# Supplementary material for: Magnetically recoverable and reusable CuFe2O4nanoparticle-catalyzed synthesis of benzoxazoles, benzothiazoles and benzimidazoles using dioxygen as oxidant
Source: Royal Society of Chemistry journal article supplement (doi:10.1039/c4ra00559g), 2014-01-01

## Supporting Information

### **Magnetically recoverable and reusable CuFe<sub>2</sub>O<sub>4</sub> nanoparticles-catalyzed synthesis of benzoxazoles, benzothiazoles and benzimidazoles using dioxygen as oxidant**

Daoshan Yang,<sup>[a]</sup> Xiao Zhu,<sup>[a]</sup> Wei Wei,<sup>[a]</sup> Nana Sun,<sup>[a]</sup> Li Yuan,<sup>[a]</sup> Min, Jiang,<sup>[b]</sup> Jinmao You<sup>[a,c]</sup>, and Hua Wang<sup>[a]</sup> \*

<sup>a</sup> Shandong Province Key Laboratory of Life-Organic Analysis, School of Chemistry and Chemical Engineering, Qufu Normal University, Qufu 273165, P. R. China

\* Fax: +86-5374458306; E-mail: huawang\_qfnu@126.com

<sup>b</sup> Beijing Key Laboratory for Analytical Methods and Instrumentation, Department of Chemistry, Tsinghua University, Beijing 100084, P. R. China

<sup>c</sup> Key Laboratory of Adaptation and Evolution of Plateau Biota, Northwest Institute of Plateau Biology, Chinese Academy of Science, Xining 810008, P. R. China

### **Table of Contents**

|                                                                                                   |    |
|---------------------------------------------------------------------------------------------------|----|
| EDX spectrum of CuFe <sub>2</sub> O <sub>4</sub>                                                  | P2 |
| The <sup>1</sup> H and <sup>13</sup> C NMR spectra of compounds <b>2a-q</b> <b>4</b> and <b>6</b> | P4 |

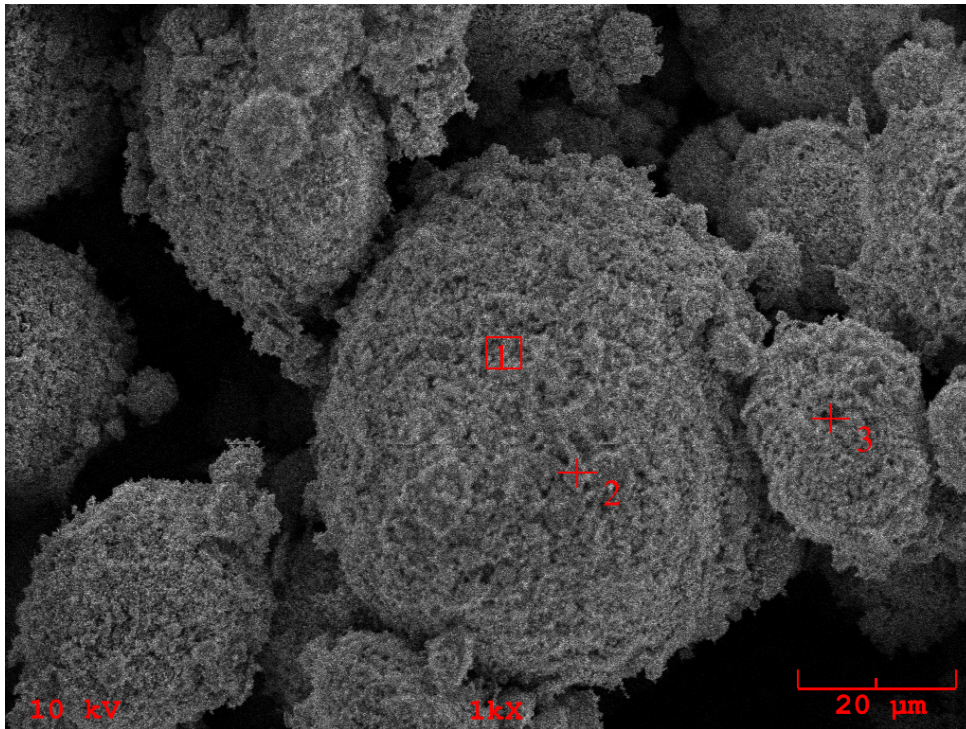

**Analysis Report: Image1-1**

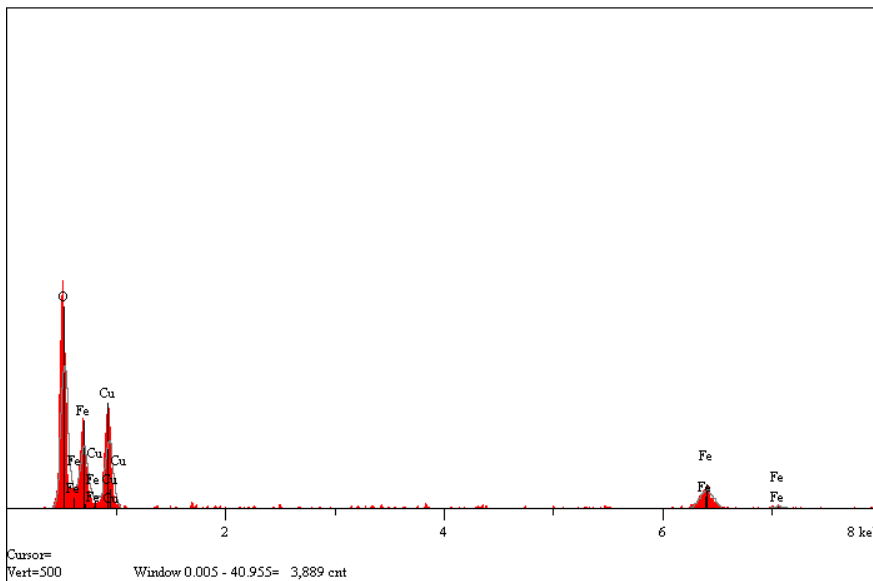

| Elt. | Line | Intensity (c/s) | Atomic % | Conc    | Units | Error 2-sig |       |
|------|------|-----------------|----------|---------|-------|-------------|-------|
| O    | Ka   | 40.08           | 43.701   | 17.473  | wt. % | 1.057       |       |
| Fe   | Ka   | 9.94            | 35.725   | 49.856  | wt. % | 5.775       |       |
| Cu   | Ka   | 0.61            | 20.574   | 32.671  | wt. % | 15.249      |       |
|      |      |                 | 100.000  | 100.000 | wt. % |             | Total |

kV 10.0

Takeoff Angle 35.0°

Elapsed Livetime 30.0

### Analysis Report: Image1-2

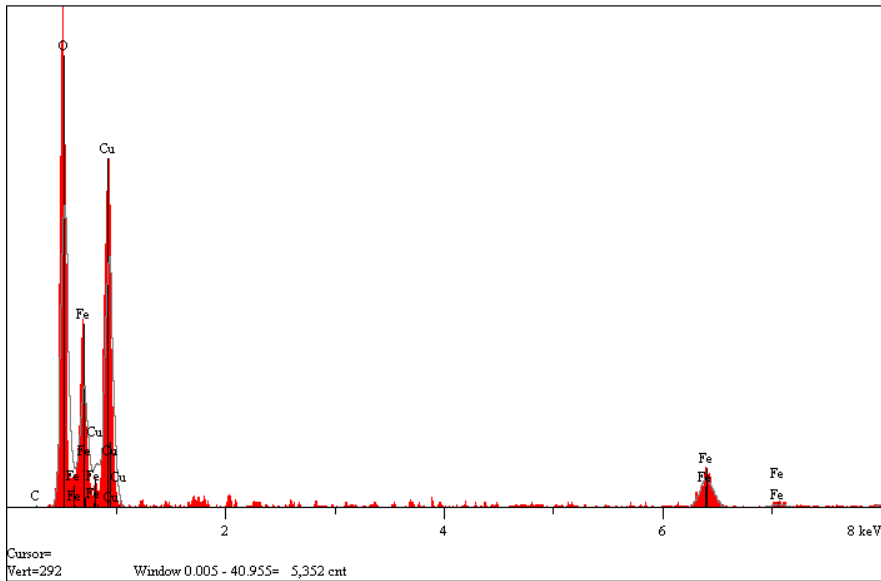

| Elt. | Line | Intensity (c/s) | Atomic % | Conc    | Units | Error 2-sig |       |
|------|------|-----------------|----------|---------|-------|-------------|-------|
| C    | Ka   | 0.00            | 0.000    | 0.000   | wt. % | 0.000       |       |
| O    | Ka   | 49.35           | 43.990   | 17.288  | wt. % | 0.974       |       |
| Fe   | Ka   | 8.88            | 24.916   | 34.177  | wt. % | 4.462       |       |
| Cu   | Ka   | 1.17            | 31.094   | 48.535  | wt. % | 16.412      |       |
|      |      |                 | 100.000  | 100.000 | wt. % |             | Total |
|      |      |                 |          |         |       |             | 1     |

kV 10.0

Takeoff Angle 35.0°

Elapsed Livetime 30.0

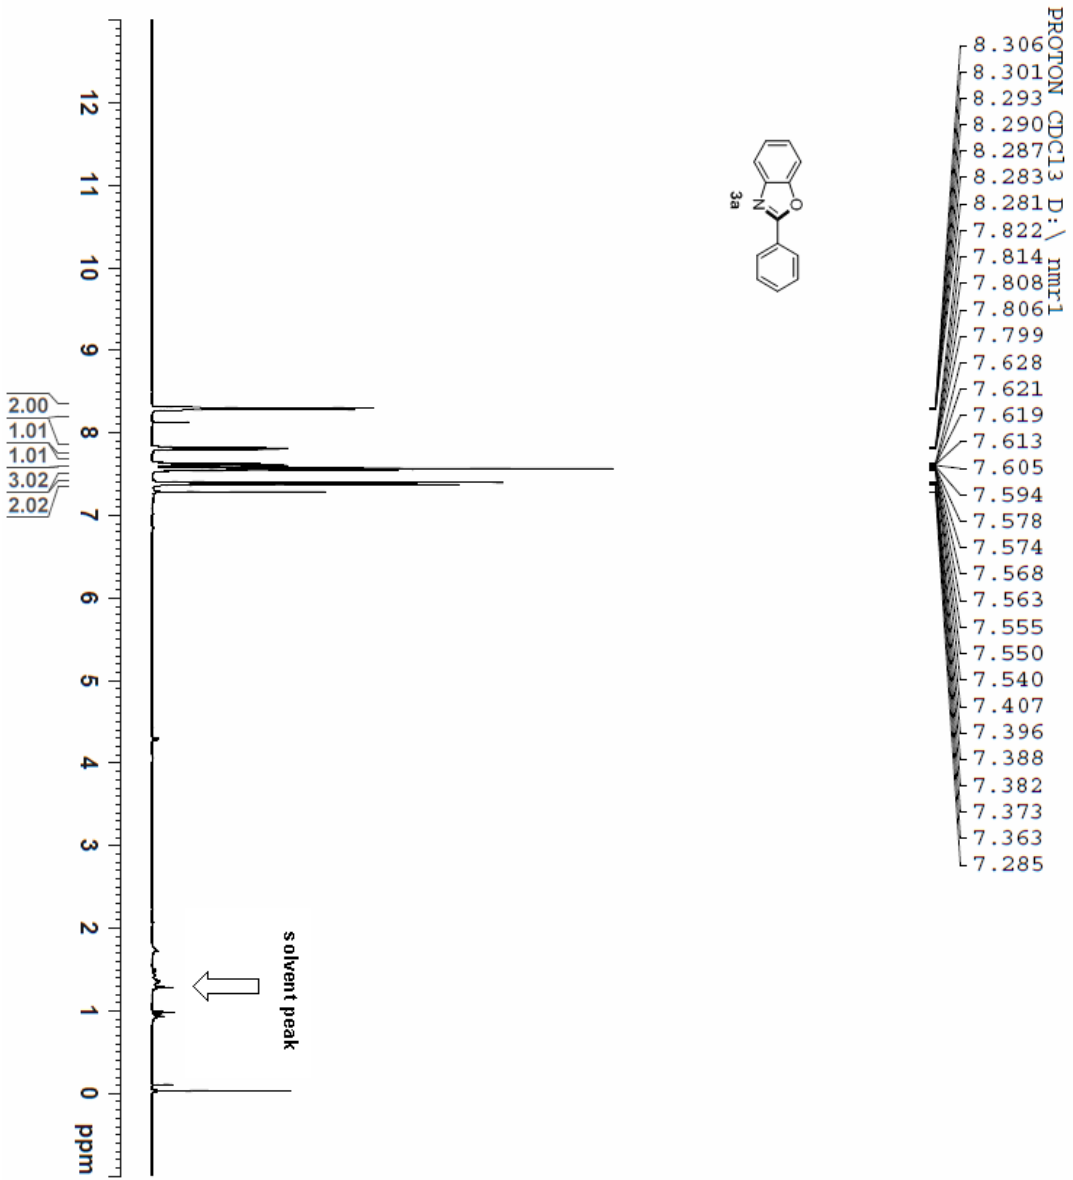

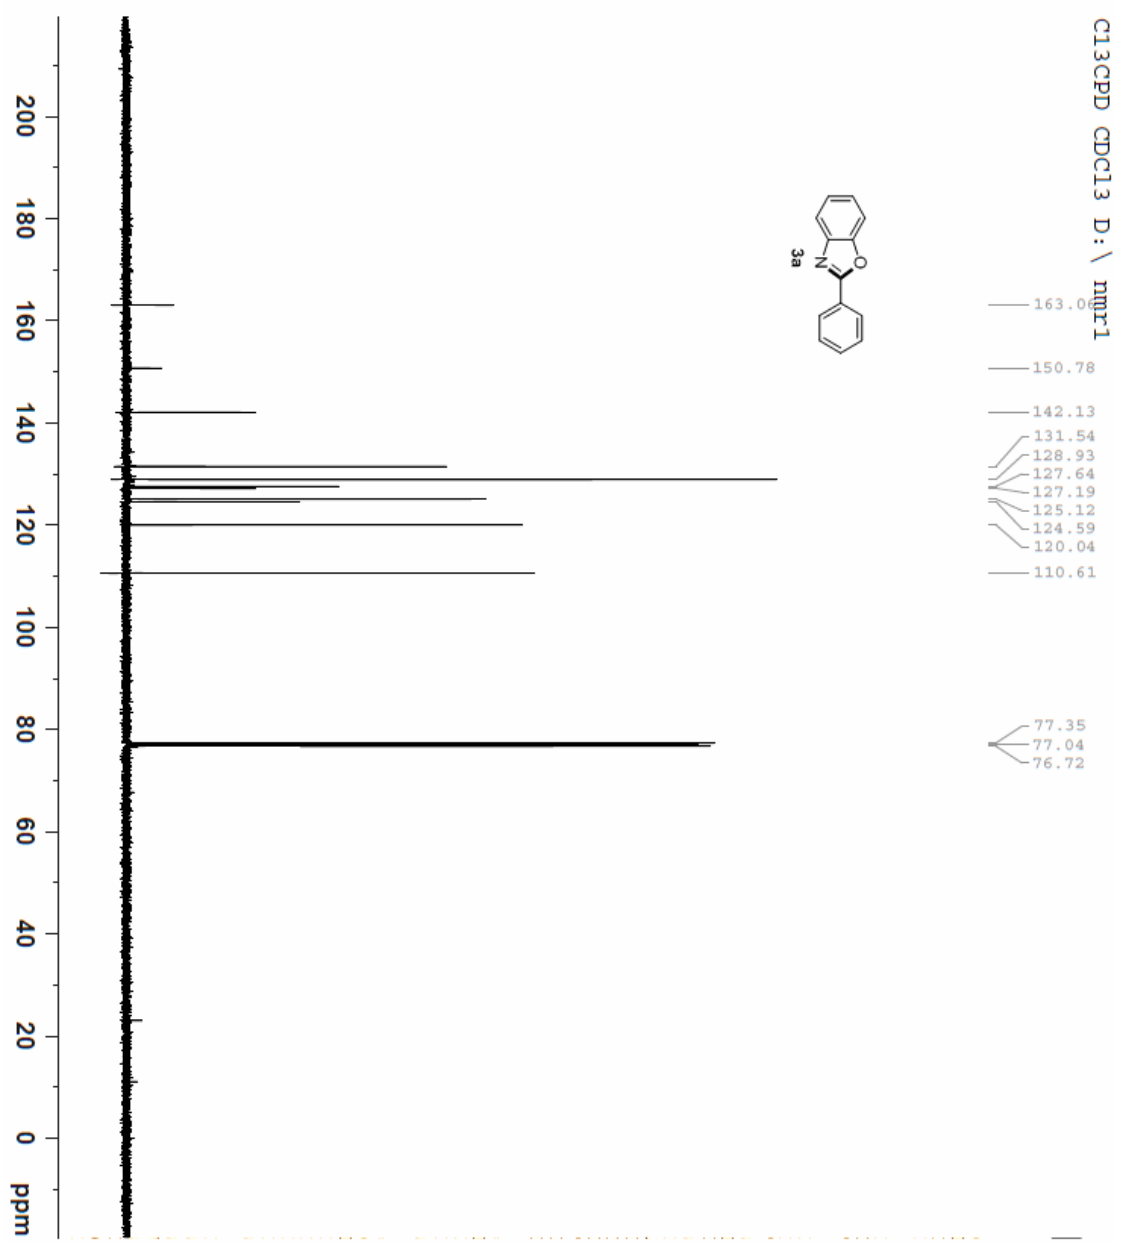

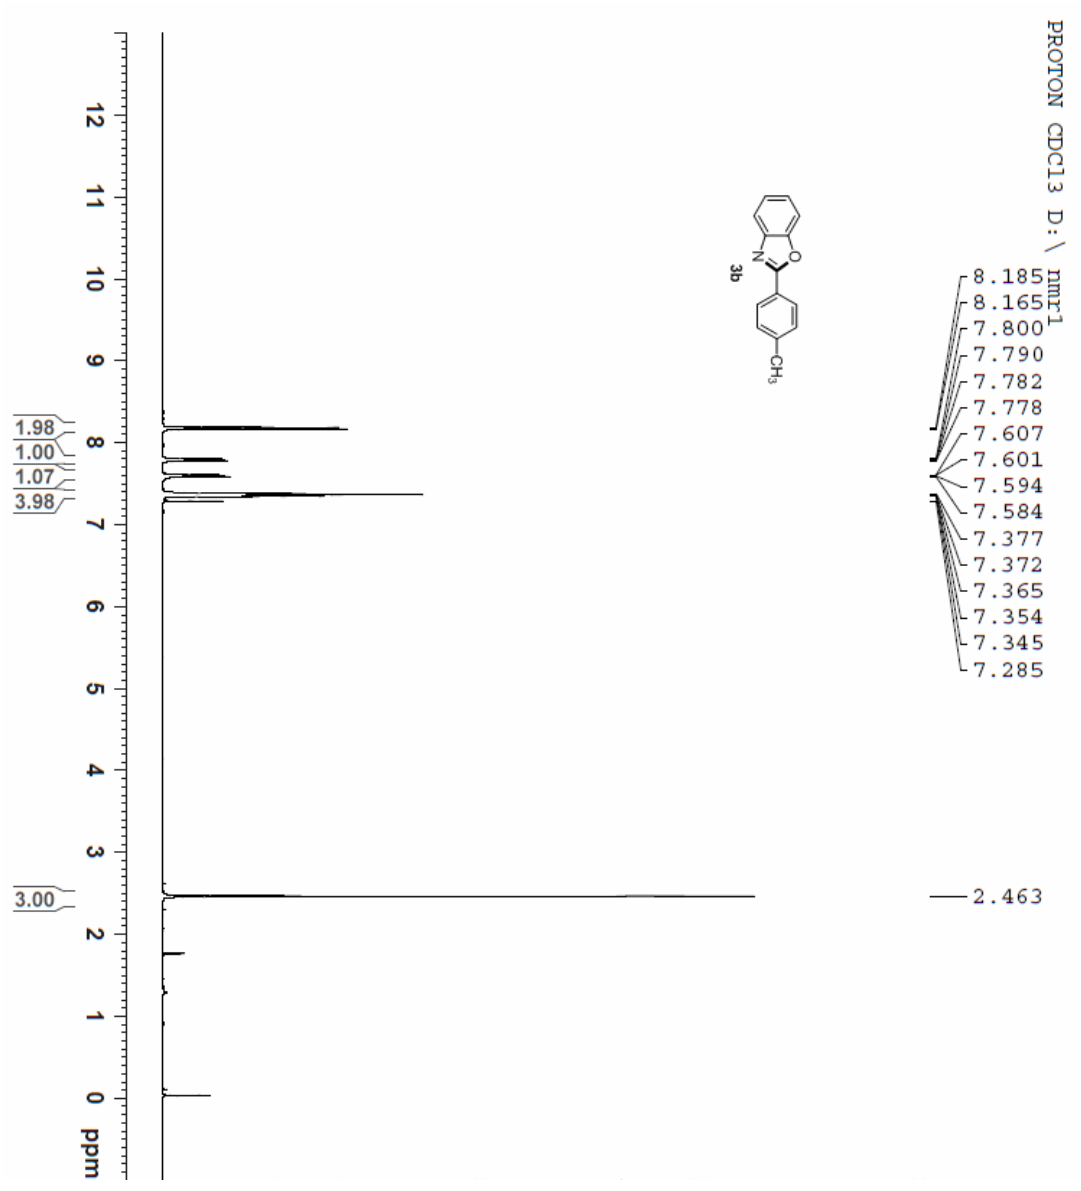

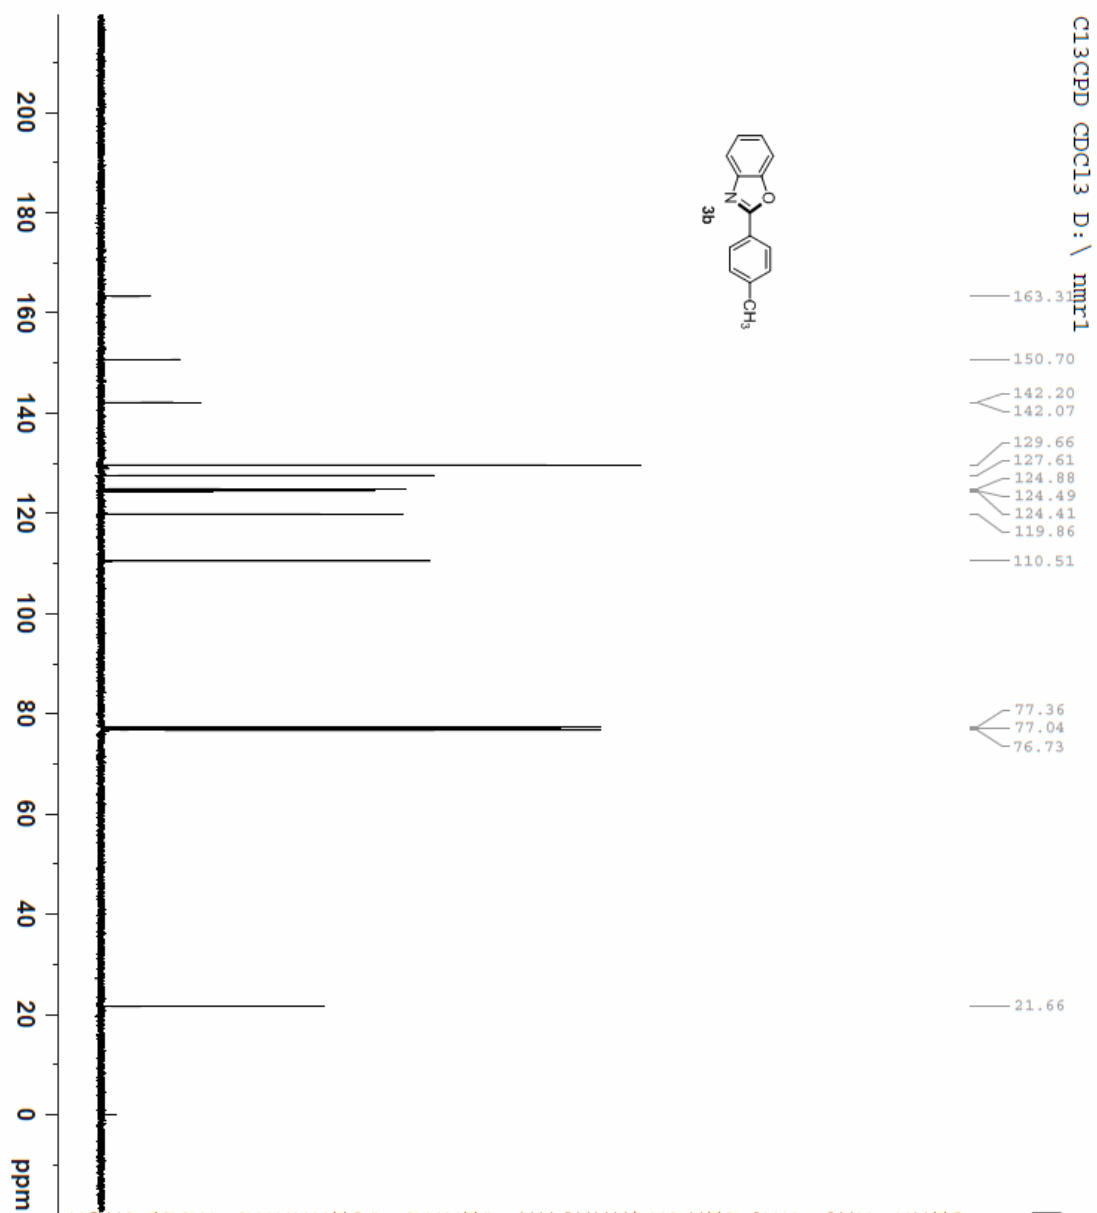

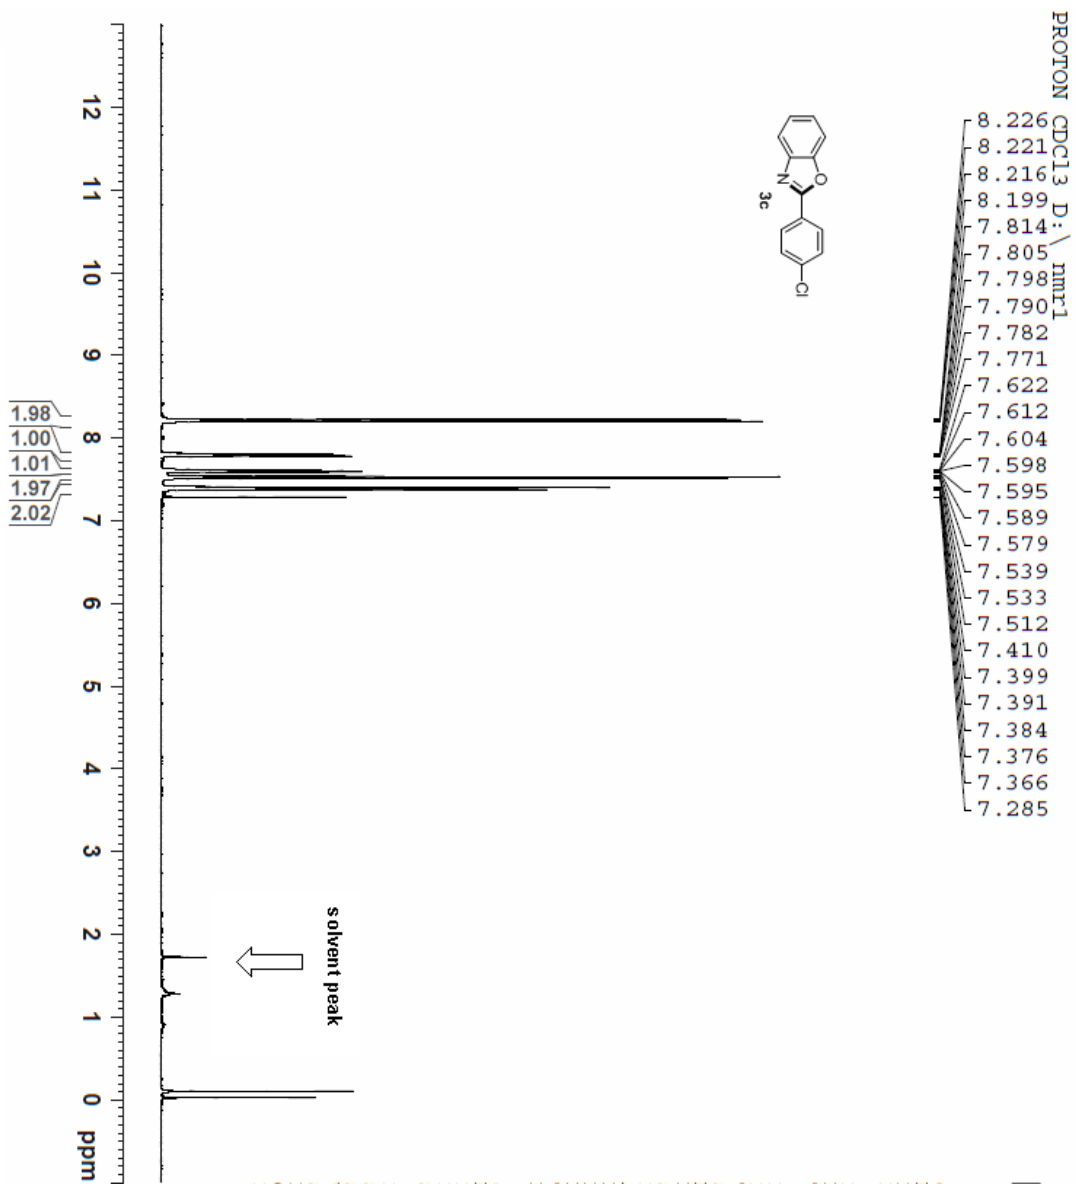



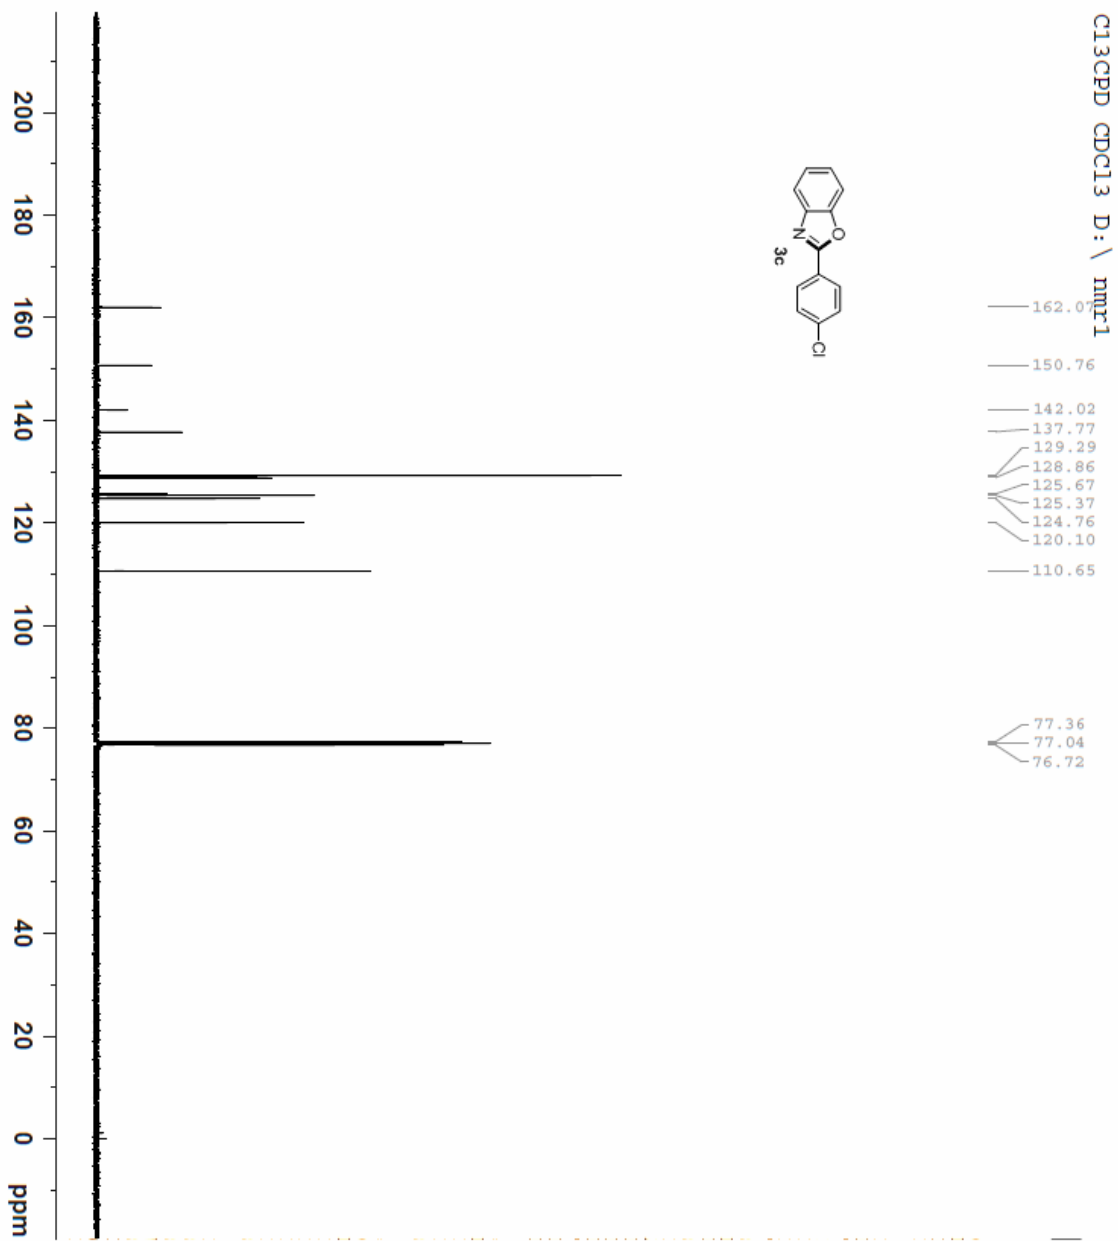

PROTON CDCl3 D: \nmr1

8.153  
8.131  
7.808  
7.801  
7.797  
7.793  
7.785  
7.700  
7.678  
7.615  
7.606  
7.597  
7.592  
7.583  
7.415  
7.412  
7.404  
7.397  
7.394  
7.390  
7.380  
7.369  
7.285

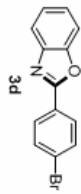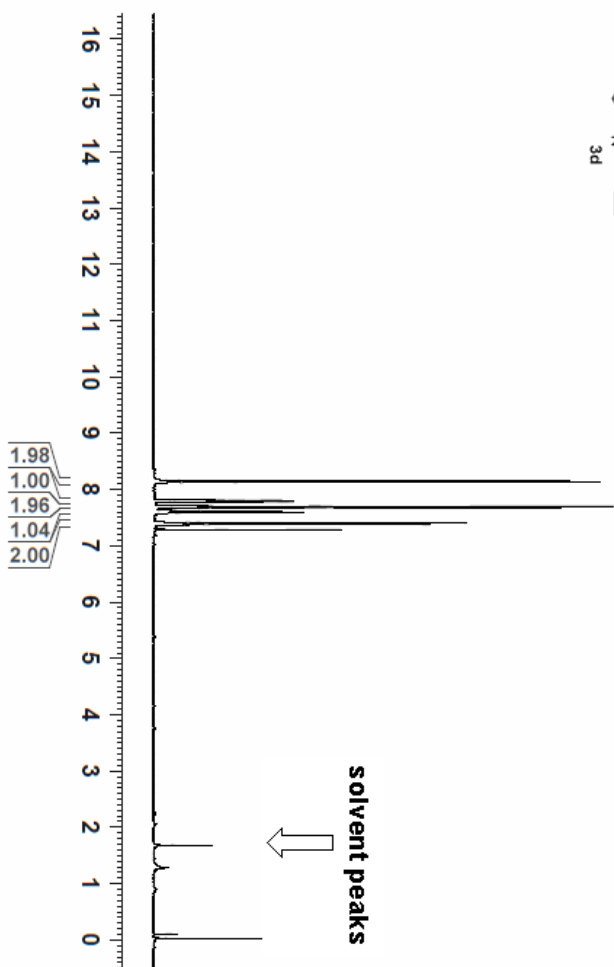

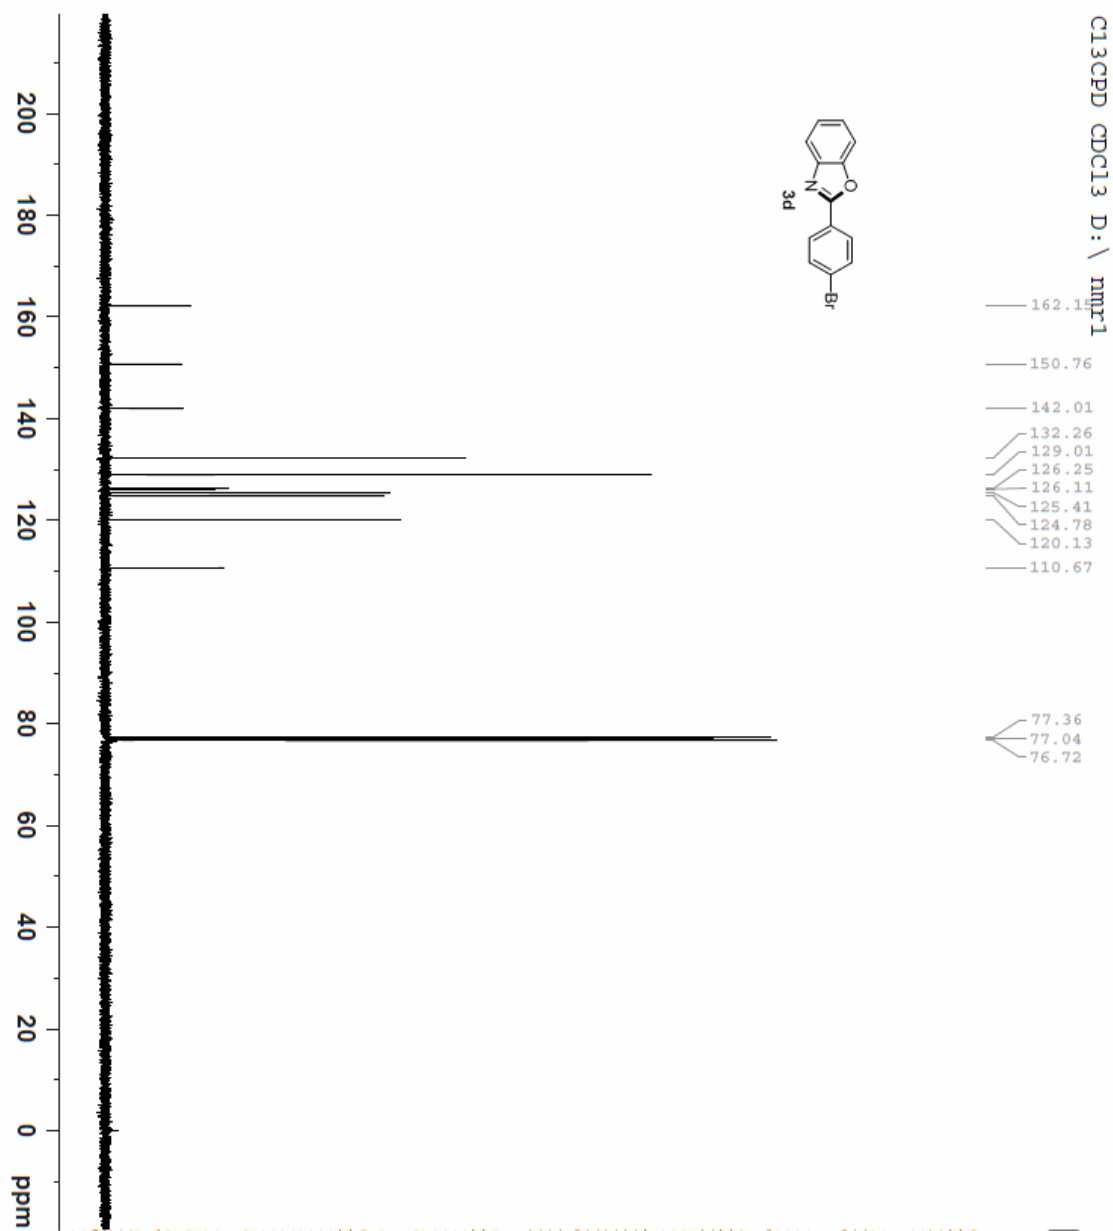

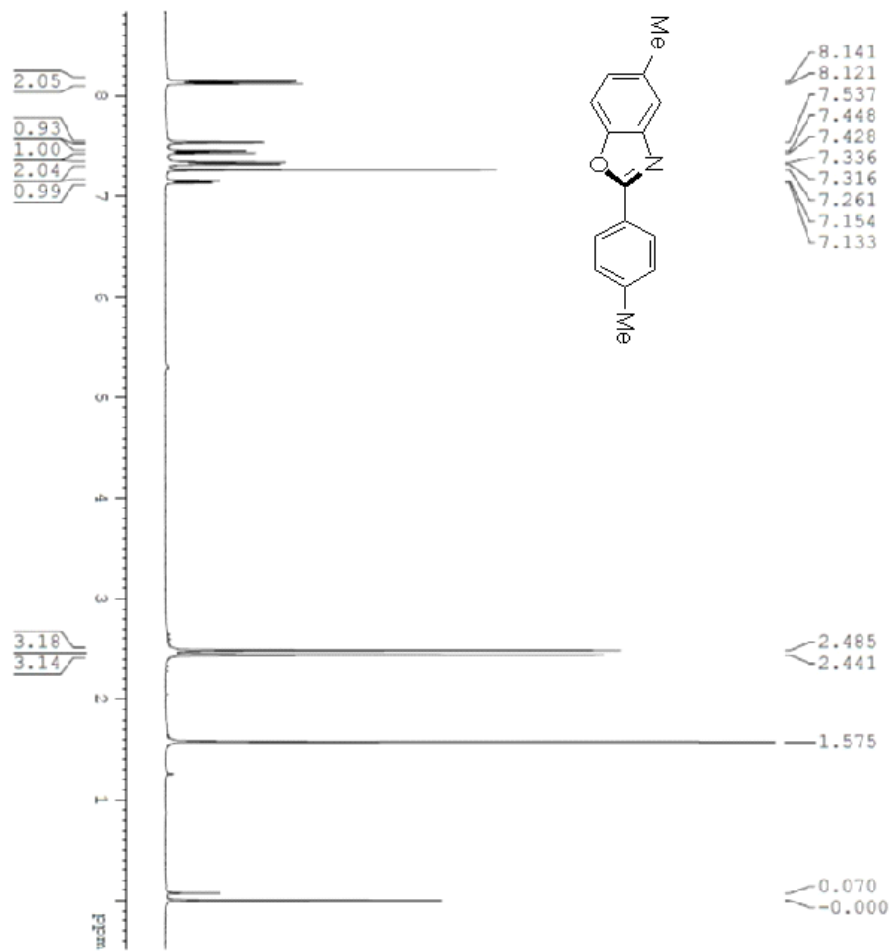

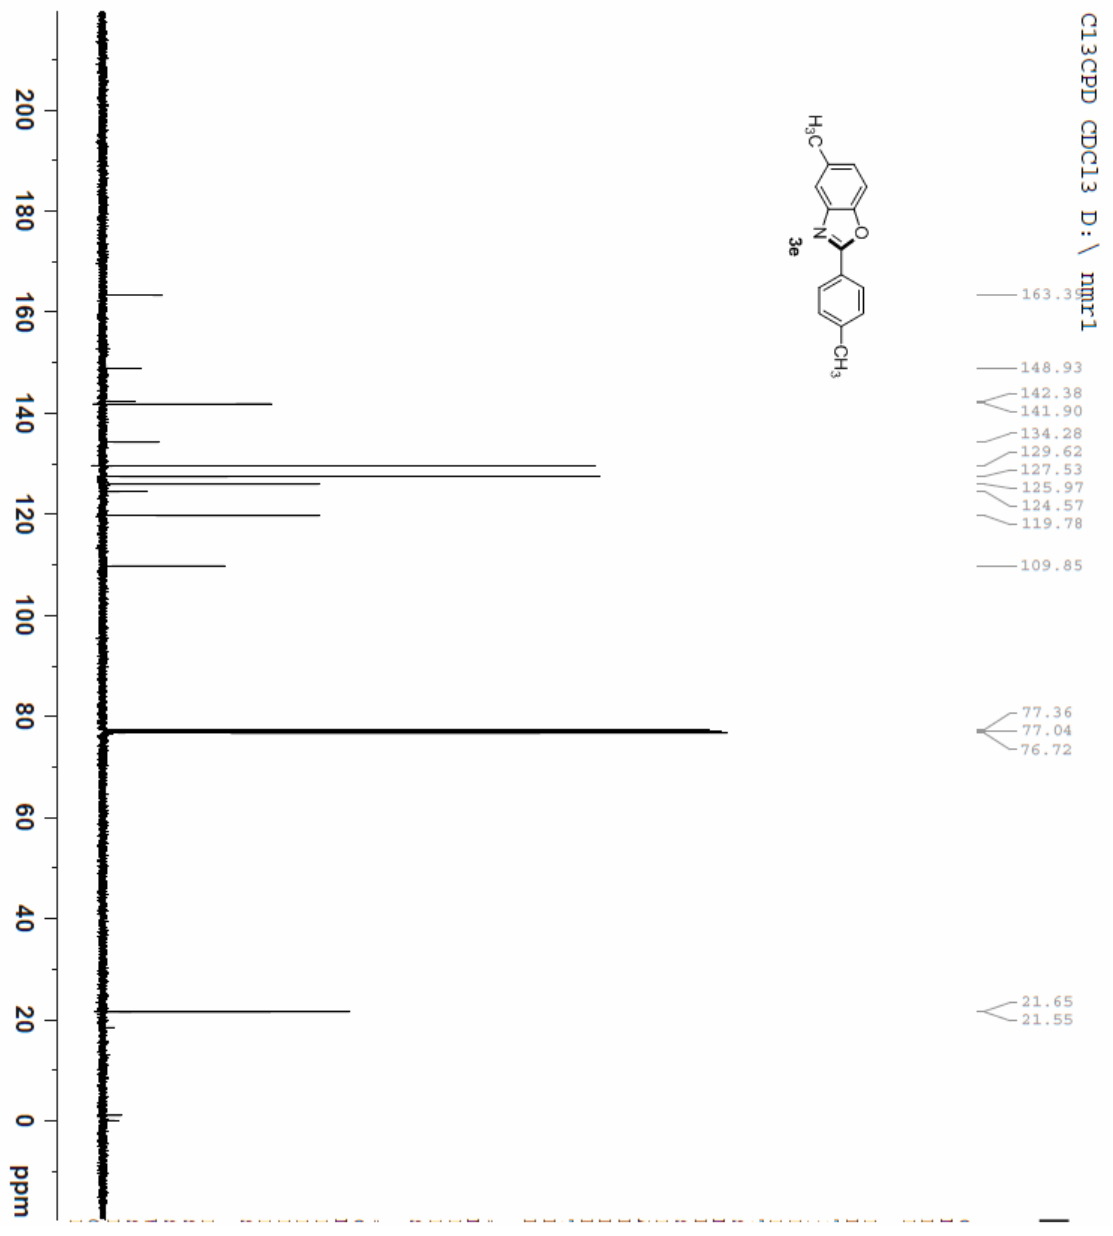

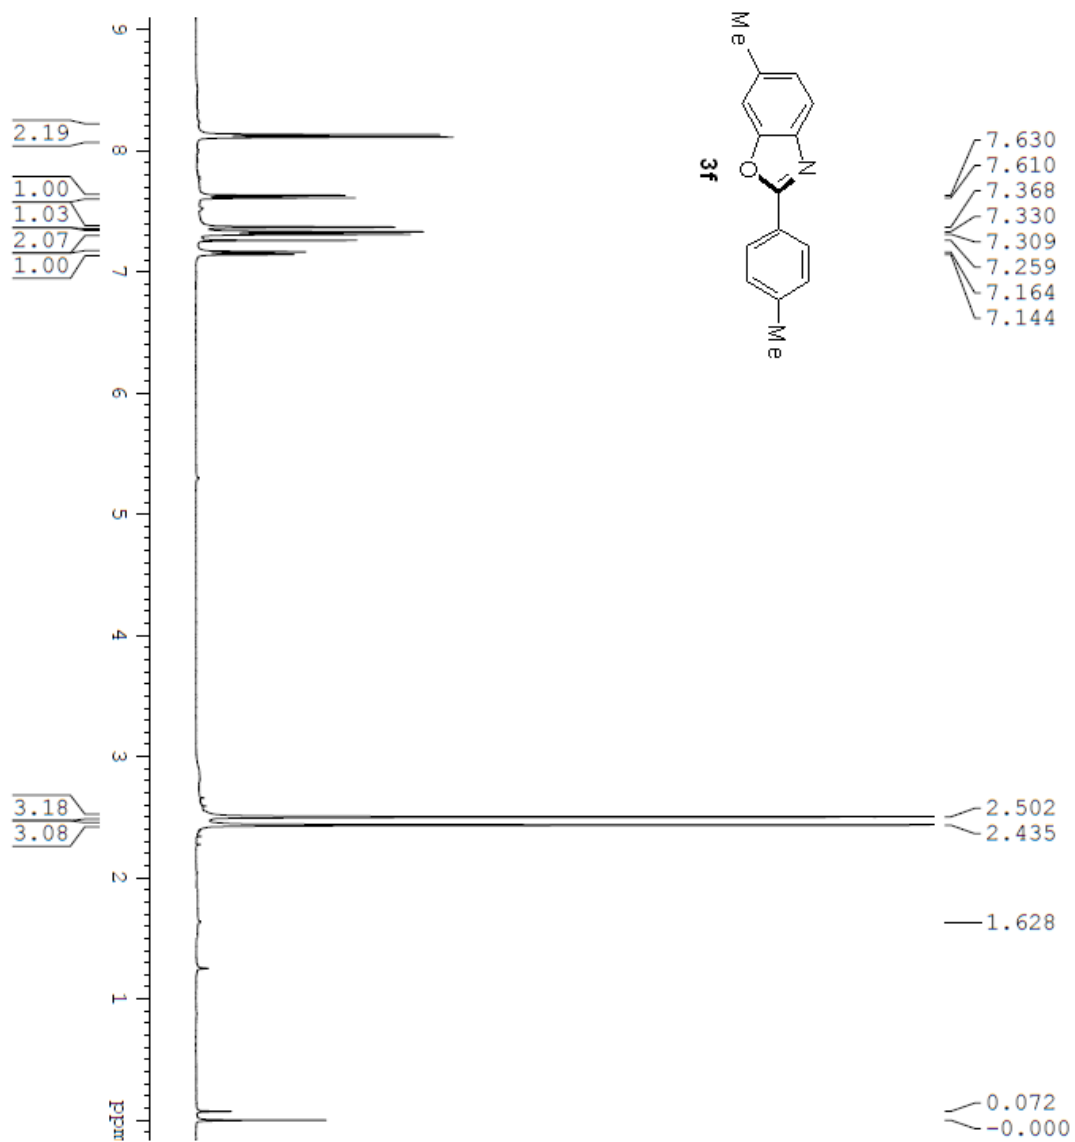

C13CPD CDCl3 D: \ mpr1

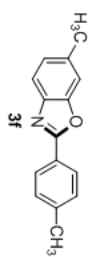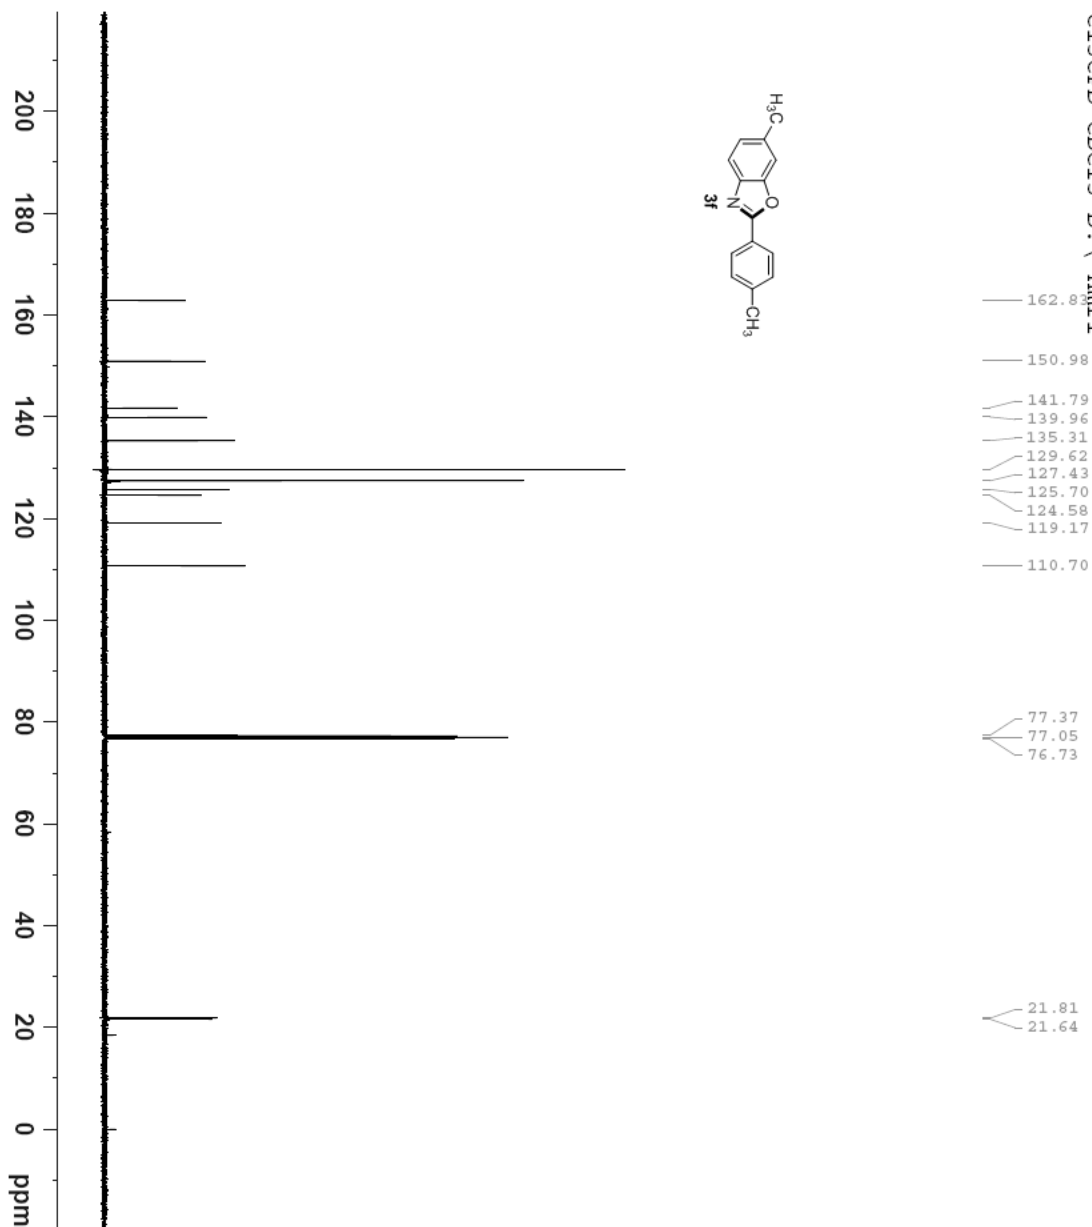

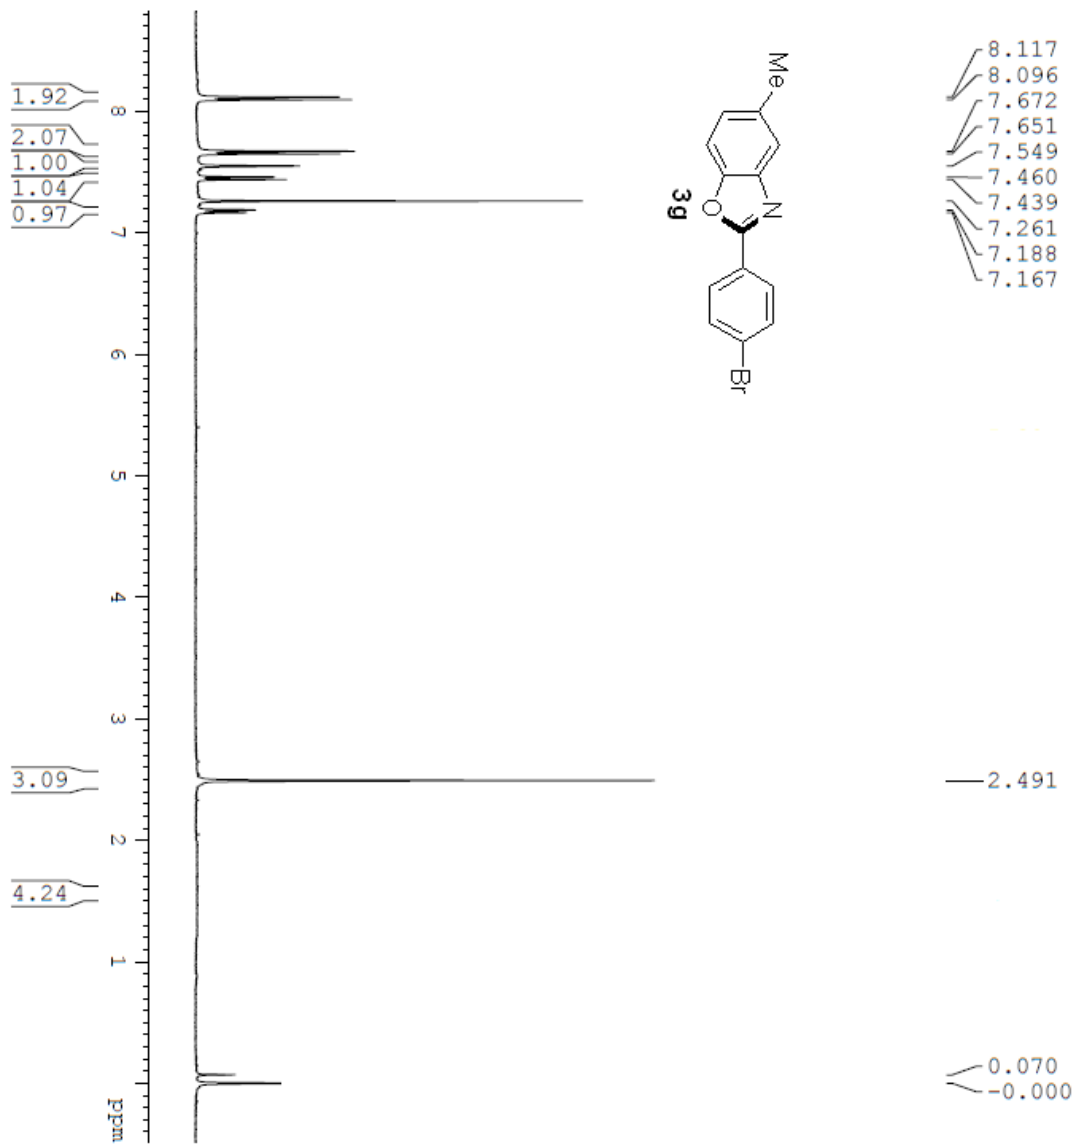



C13CPD CDCl3 D: \ mmr1

162.20  
149.00  
142.20  
134.63  
132.19  
128.94  
126.54  
126.26  
126.05  
119.99  
110.00

77.35  
77.04  
76.72

21.55

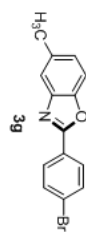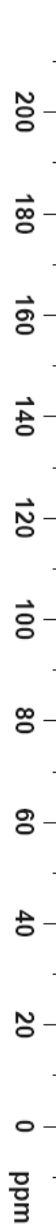

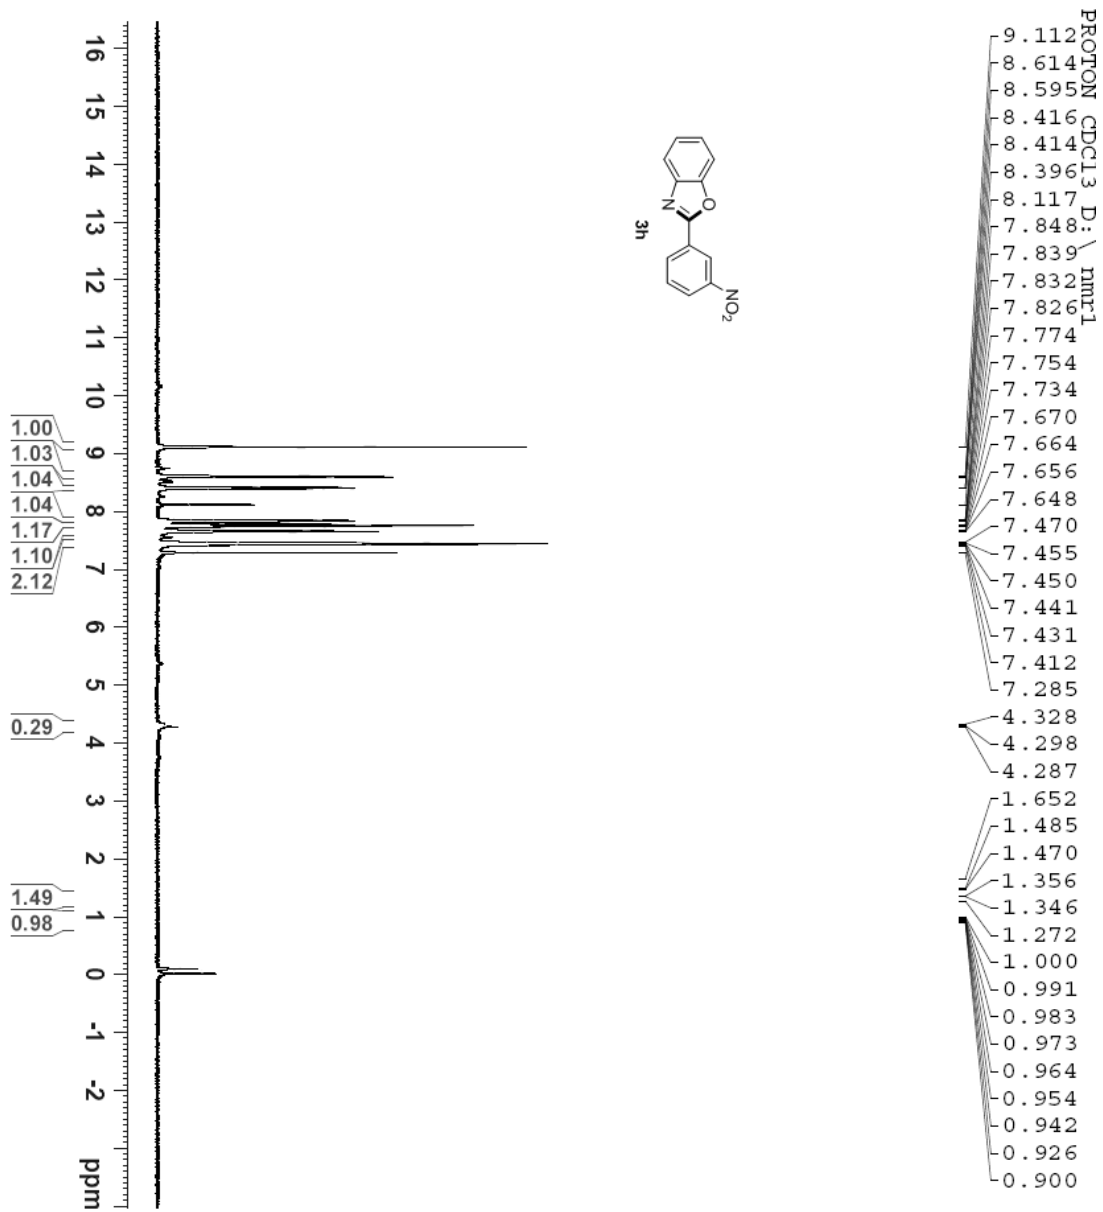

C13CPD CDCl3 D: \ nmr1

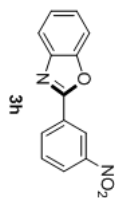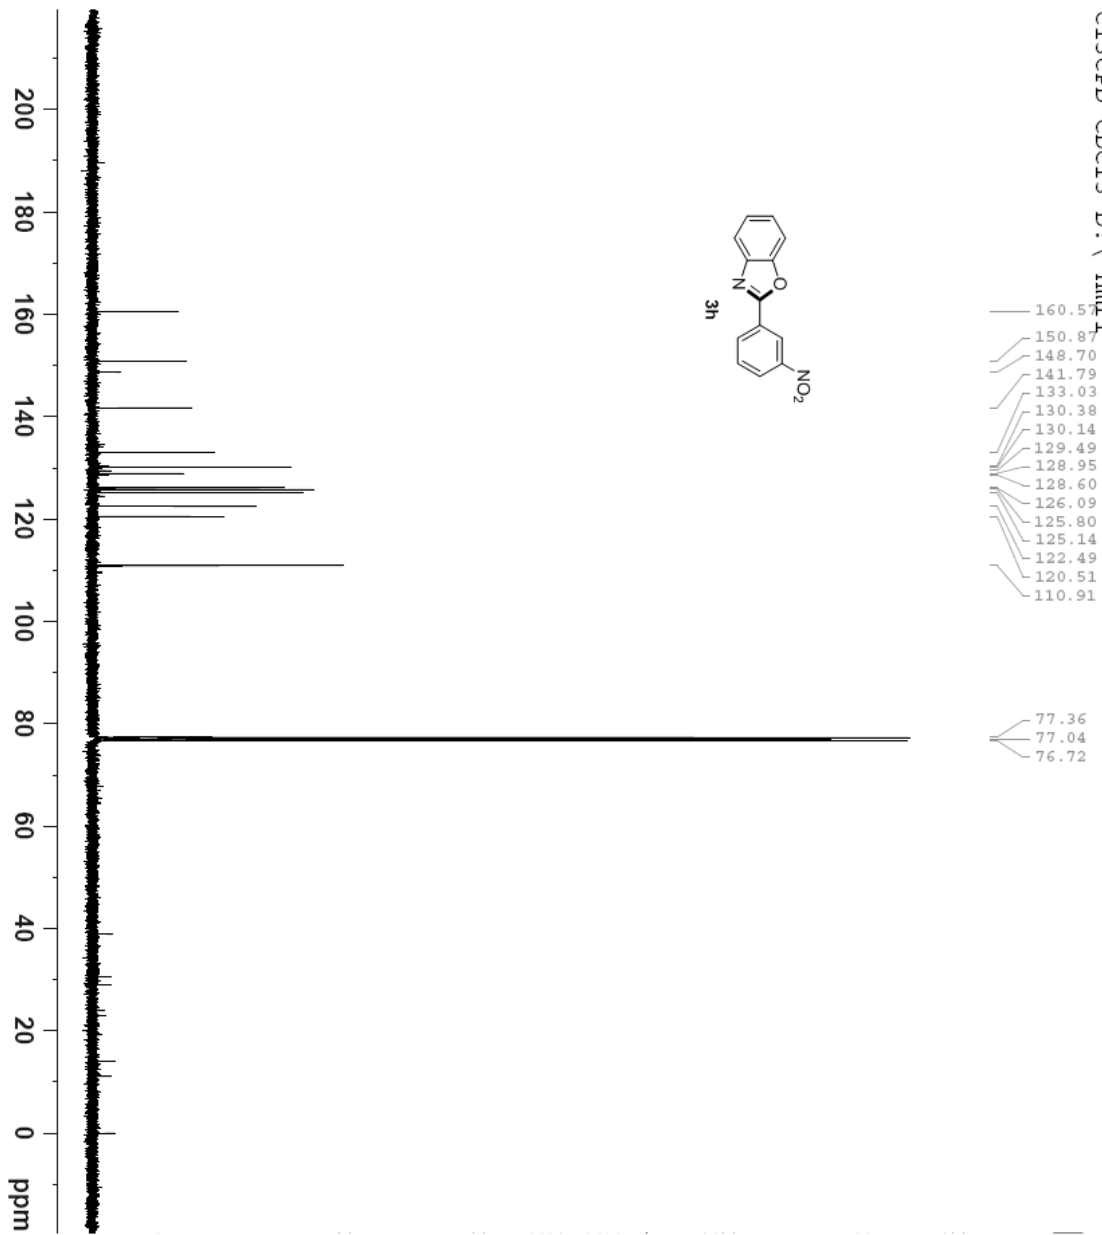

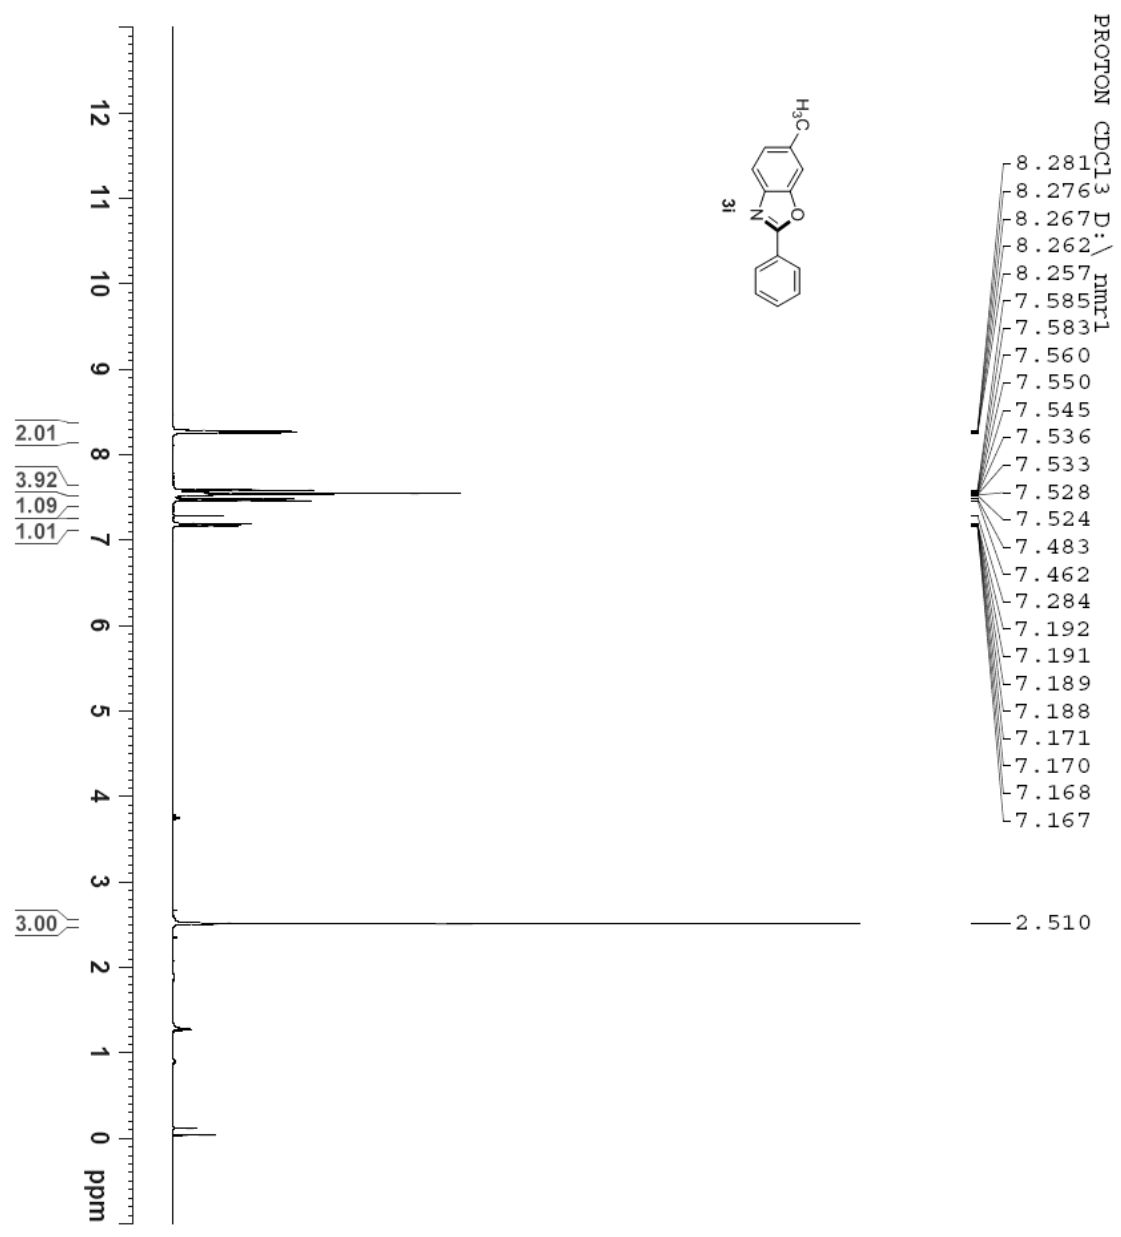

C13CPD CDCl3 D: \ nmr1

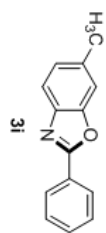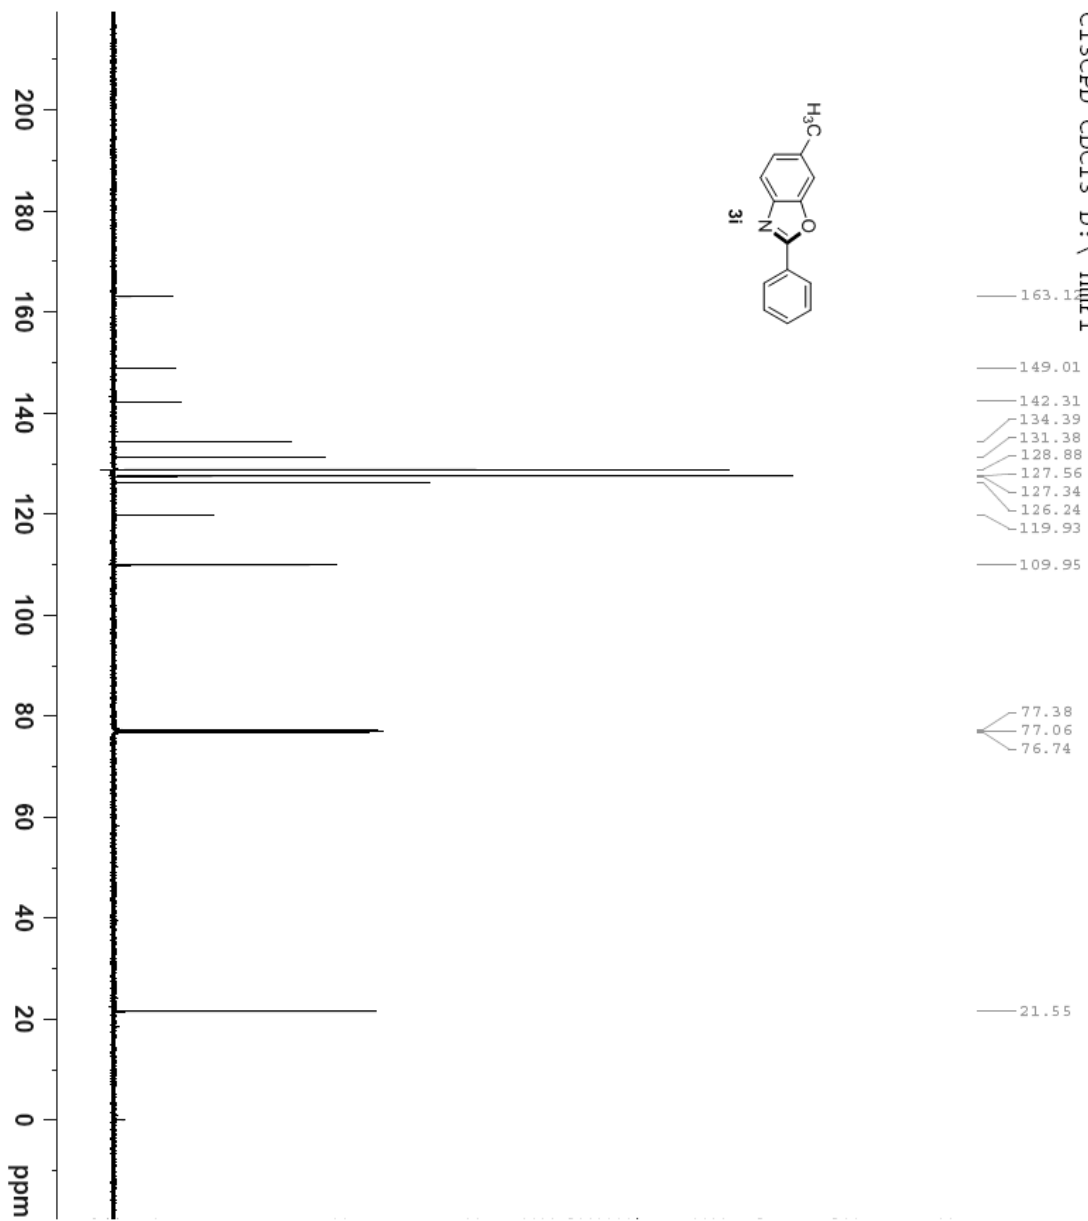

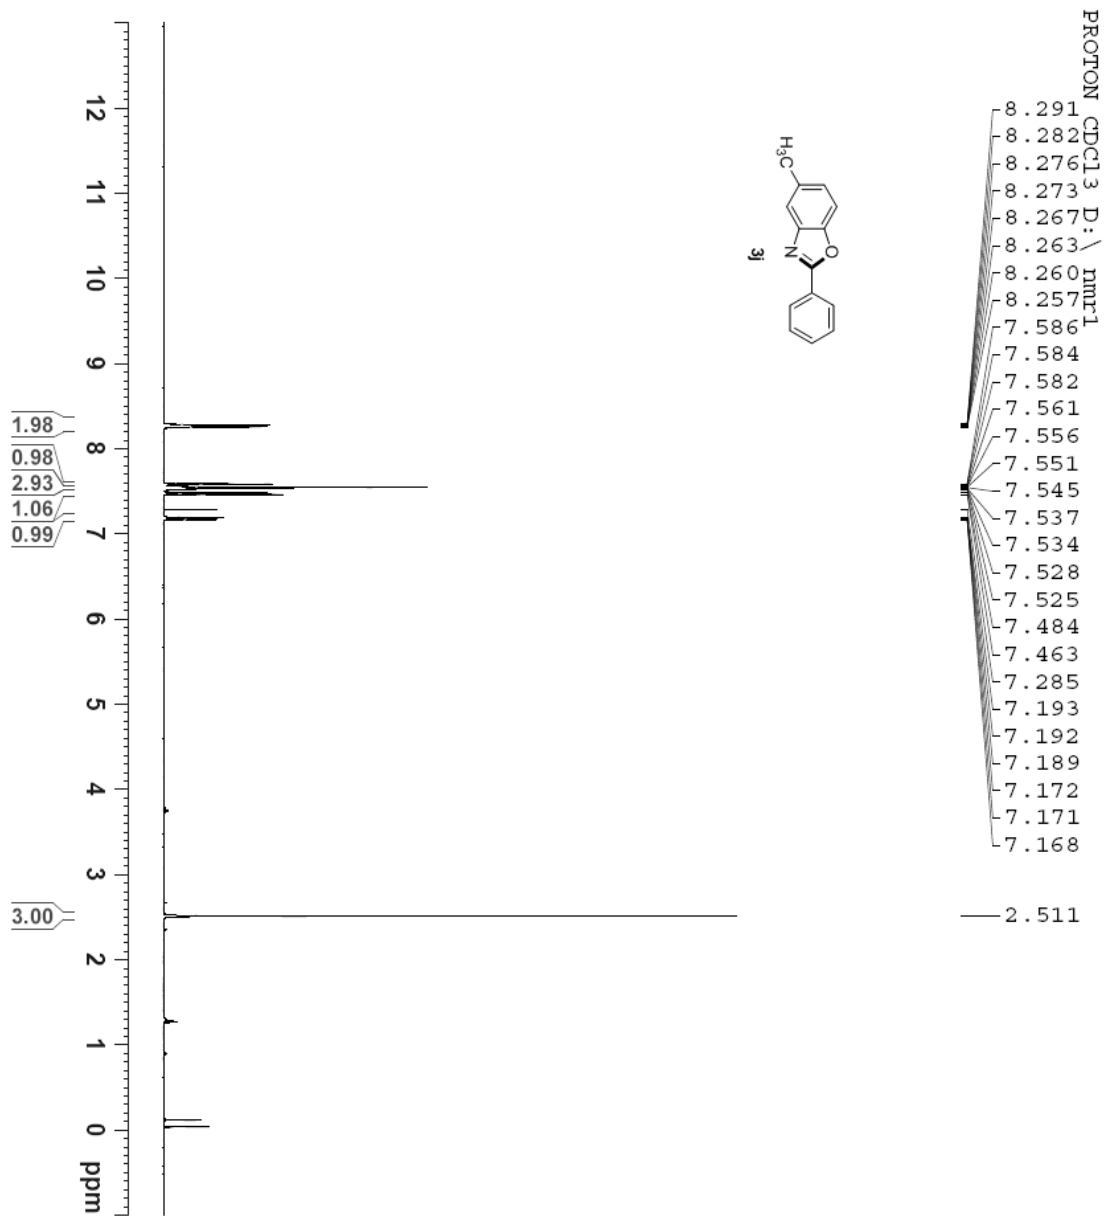

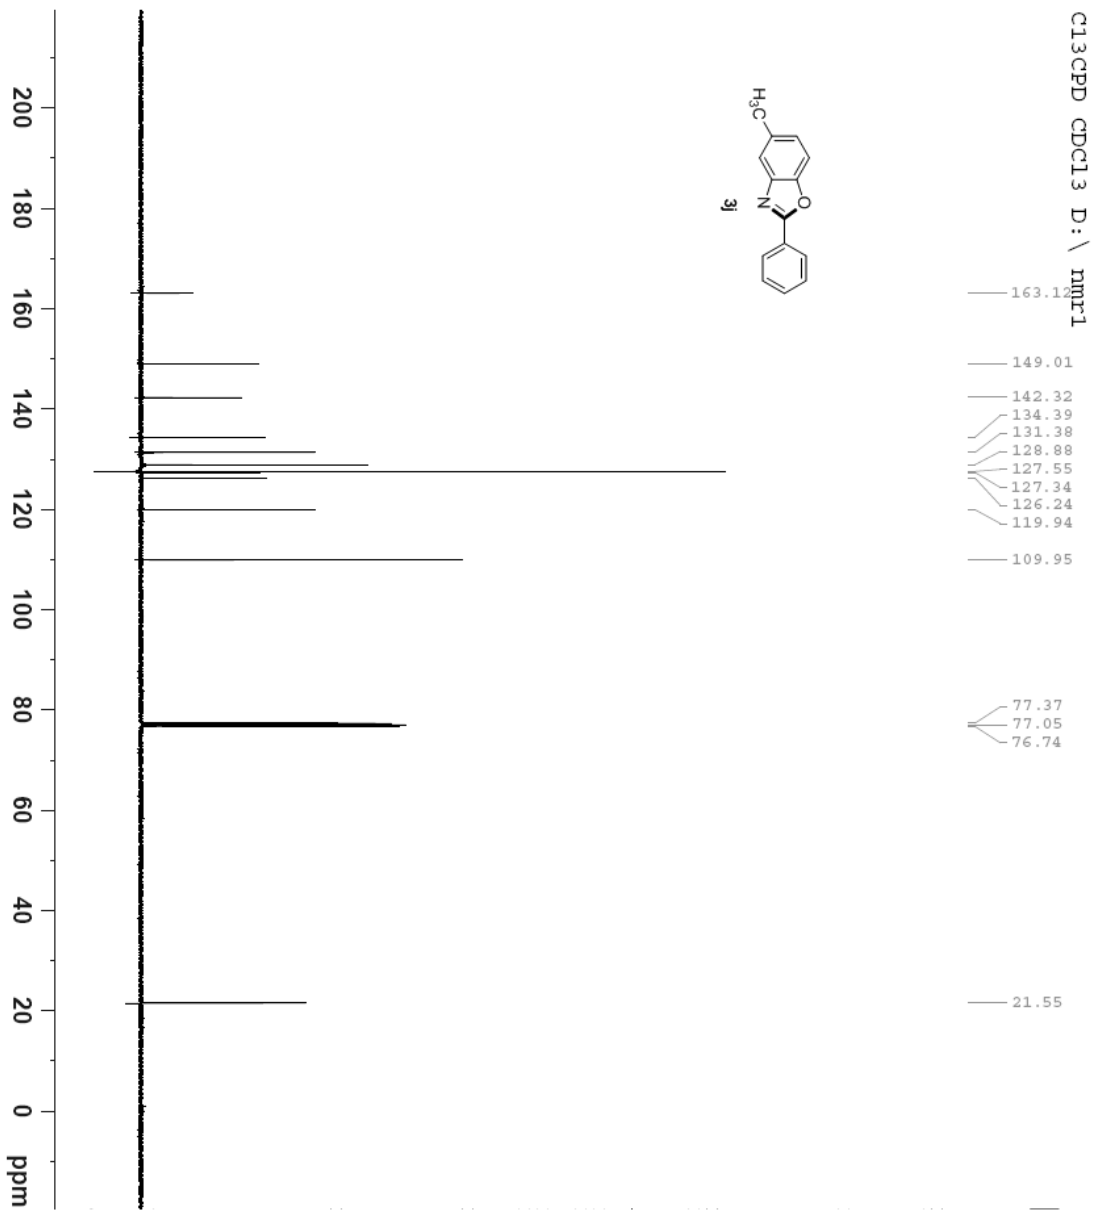

PROTON CDCl3 D: \

nmr1

- 8.272
- 8.267
- 8.258
- 8.255
- 8.250
- 8.242
- 8.237
- 7.560
- 7.559
- 7.468
- 7.447
- 7.285
- 7.243
- 7.221
- 7.204
- 7.199
- 7.189
- 7.187
- 7.167
- 2.506

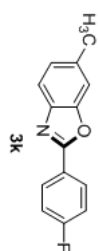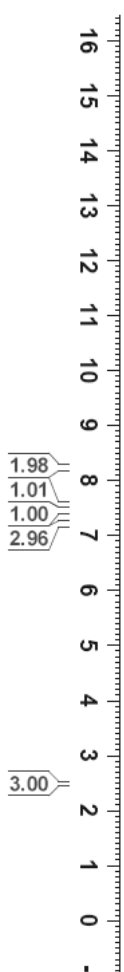



C13CPD CDCl3 D: \ pmr1

- 165.98
- 163.47
- 162.24
- 149.01
- 142.25
- 134.50
- 129.79
- 129.70
- 126.26
- 123.68
- 123.64
- 119.89
- 116.25
- 116.03
- 109.92

- 77.36
- 77.04
- 76.72

- 21.53

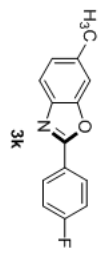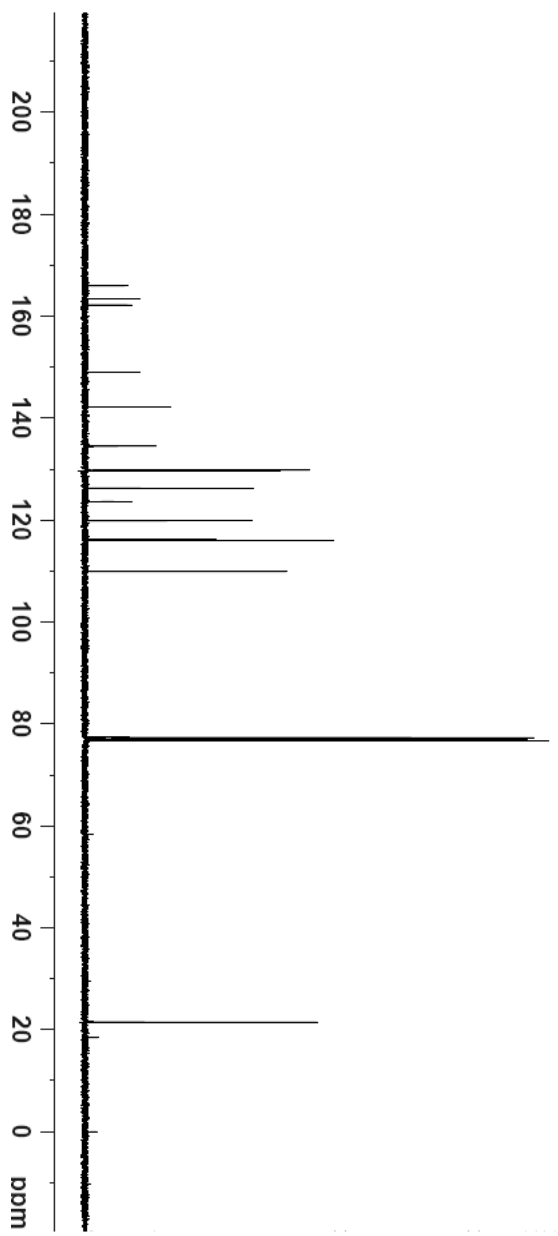

PROTON CDCl3 D: \ mmr1

- 8.182
- 8.161
- 7.555
- 7.506
- 7.485
- 7.458
- 7.437
- 7.285
- 7.188
- 7.168

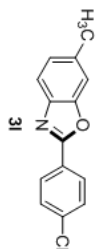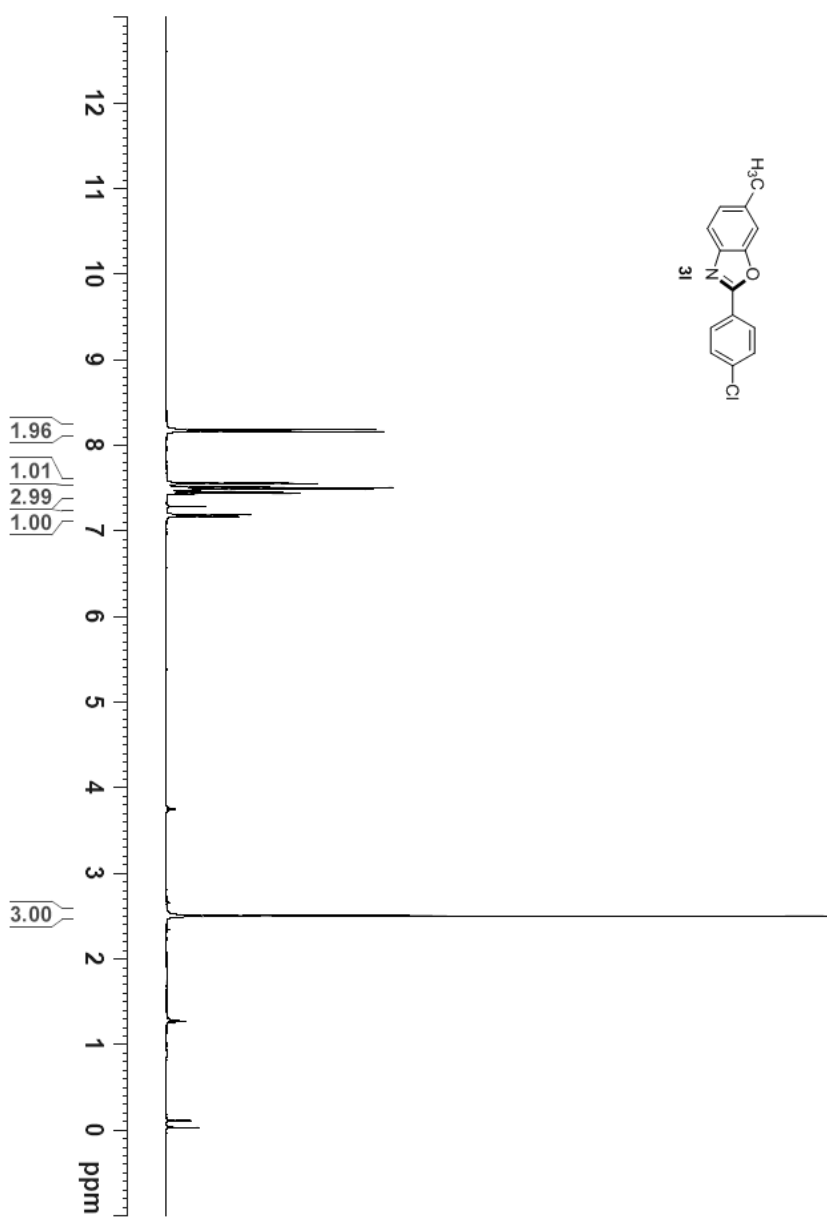

— 2.501

C13CPD CDCl3 D: \ nmr1

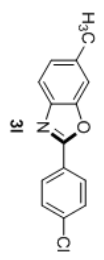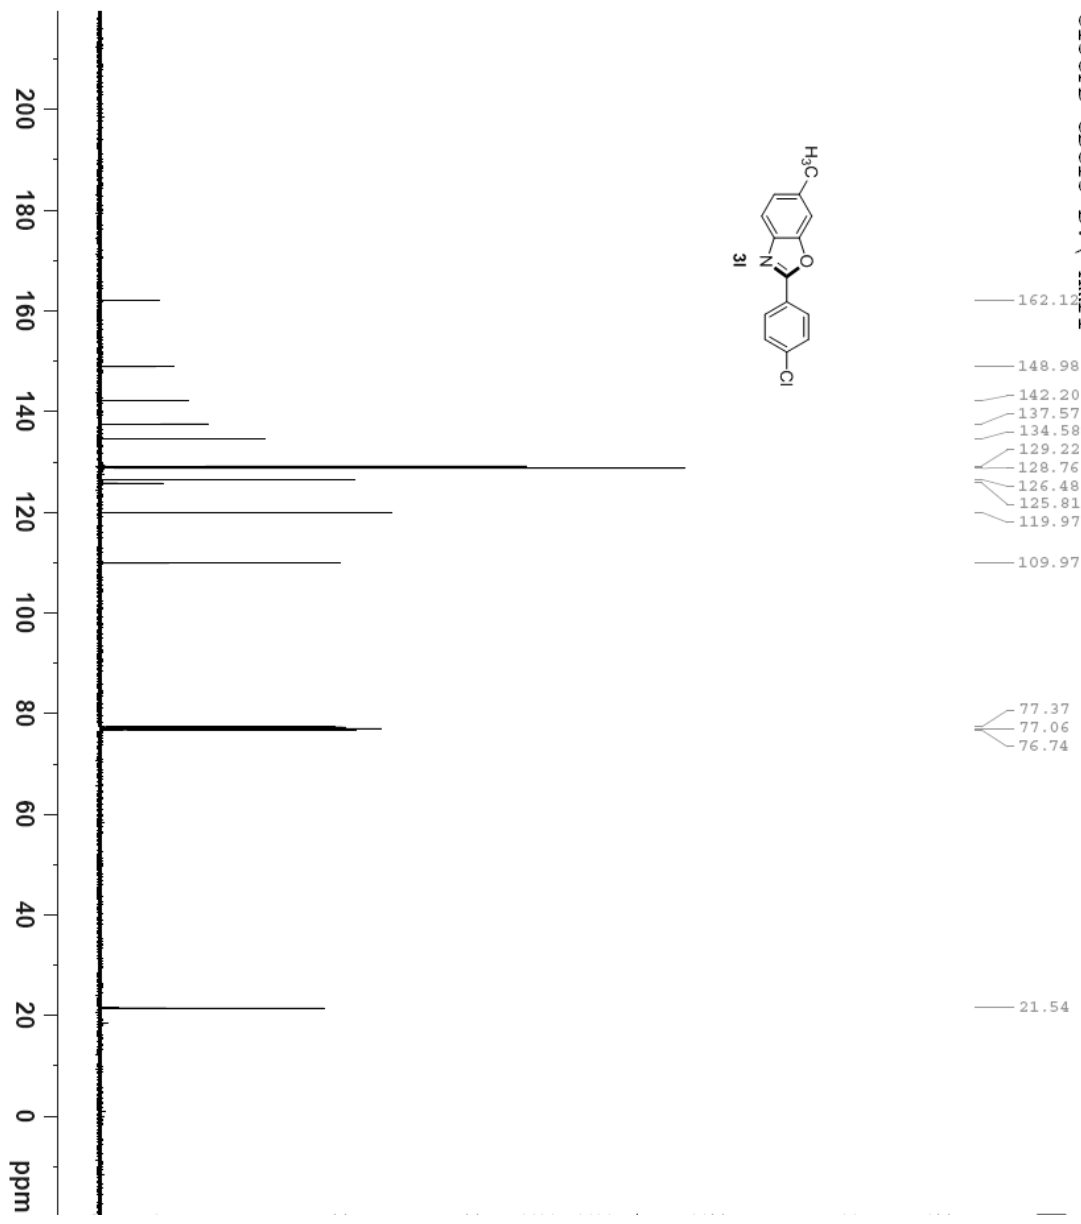

PROTON CDCl3 D: \ nmr1

8.119  
8.098  
7.680  
7.660  
7.641  
7.392  
7.284  
7.207  
7.187

2.528

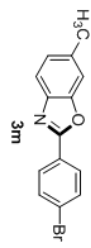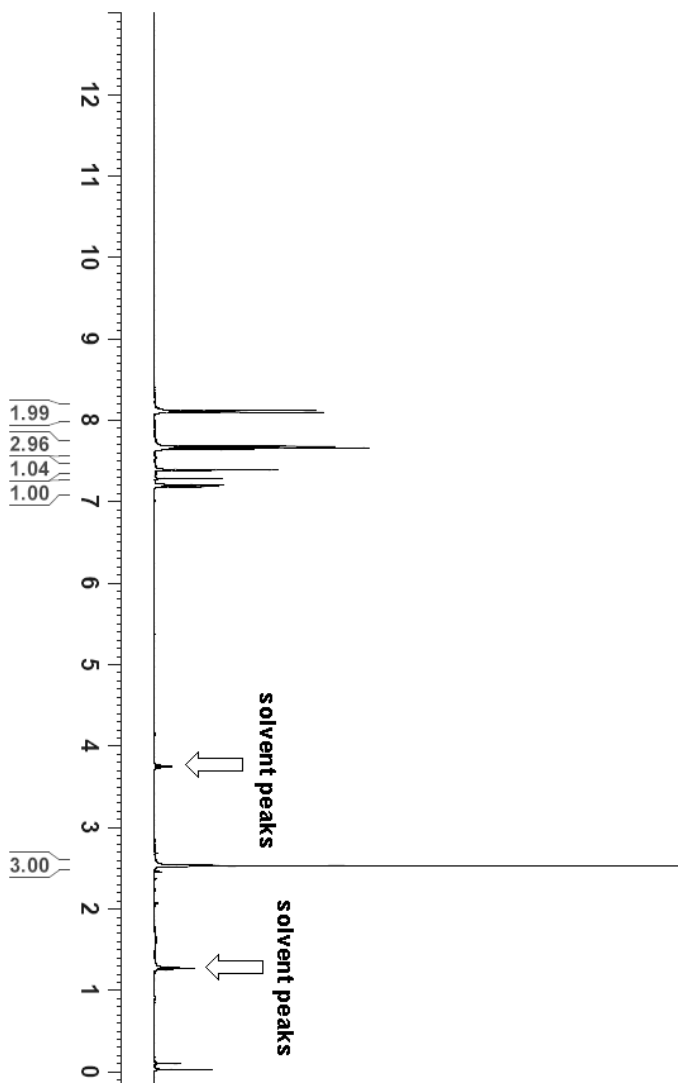

C13CPD CDCl3 D: \ nmr1

- 161.65
- 151.04
- 139.81
- 135.93
- 132.19
- 128.85
- 126.28
- 126.03
- 125.94
- 119.43
- 110.81
  
- 77.36
- 77.04
- 76.72
  
- 21.86

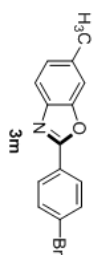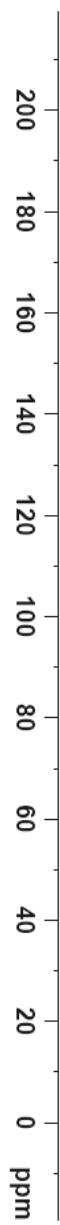

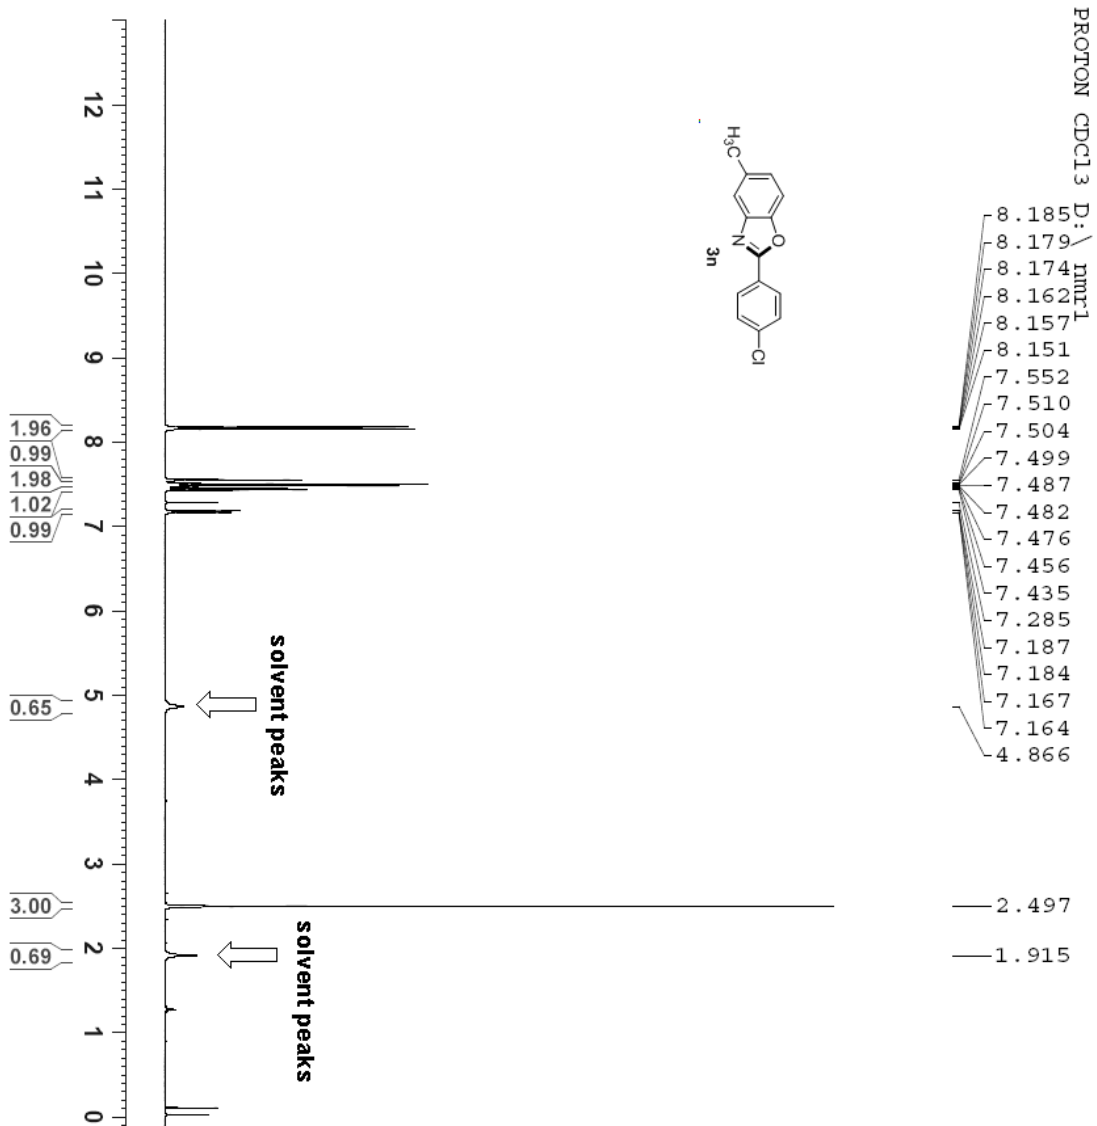

C13CPD CDCl3 D: \ nmr1

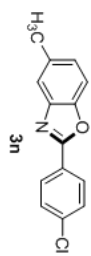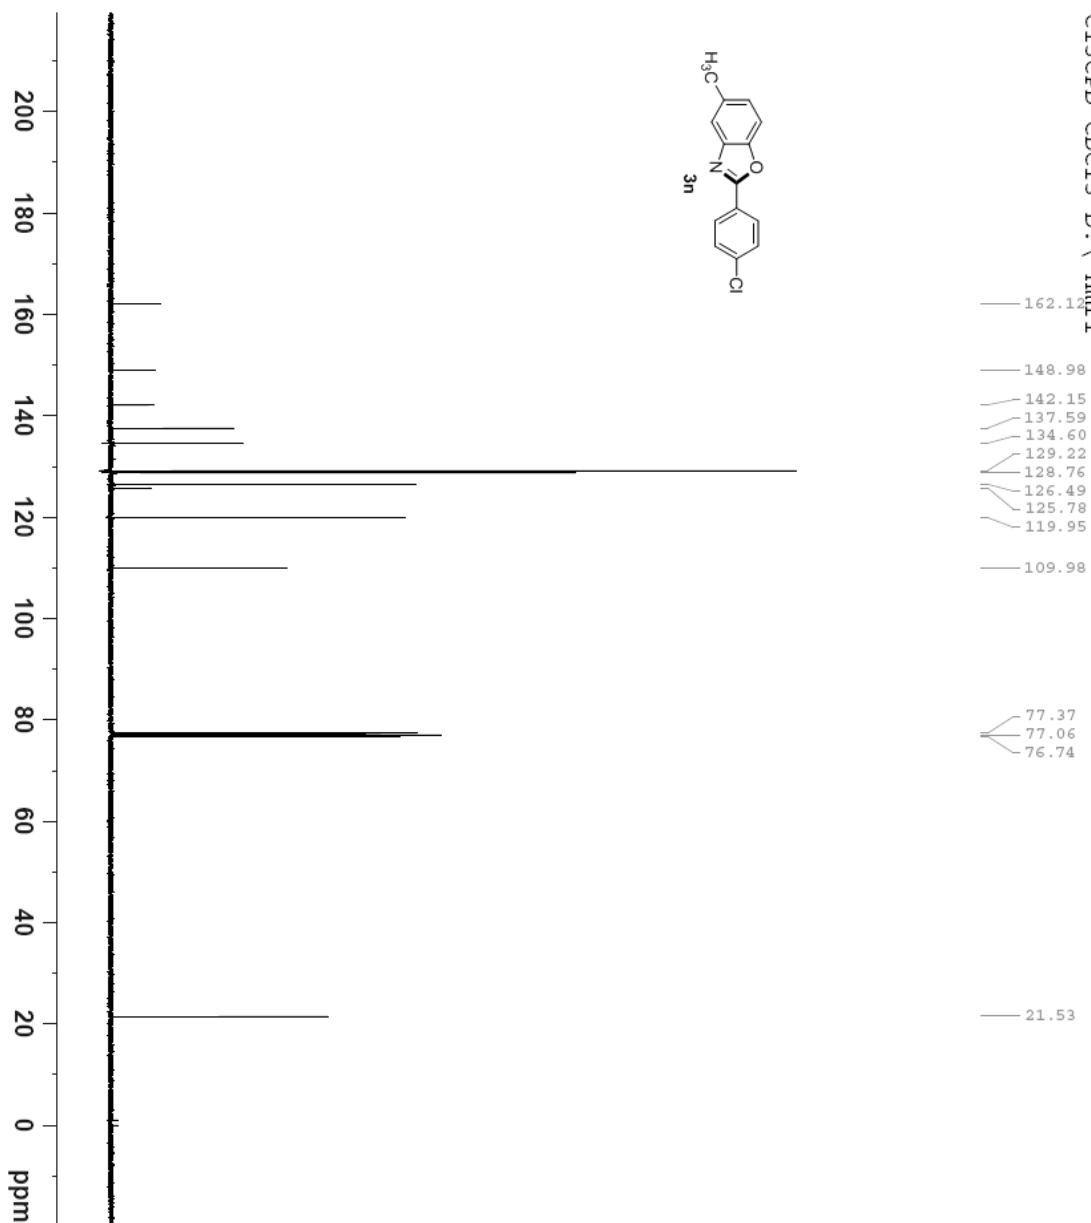

PROTON CDCl3

D:\nmr1

- 8.258
- 8.255
- 8.250
- 8.241
- 8.235
- 7.704
- 7.683
- 7.614
- 7.609
- 7.580
- 7.577
- 7.564
- 7.559
- 7.545
- 7.531
- 7.369
- 7.364
- 7.348
- 7.343
- 7.285

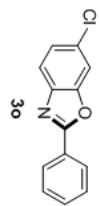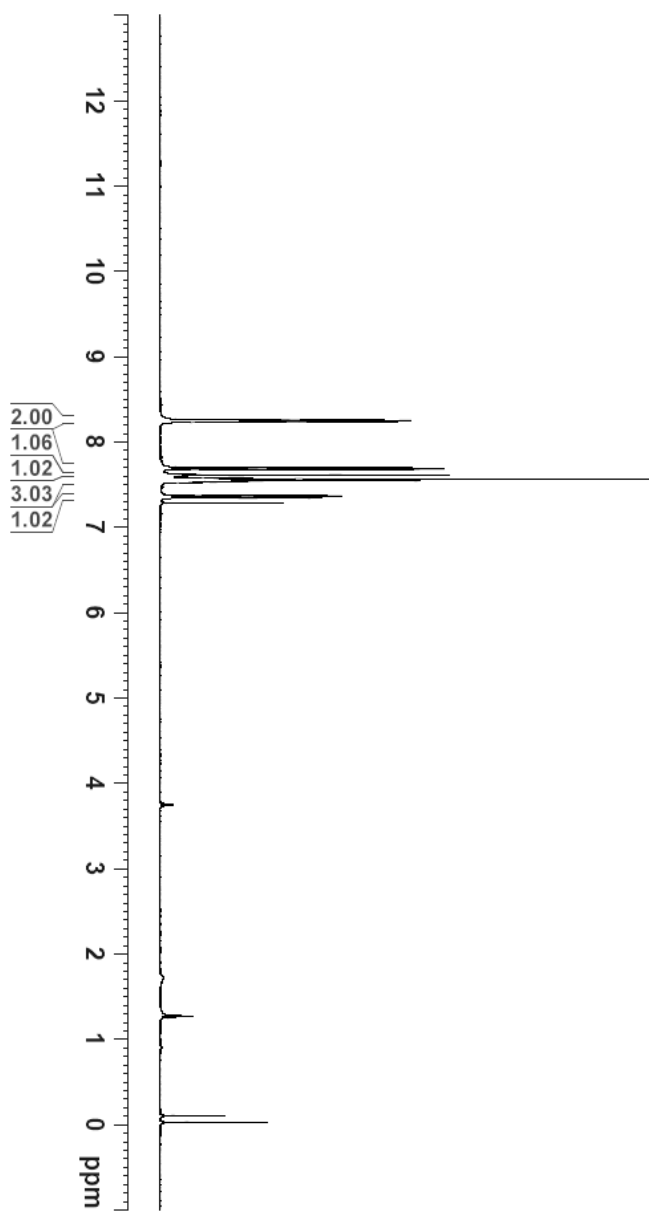



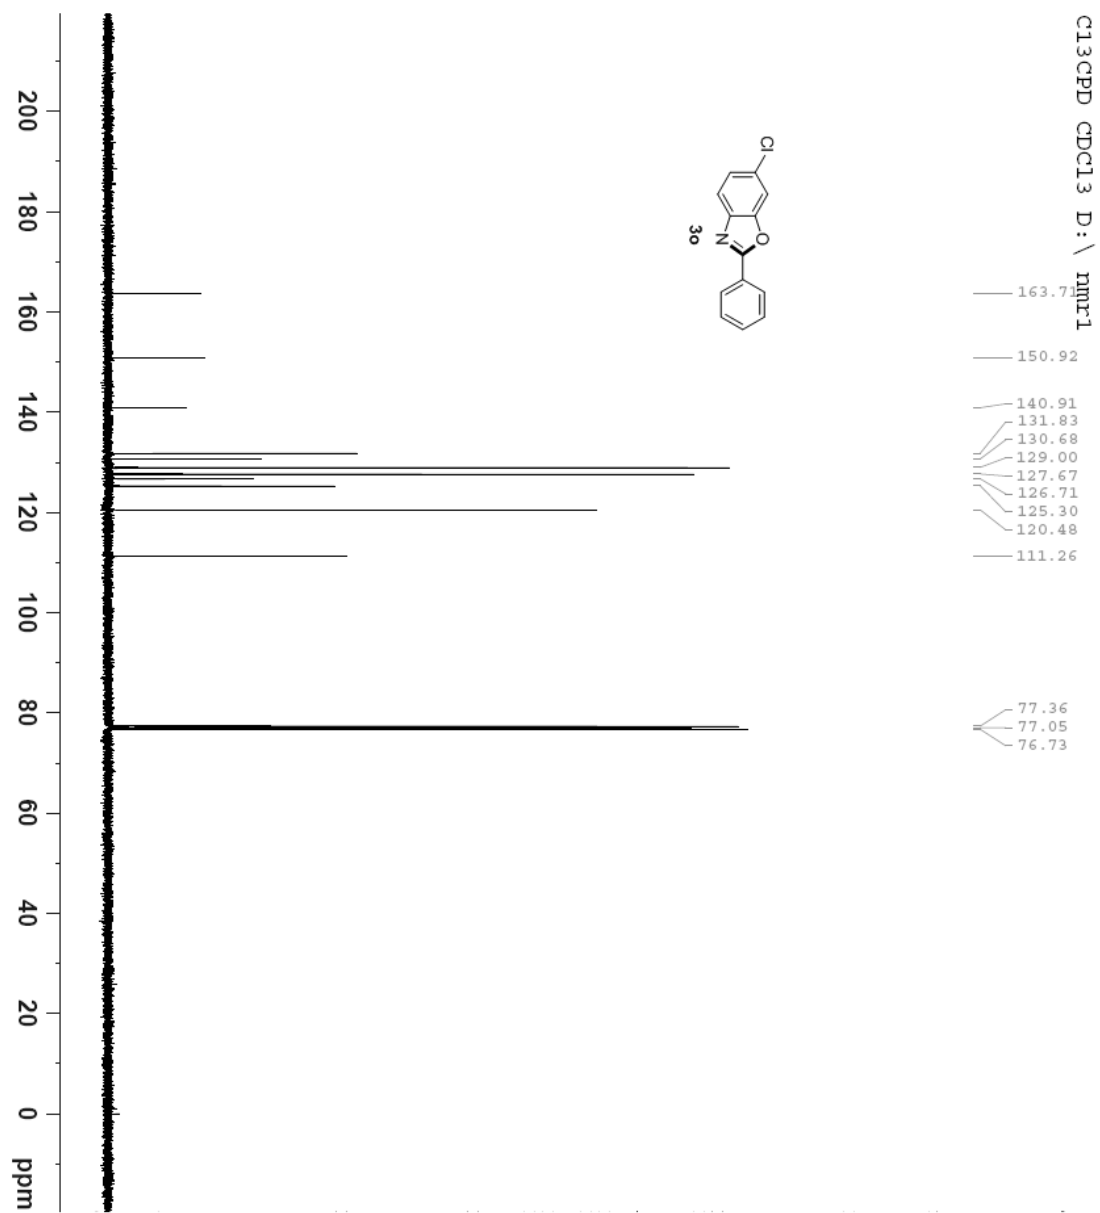

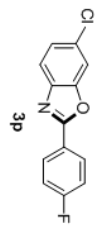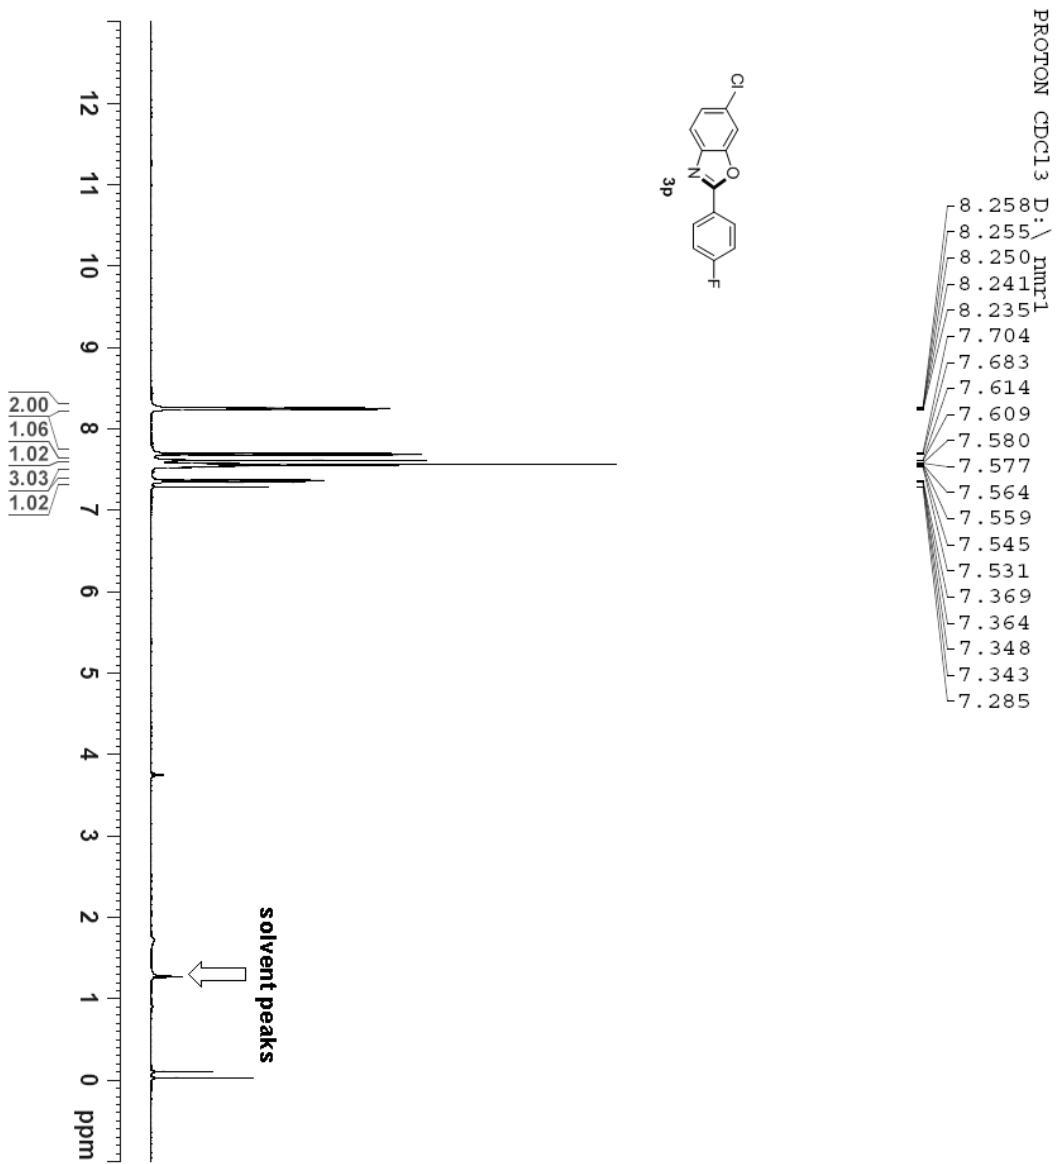

C13CPD CDCl3 D: \ nmr1

- 163.71
- 150.92
- 140.91
- 131.83
- 130.68
- 129.00
- 127.67
- 126.71
- 125.30
- 120.48
- 111.26
- 77.36
- 77.05
- 76.73

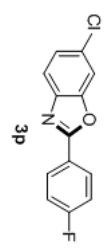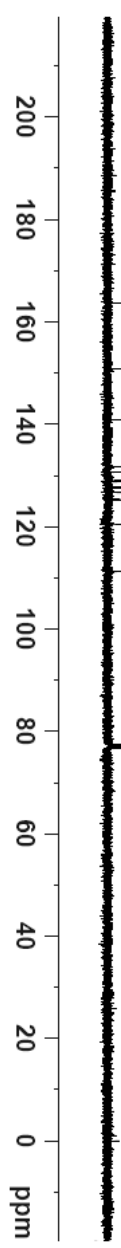

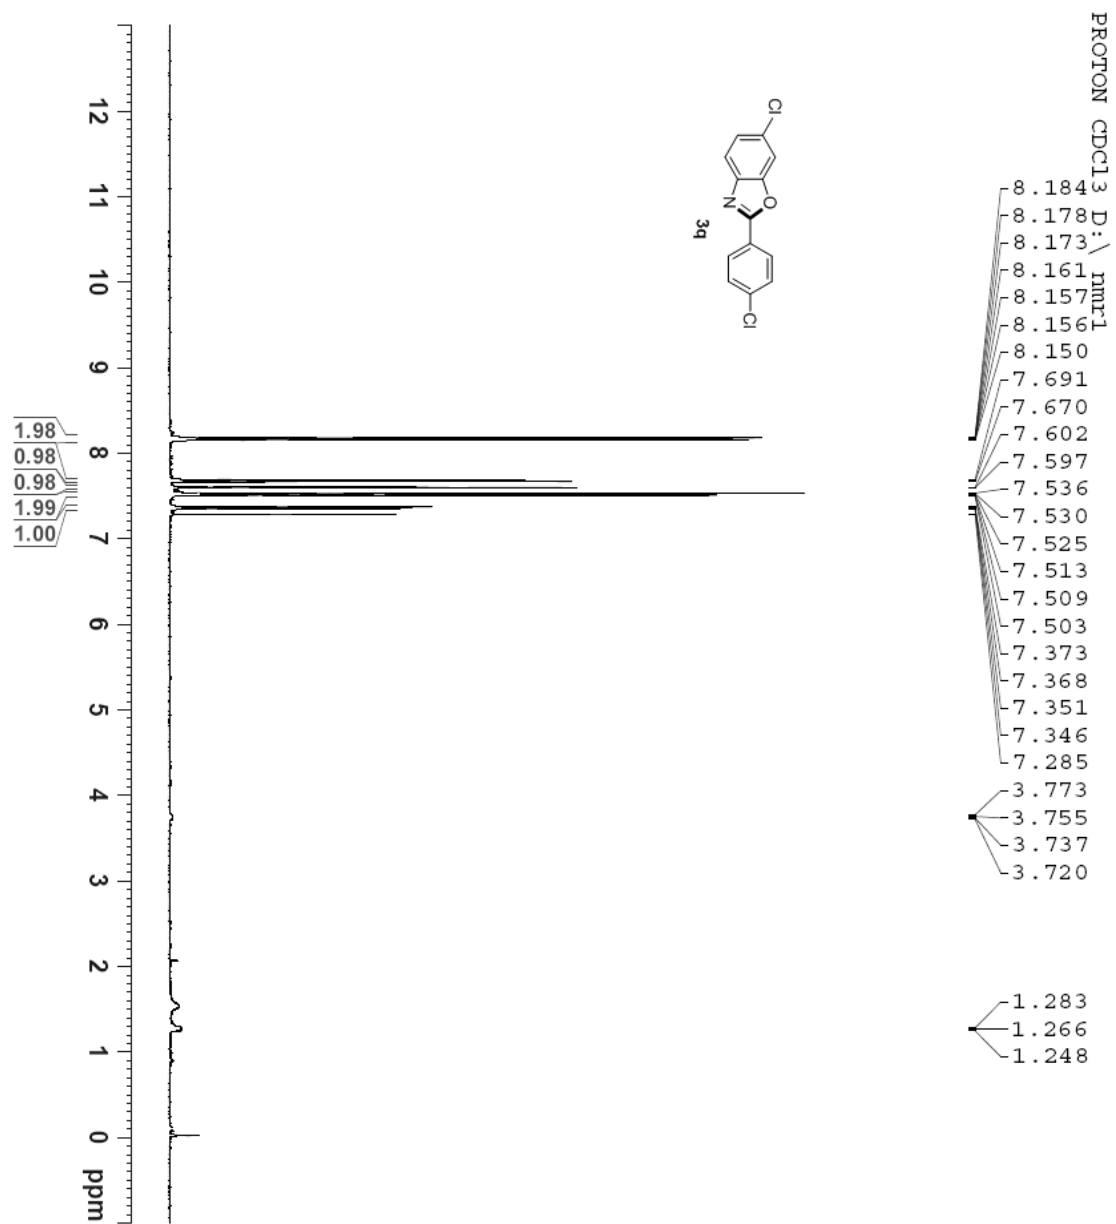

C13CPD CDCl3 D: \ nmr1

- 162.73
- 150.90
- 140.79
- 138.12
- 130.96
- 129.37
- 128.88
- 125.49
- 125.19
- 120.56
- 111.29
  
- 77.35
- 77.04
- 76.72

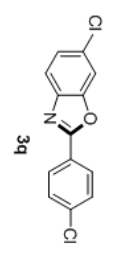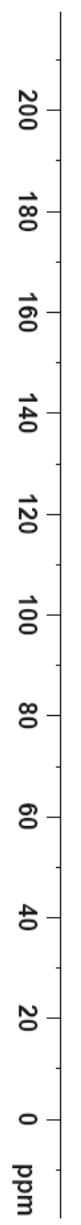

PROTON CDCl3 D: \ nmr1

8.108  
8.102  
8.097  
8.085  
8.081  
8.075  
7.696  
7.690  
7.669  
7.599  
7.594  
7.371  
7.367  
7.350  
7.345  
7.285

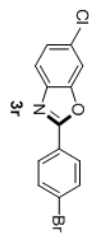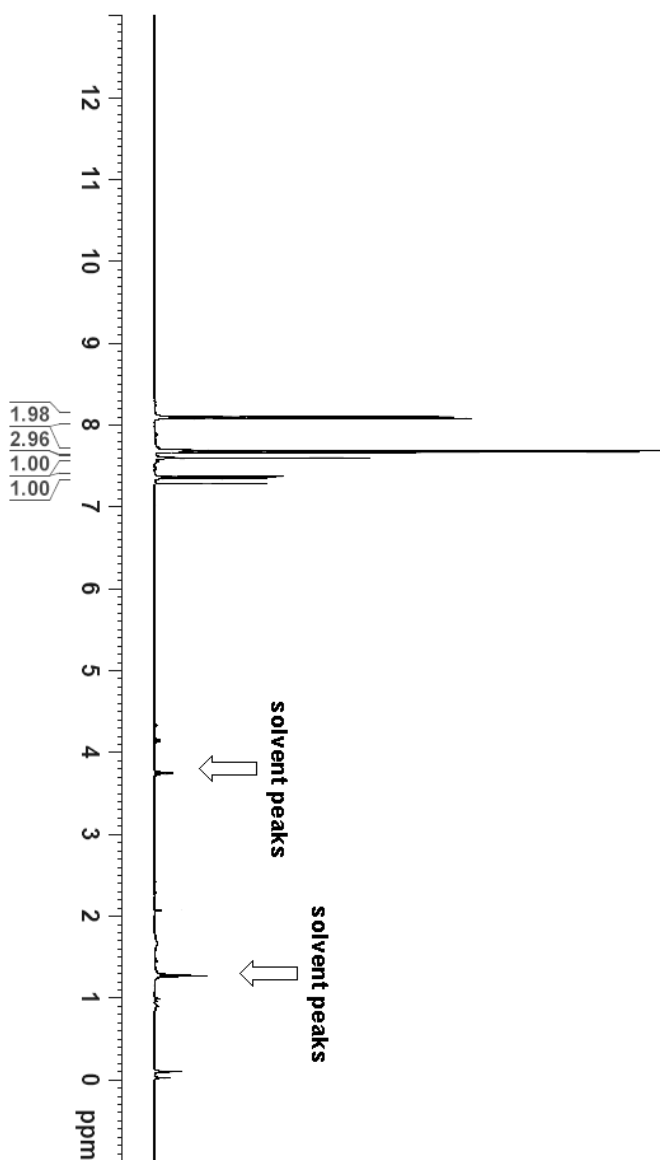

PROTON CDCl3 D: \ nmr1

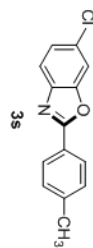

8.136  
8.116  
7.680  
7.659  
7.590  
7.586  
7.356  
7.353  
7.348  
7.336  
7.332  
7.327  
7.285

2.460

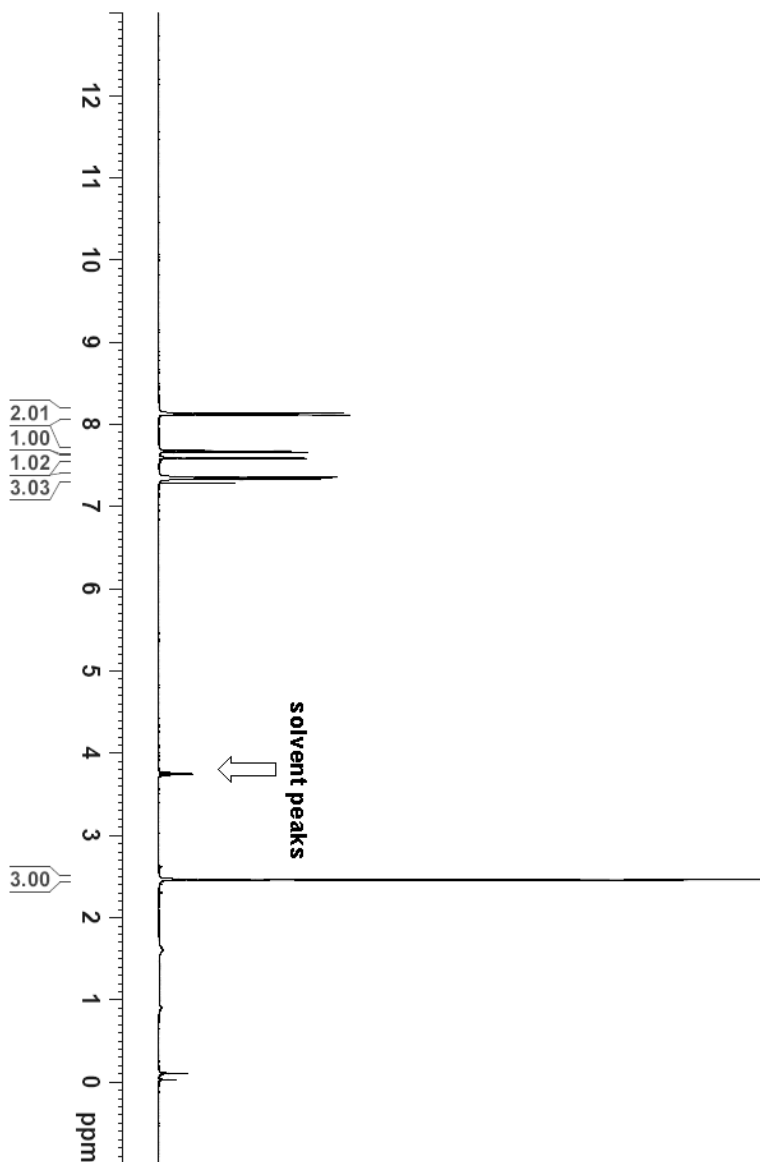

C13CPD CDCl3 D: \ mp11

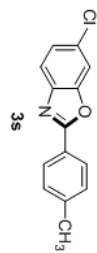

- 163.99
- 150.86
- 142.46
- 140.97
- 130.41
- 129.73
- 127.64
- 125.18
- 123.92
- 120.28
- 111.16
  
- 77.36
- 77.04
- 76.72
  
- 21.69

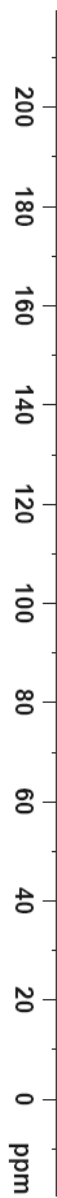



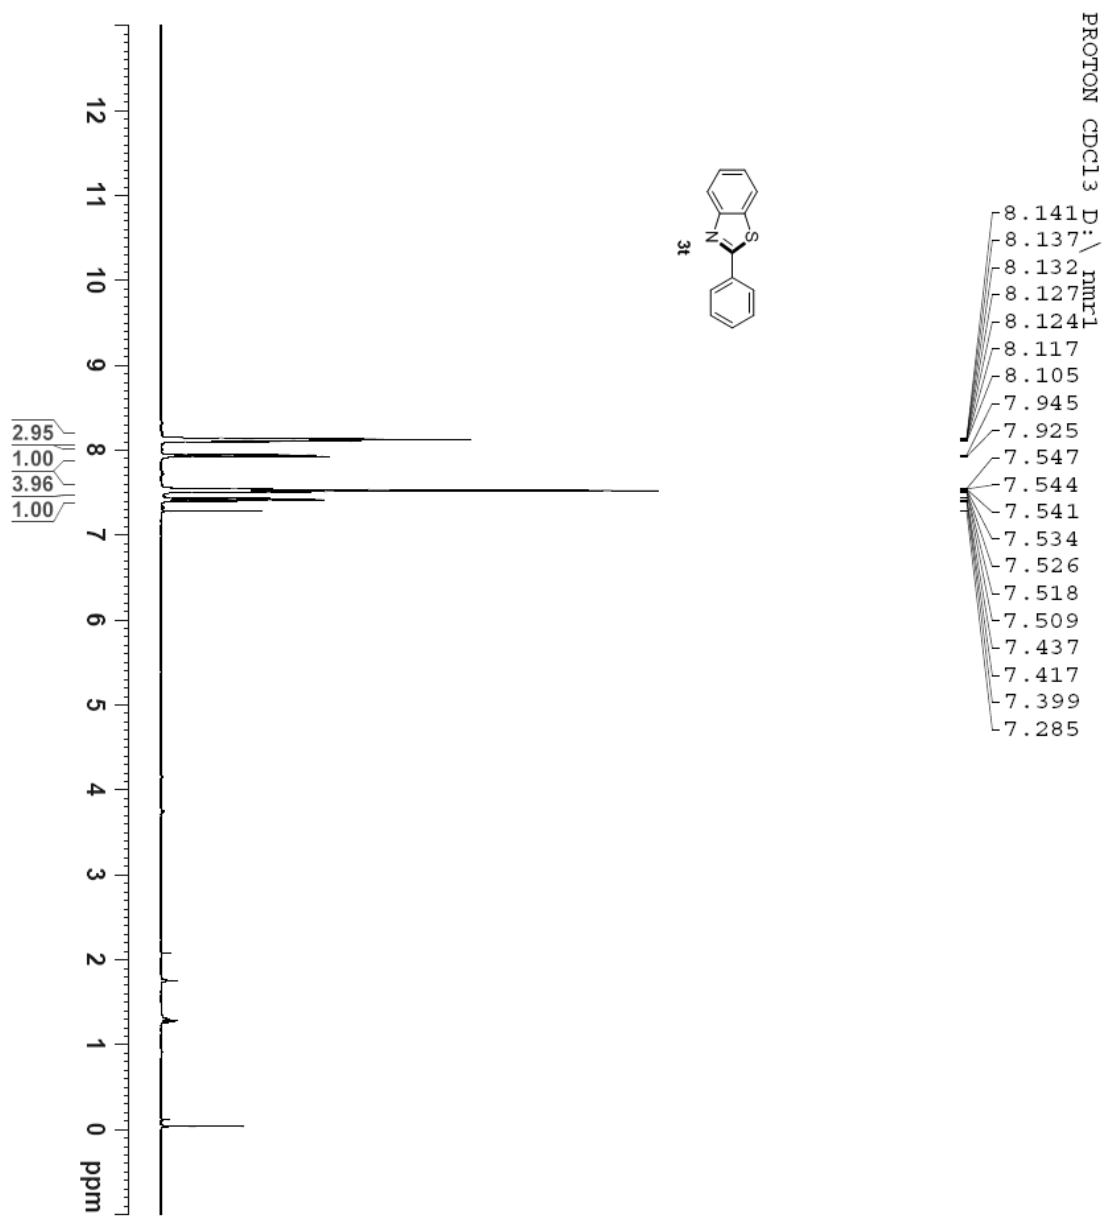

C13CPD CDCl3 D: \ jmmr1

- 168.09
- 154.16
- 135.09
- 133.64
- 131.00
- 129.05
- 127.58
- 126.34
- 125.21
- 123.26
- 121.65
- 77.38
- 77.06
- 76.74

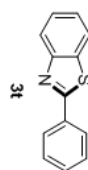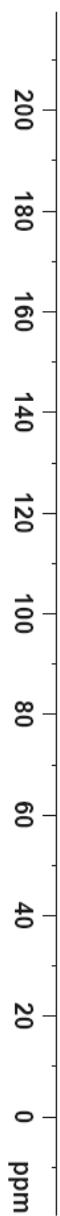

PROTON CDCl3 D: \ nmr1

8.101  
8.081  
8.026  
8.006  
7.926  
7.906  
7.531  
7.528  
7.510  
7.492  
7.489  
7.417  
7.414  
7.396  
7.379  
7.376  
7.334  
7.314  
7.285

2.453

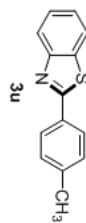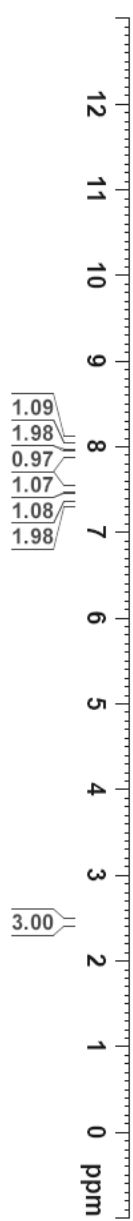

C13CPD CDCl3 D: \ nmr1

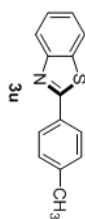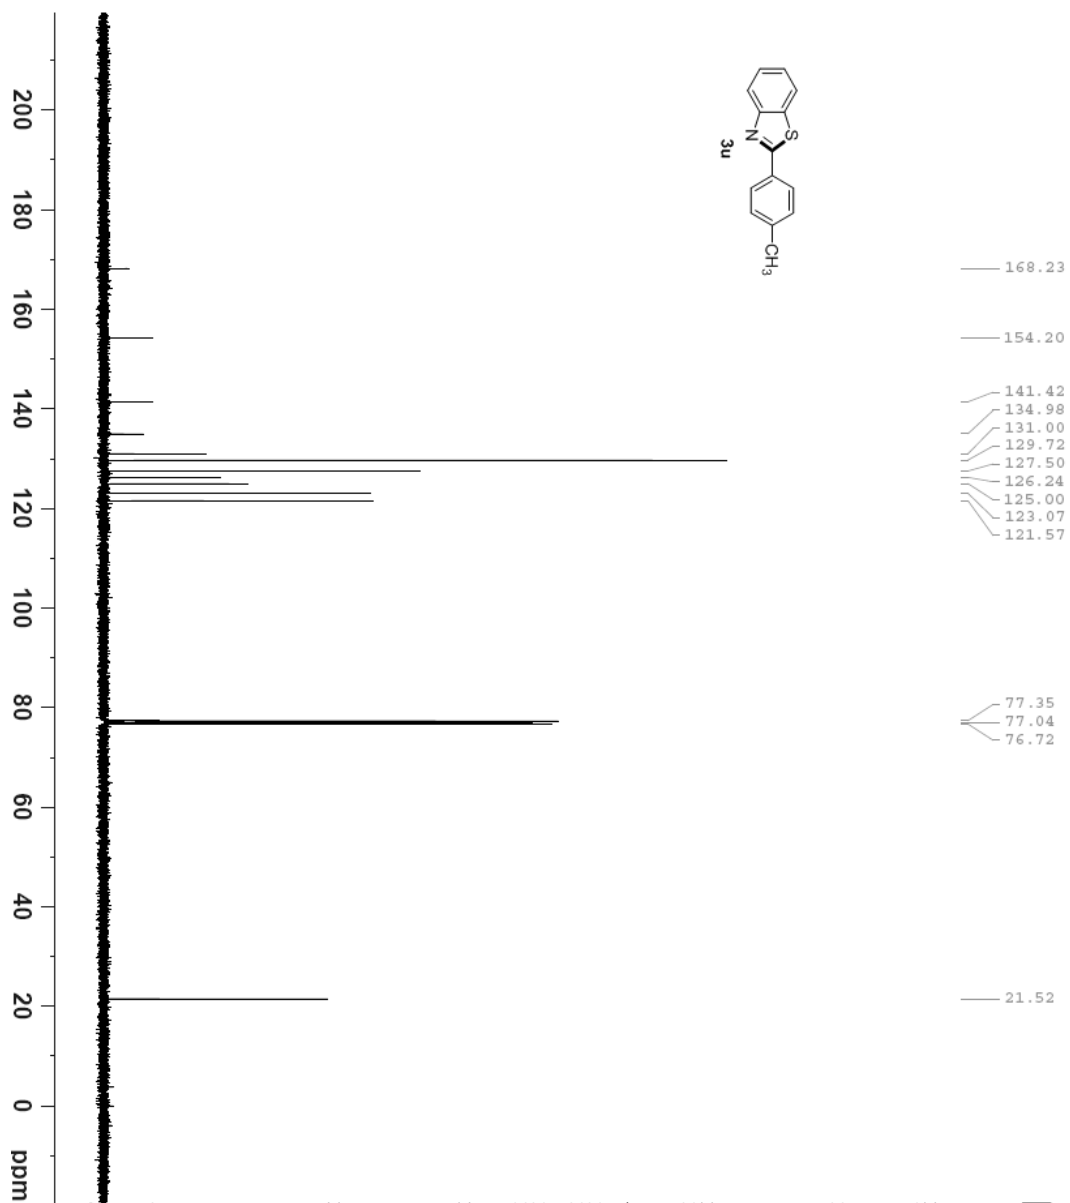

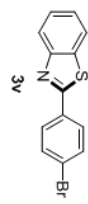

PROTON CDCl3 D: / nmr1  
8.103  
8.102  
8.083  
7.993  
7.987  
7.982  
7.970  
7.965  
7.959  
7.931  
7.930  
7.911  
7.910  
7.661  
7.655  
7.650  
7.638  
7.633  
7.627  
7.547  
7.544  
7.529  
7.527  
7.509  
7.506  
7.443  
7.440  
7.423  
7.405  
7.402  
7.285

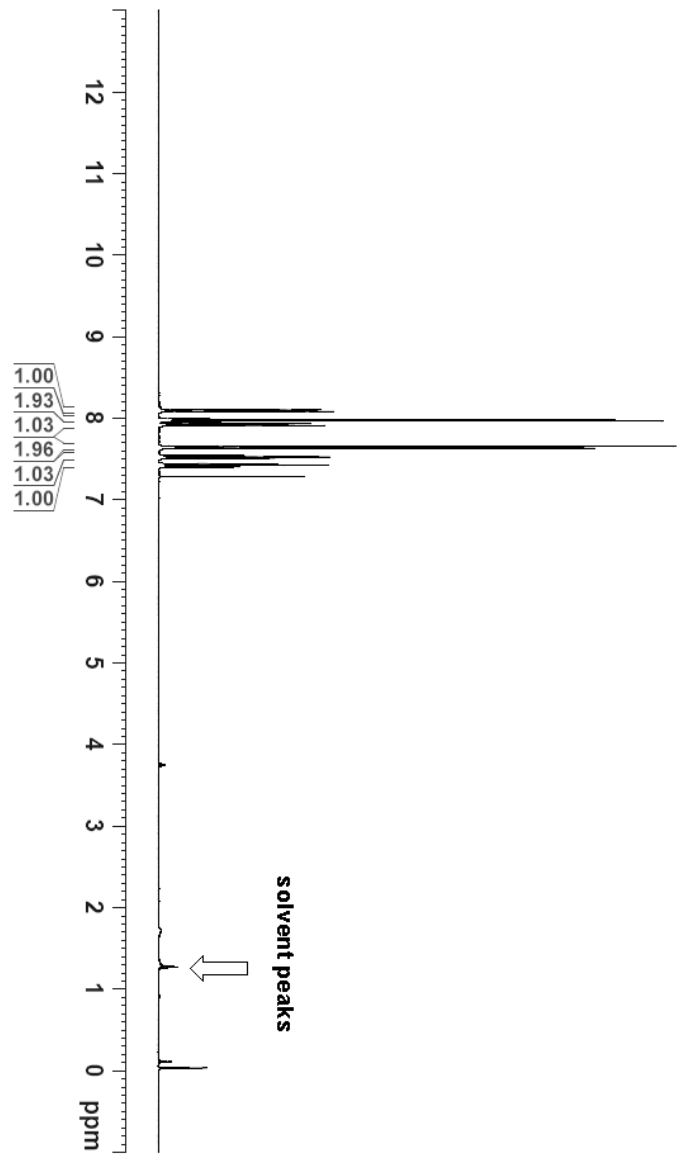

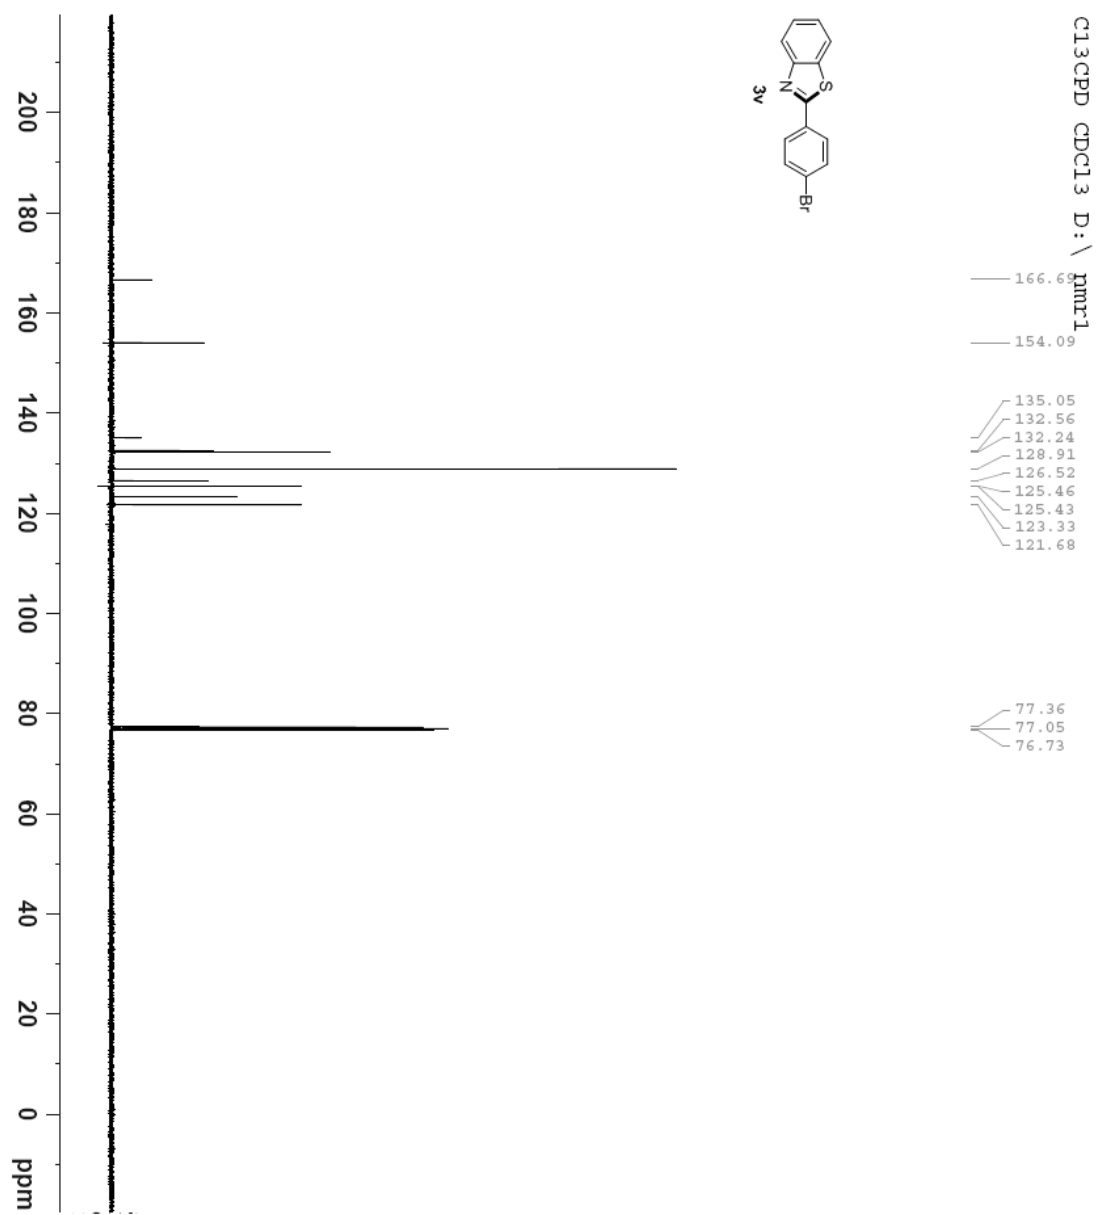

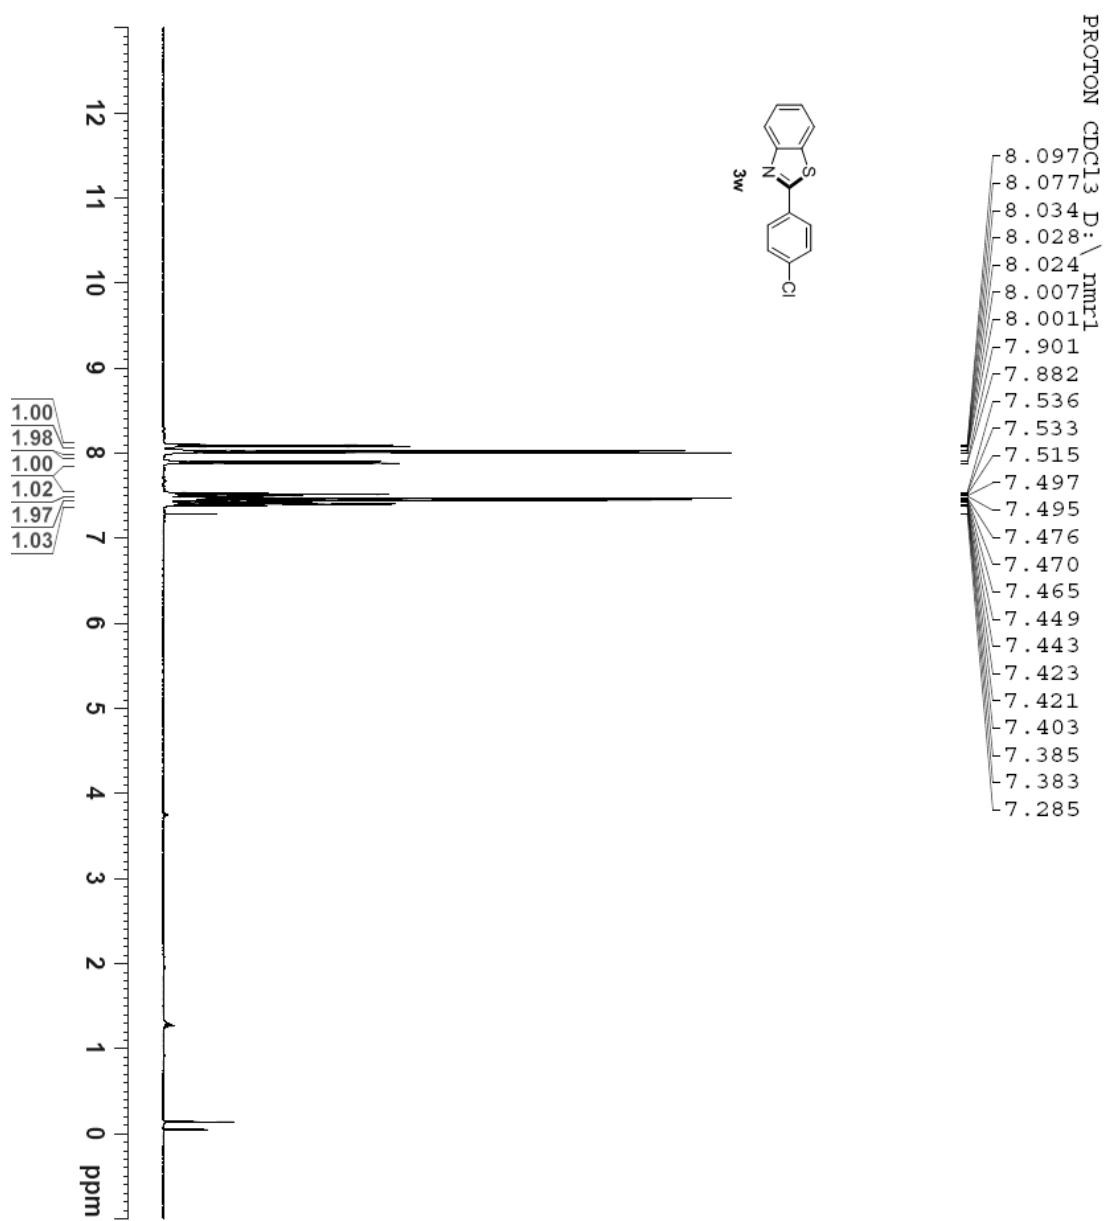

C13CPD CDCl3 D: \

nmr1

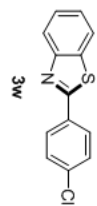

- 166.58
- 154.07
- 137.02
- 135.07
- 132.10
- 129.26
- 128.70
- 126.49
- 125.42
- 123.32
- 121.66
- 77.42
- 77.10
- 76.79

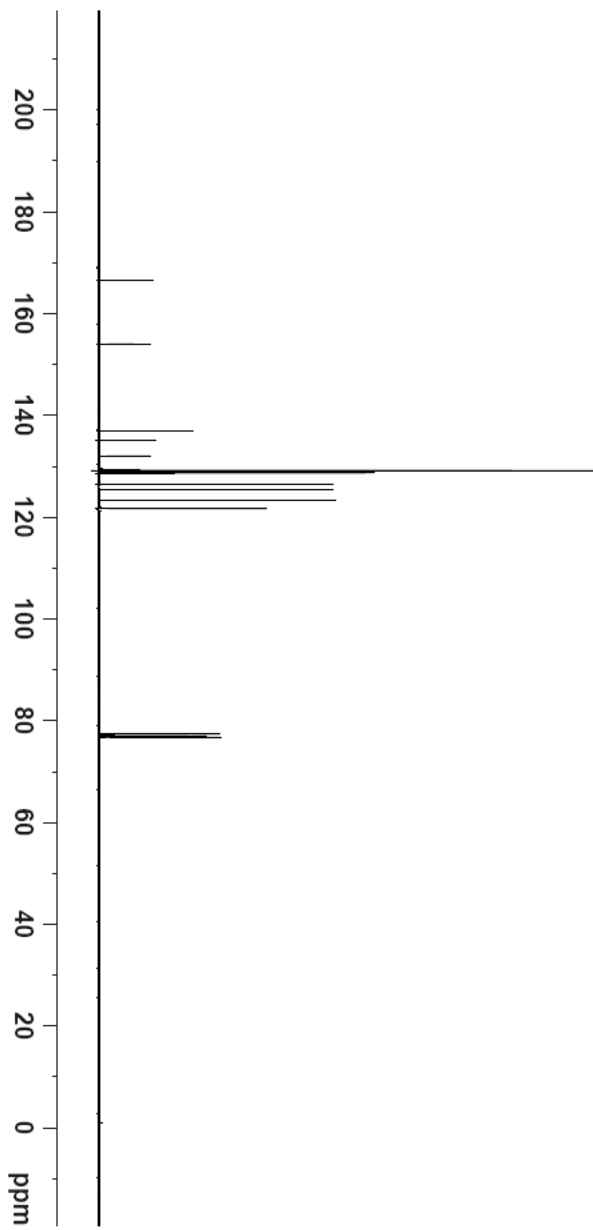



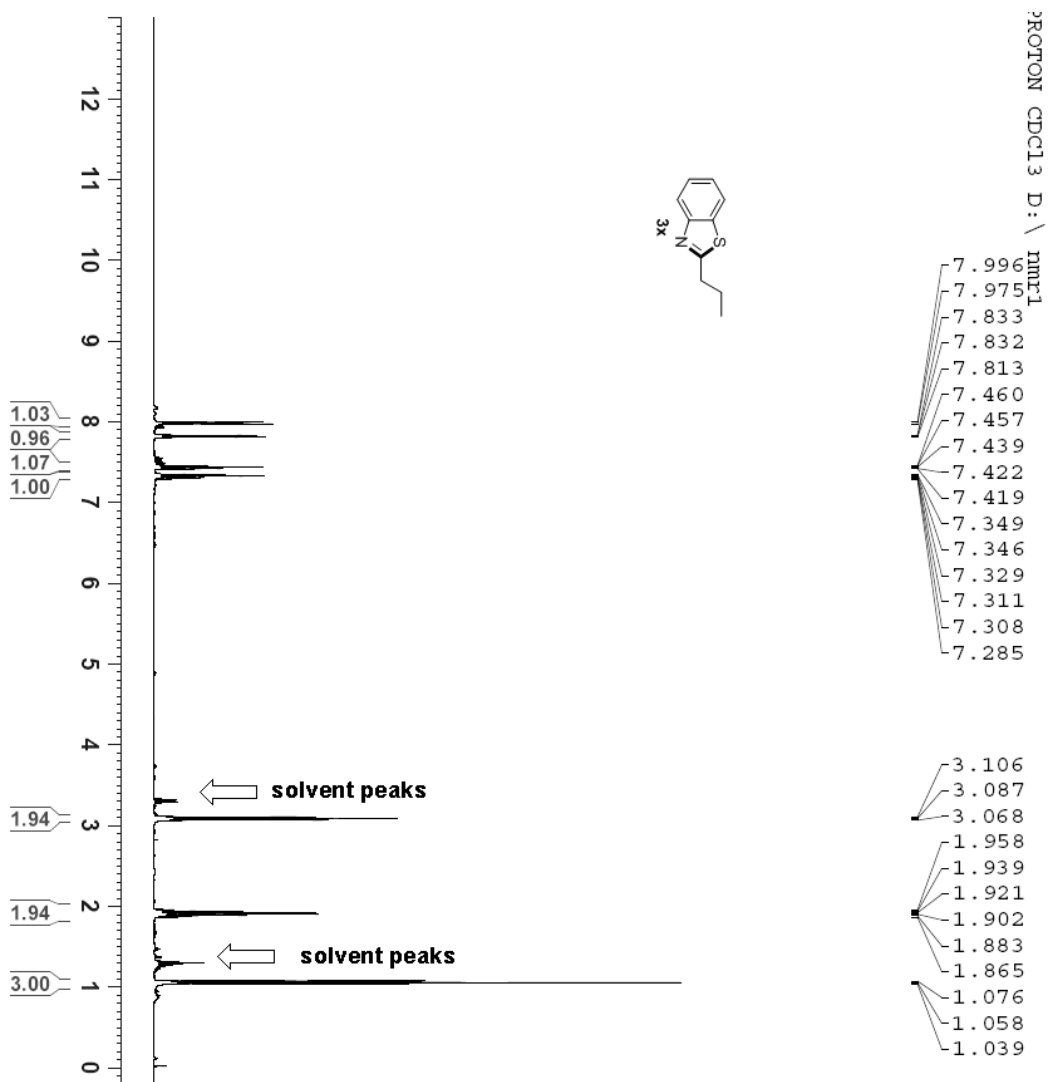

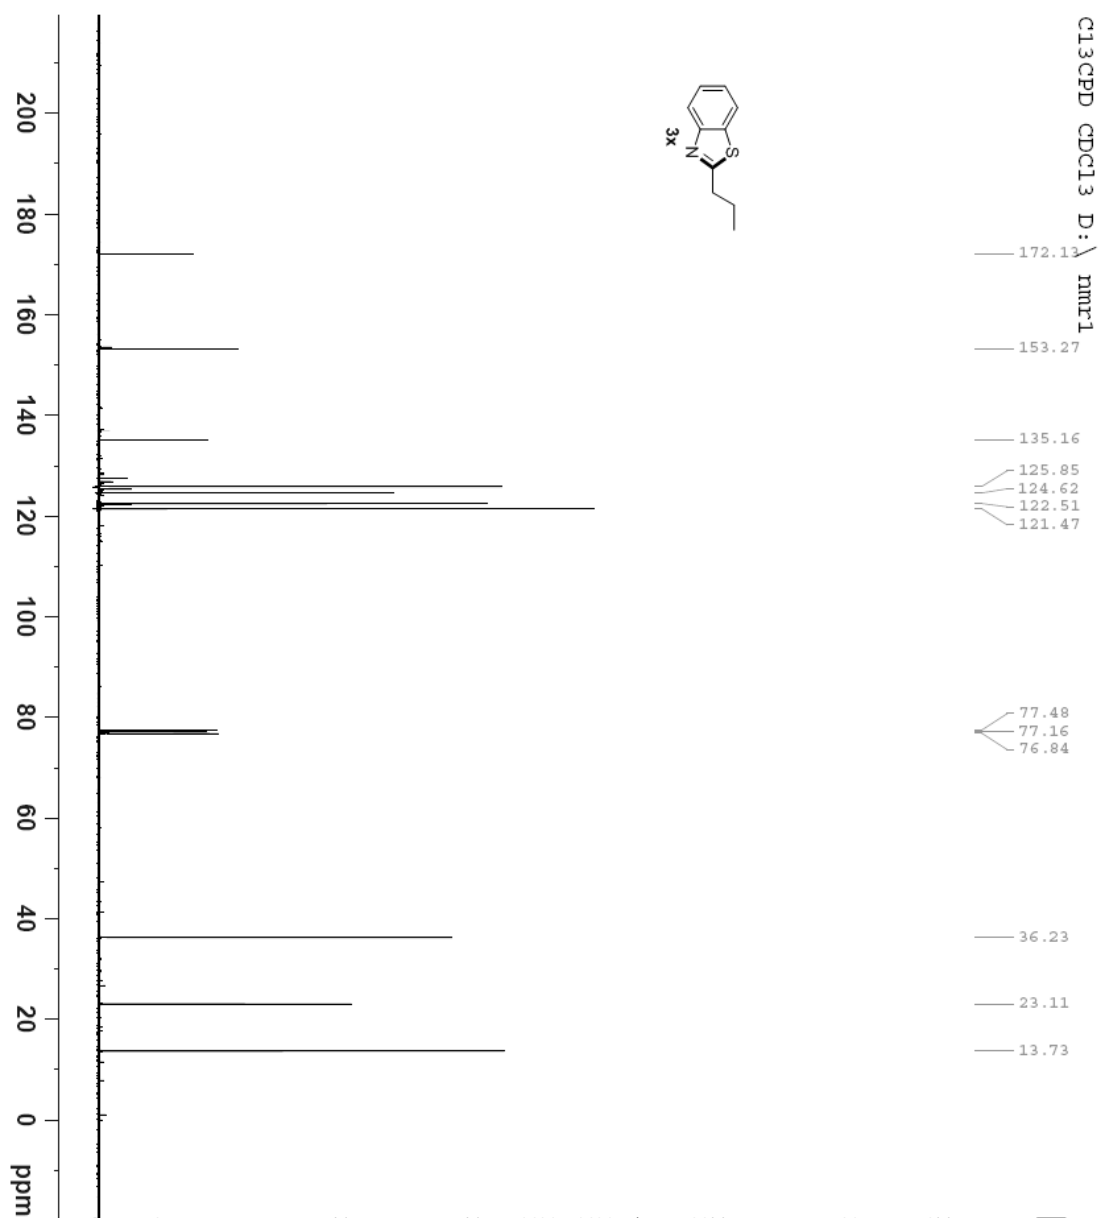

PROTON CDCl3 D: \ nmr1

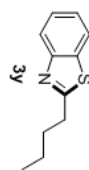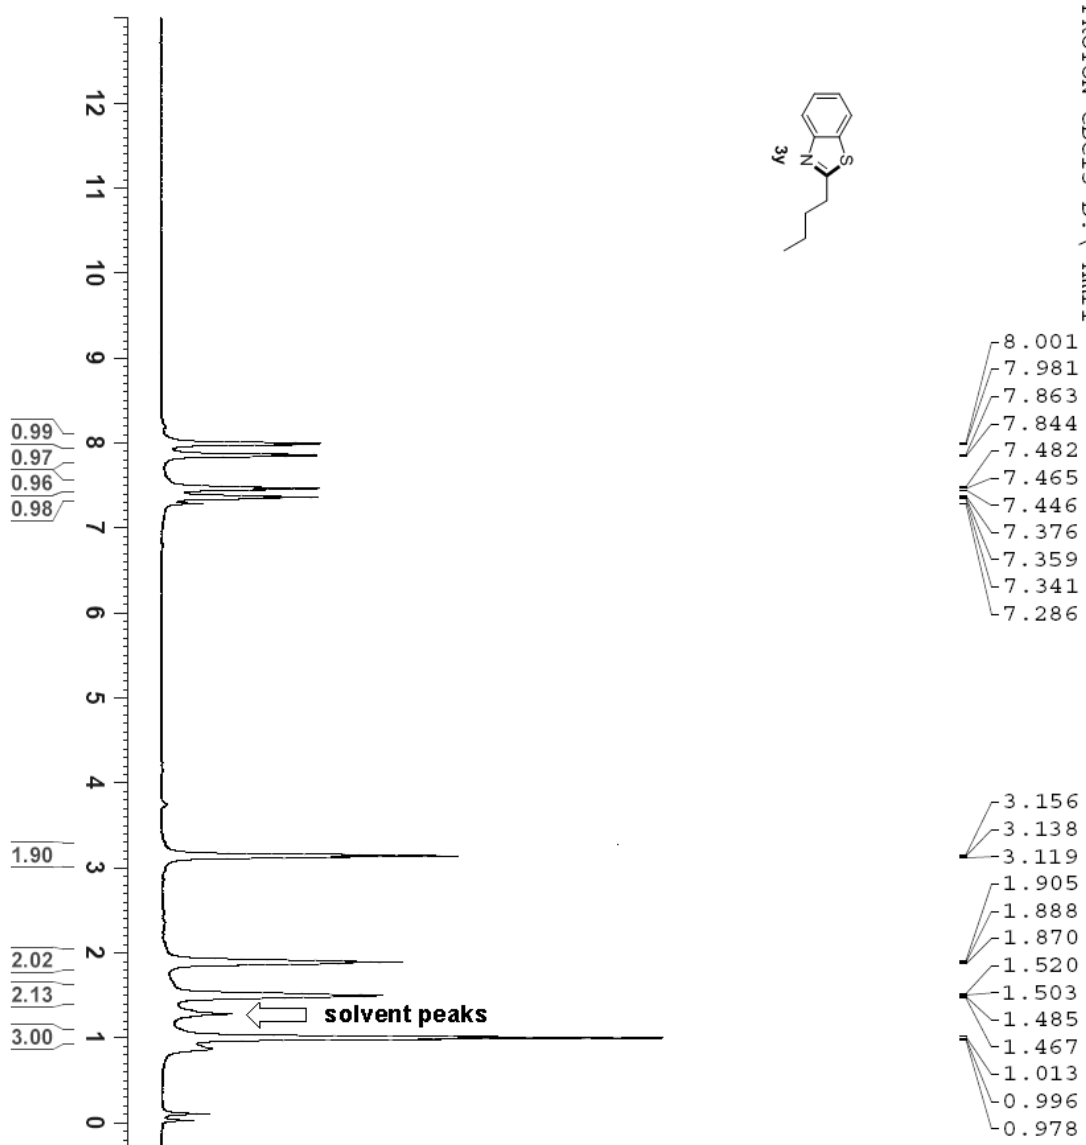

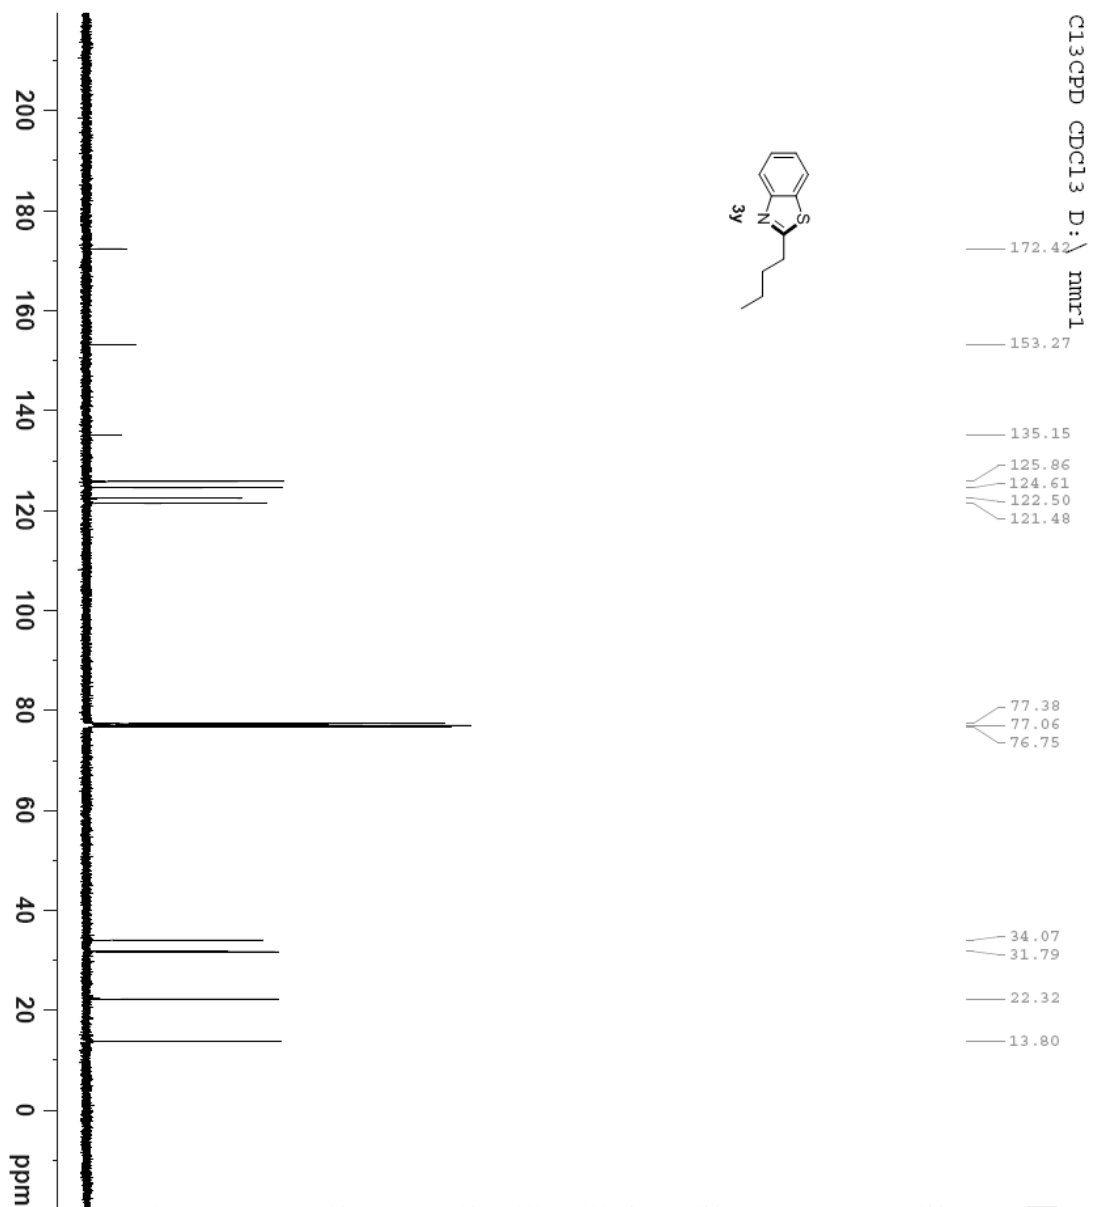

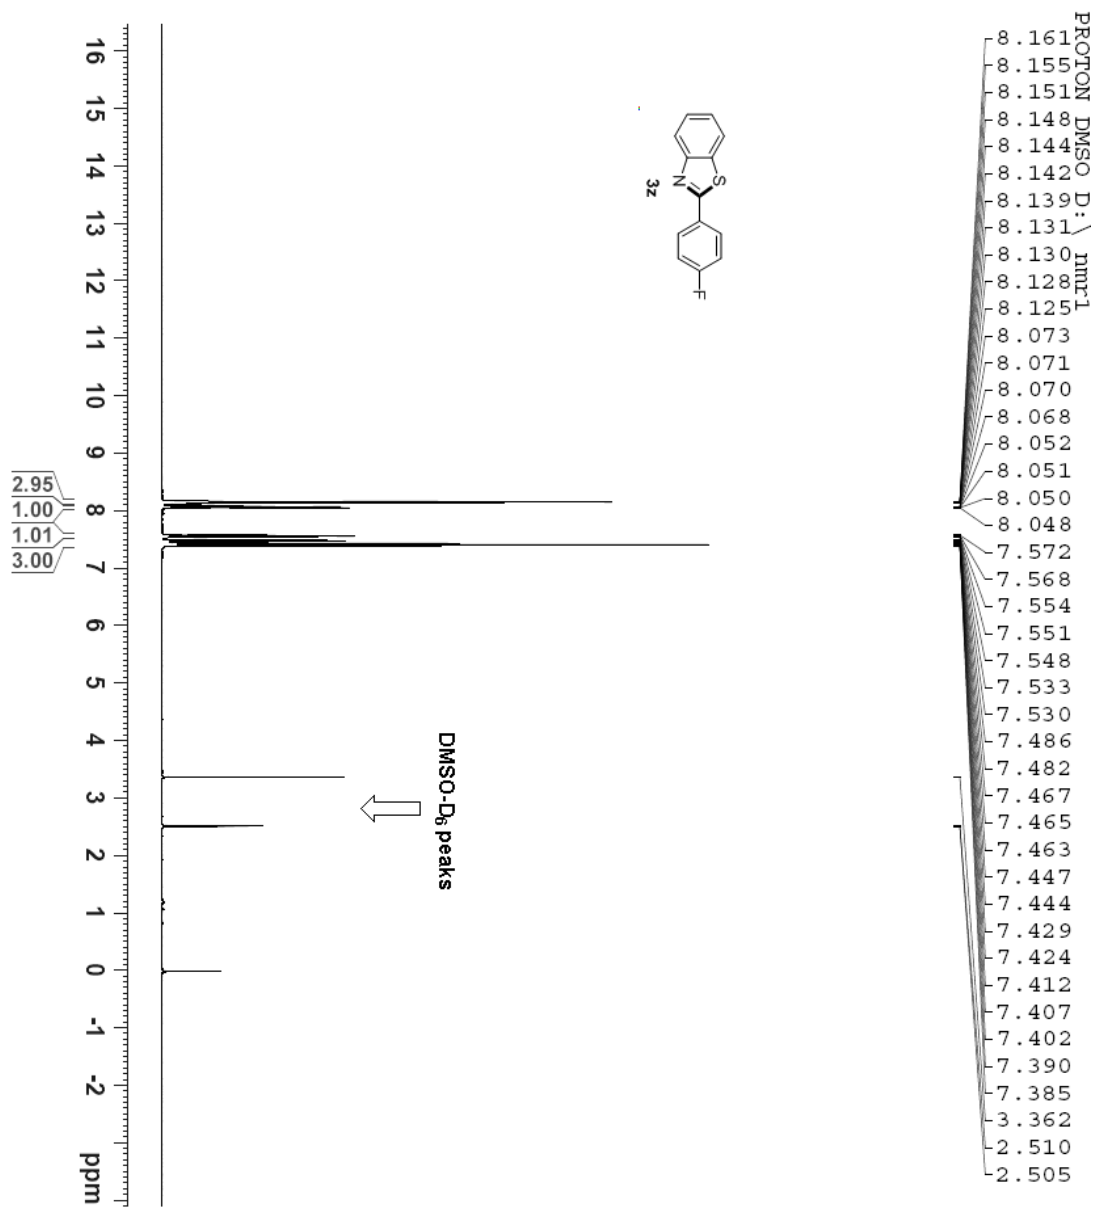

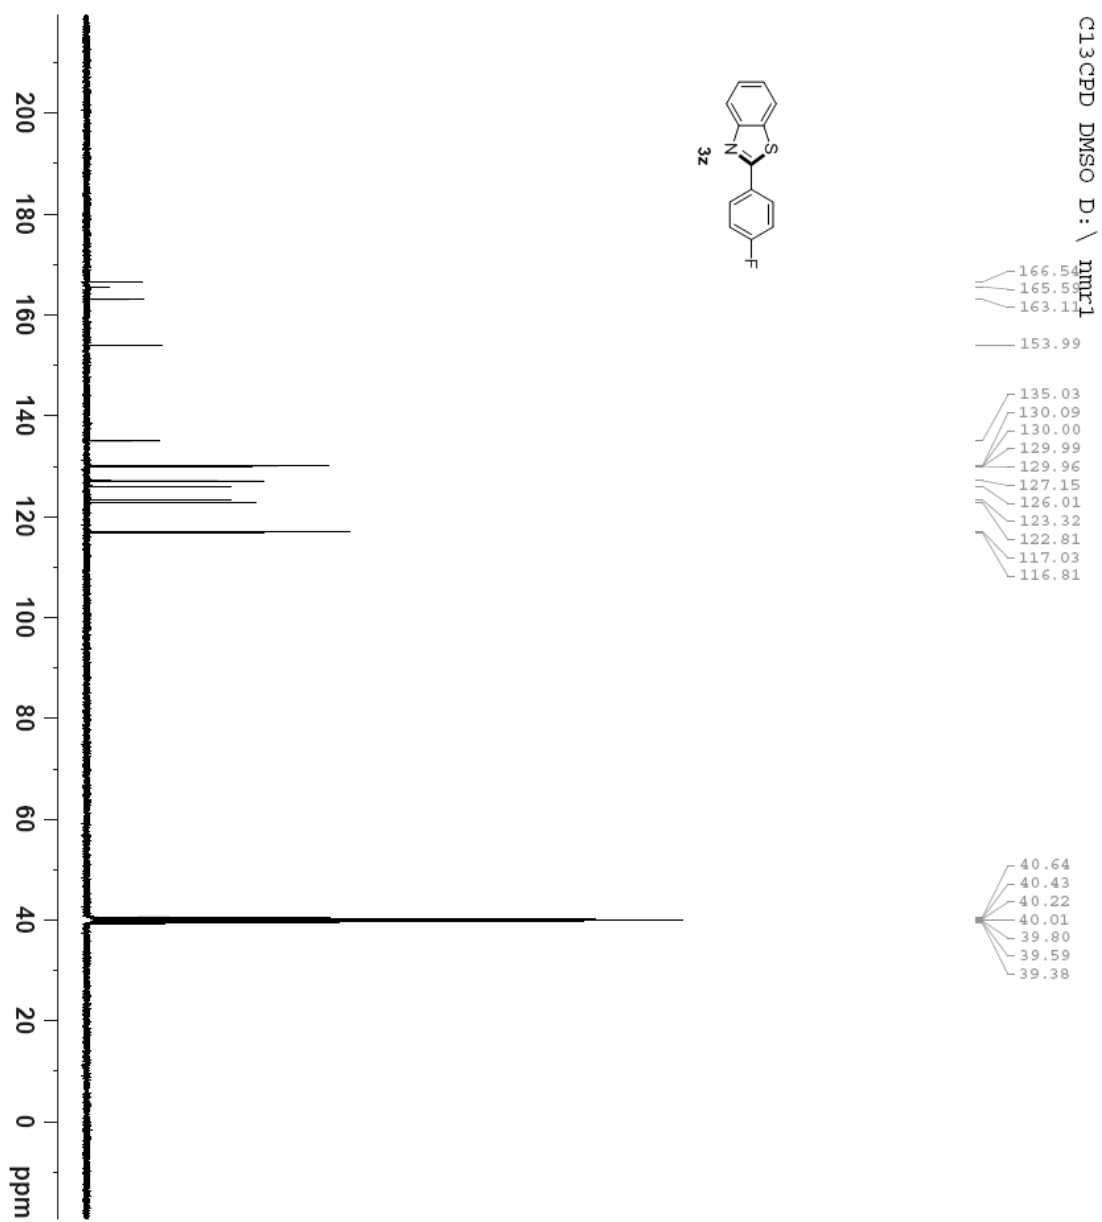

PROTON CDCl3 D:

nmr1  
8.180  
8.159  
7.987  
7.968  
7.641  
7.619  
7.604  
7.597  
7.581  
7.561  
7.543  
7.488  
7.468  
7.450  
7.285  
6.949  
6.942  
6.927  
6.920  
— 3.899

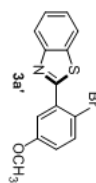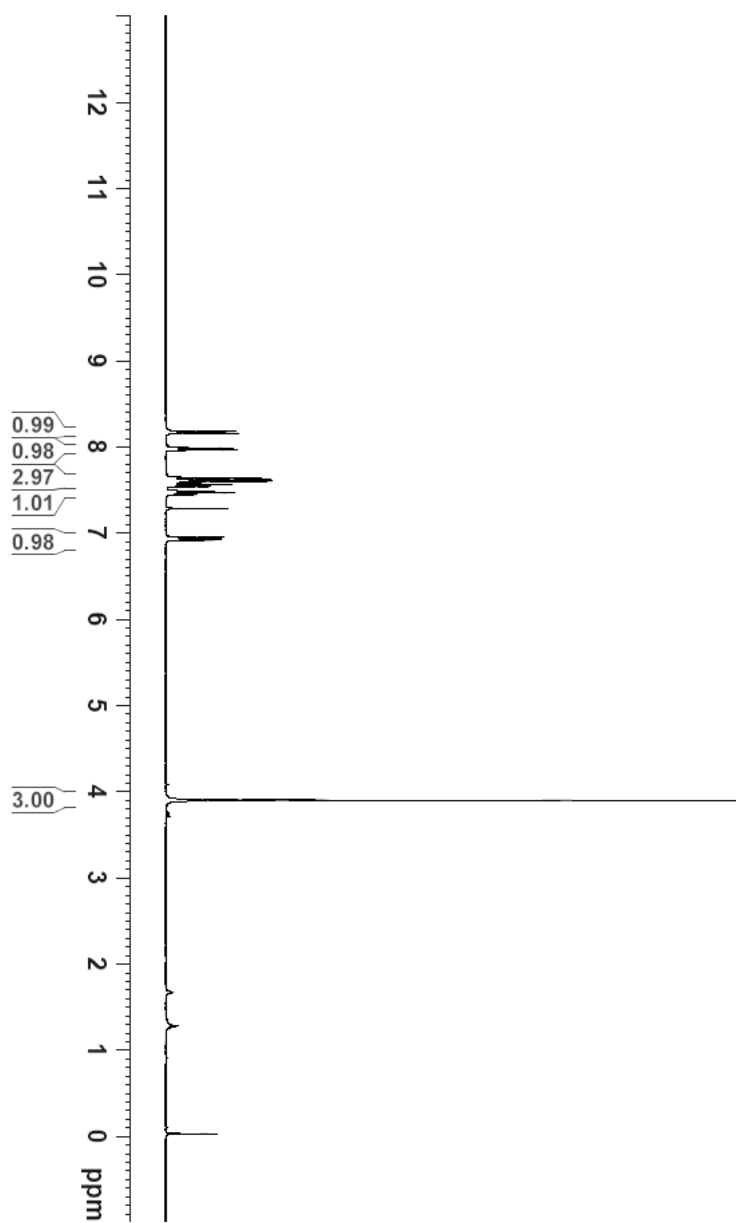

C13CPD CDCl3 D: \ nmr1

- 165.57
- 158.85
- 152.63
- 136.18
- 135.08
- 134.82
- 126.32
- 125.54
- 123.59
- 121.47
- 118.22
- 116.61
- 112.51
- 77.36
- 77.05
- 76.73
- 55.74

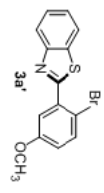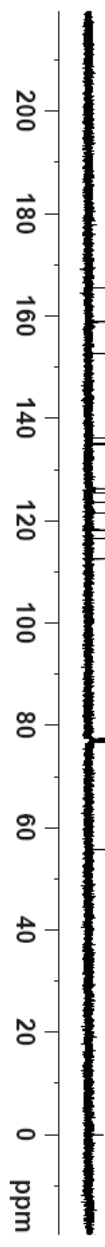



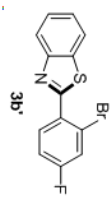

PROTON CDCl<sub>3</sub> D: \nmr1  
8.165  
8.145  
8.085  
8.070  
8.063  
8.048  
7.982  
7.962  
7.584  
7.581  
7.566  
7.563  
7.546  
7.543  
7.528  
7.522  
7.508  
7.501  
7.491  
7.489  
7.471  
7.453  
7.451  
7.285  
7.228  
7.222  
7.209  
7.207  
7.203  
7.200  
7.187  
7.181

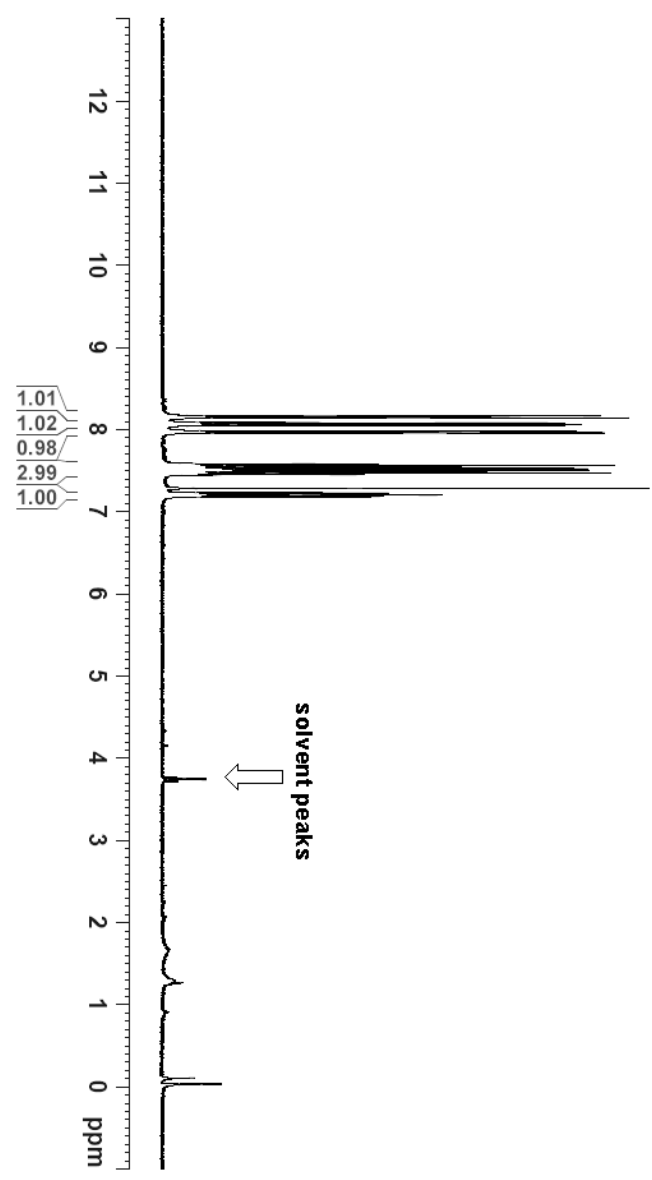

C13CPD CDCl3 D: \ pmr1

- 164.58
- 164.33
- 161.76
- 152.65
- 136.08
- 133.62
- 133.53
- 130.95
- 130.91
- 126.40
- 125.59
- 123.57
- 122.63
- 122.53
- 121.44
- 121.19
- 115.24
- 115.03
- 77.35
- 77.03
- 76.71

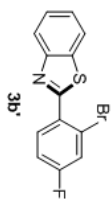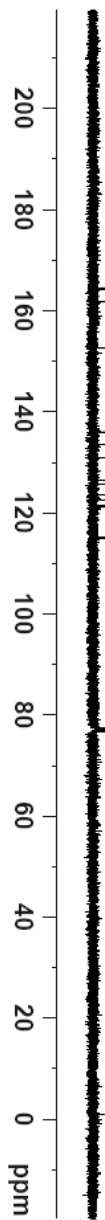

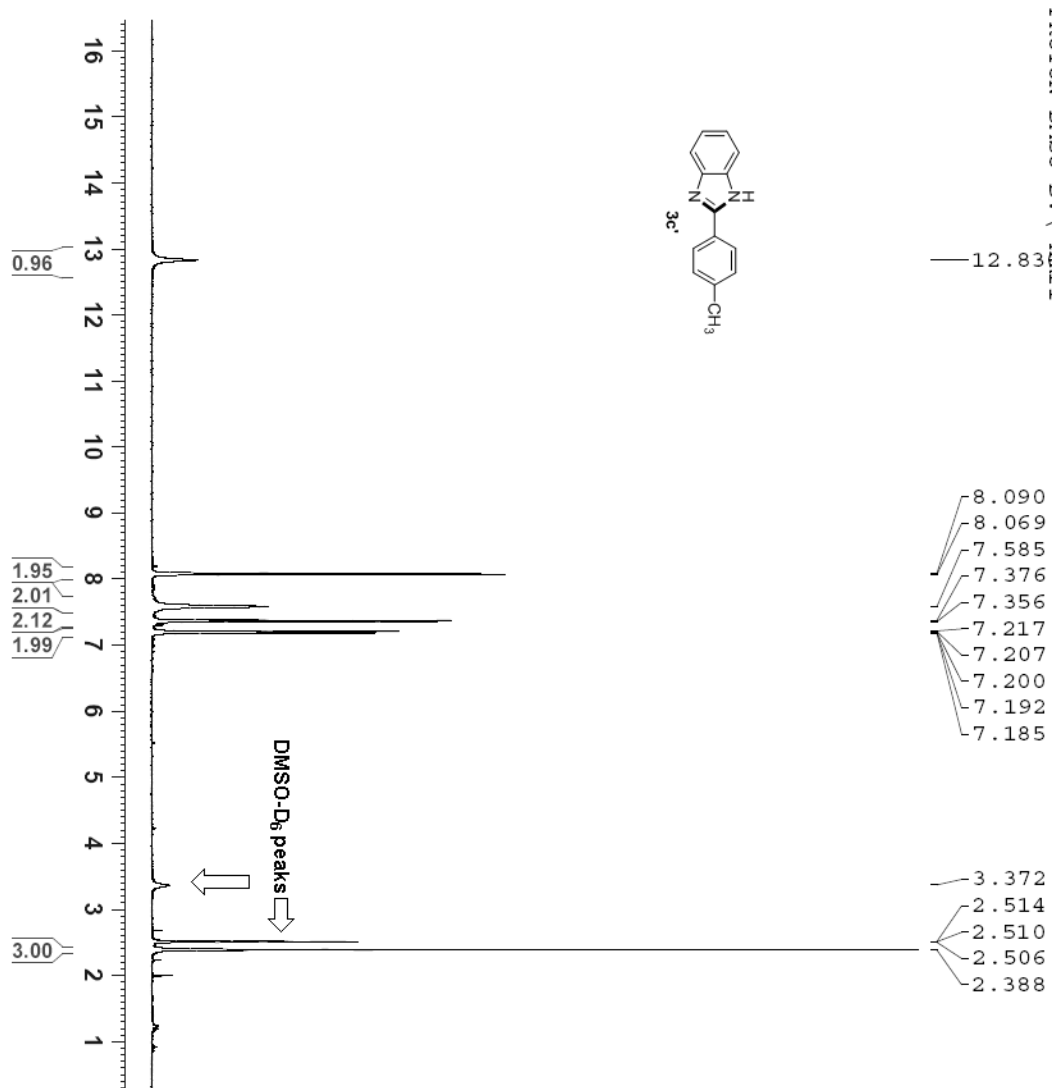

C13CPD DMSO D: \ nmr1

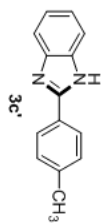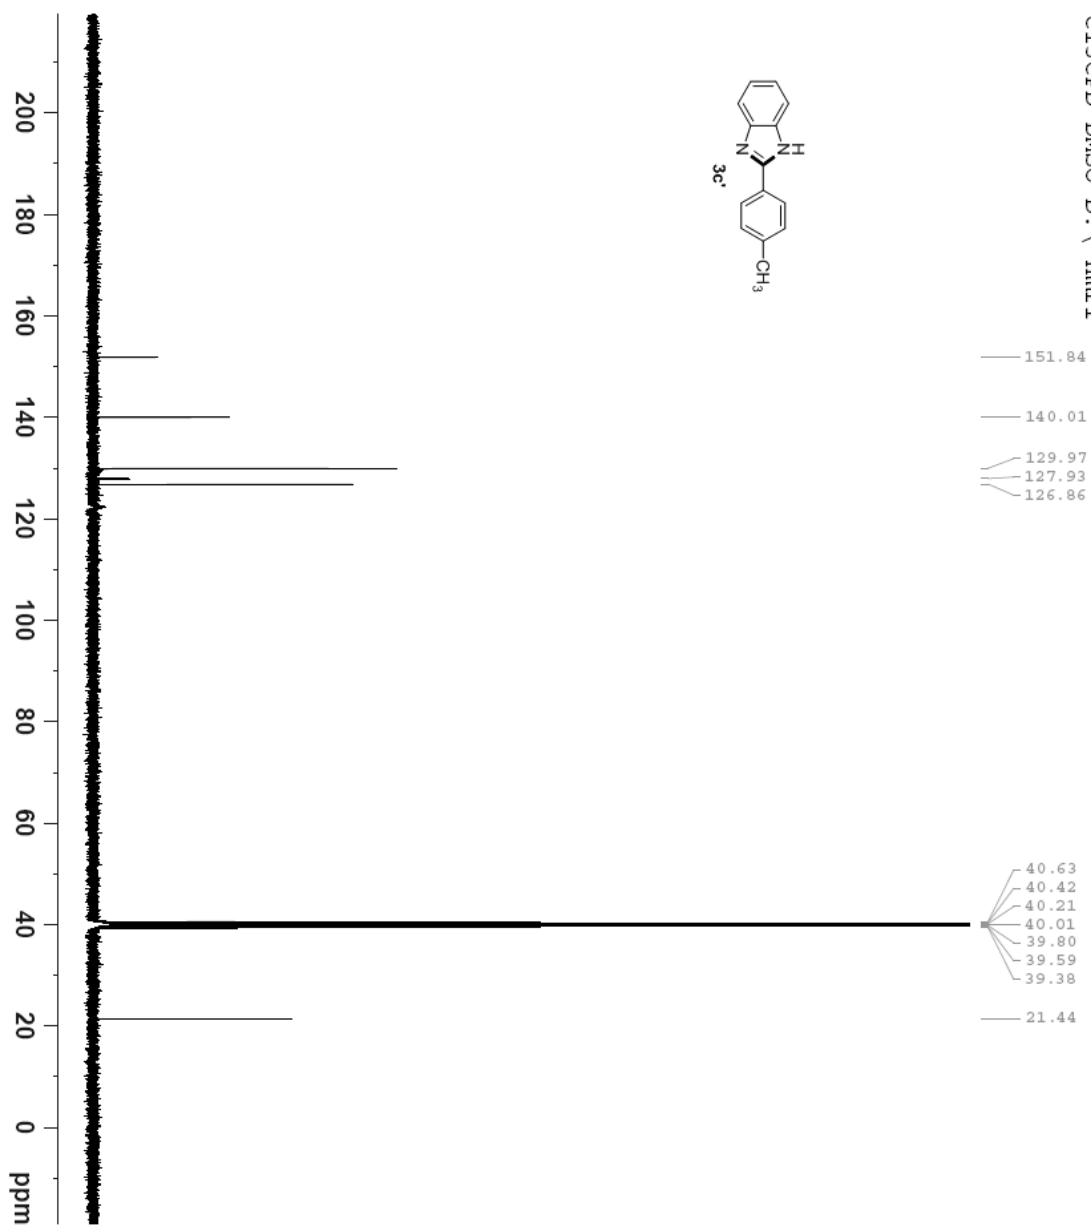

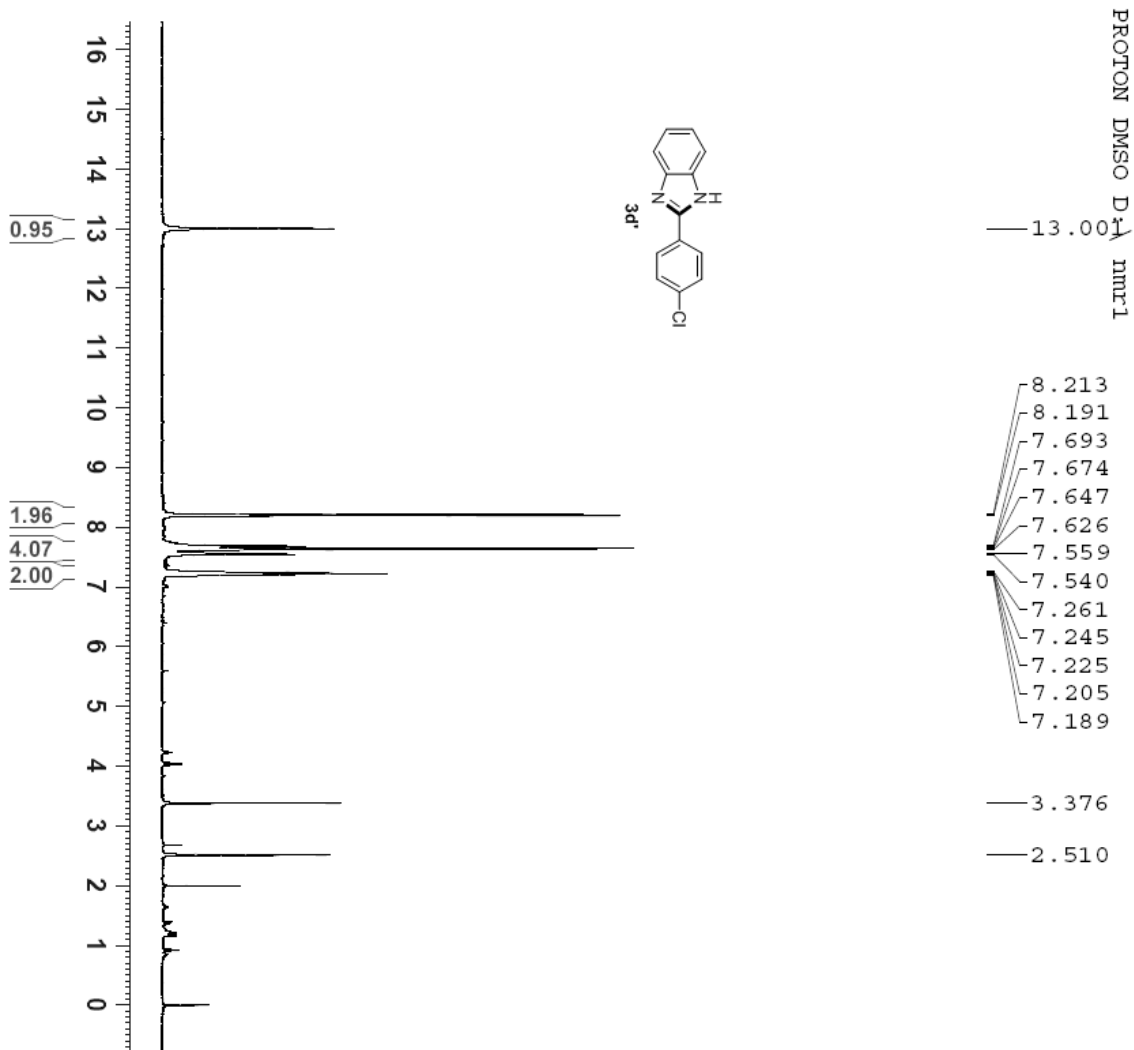

C13CPD DMSO D: \ nmr1

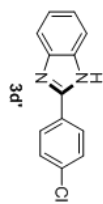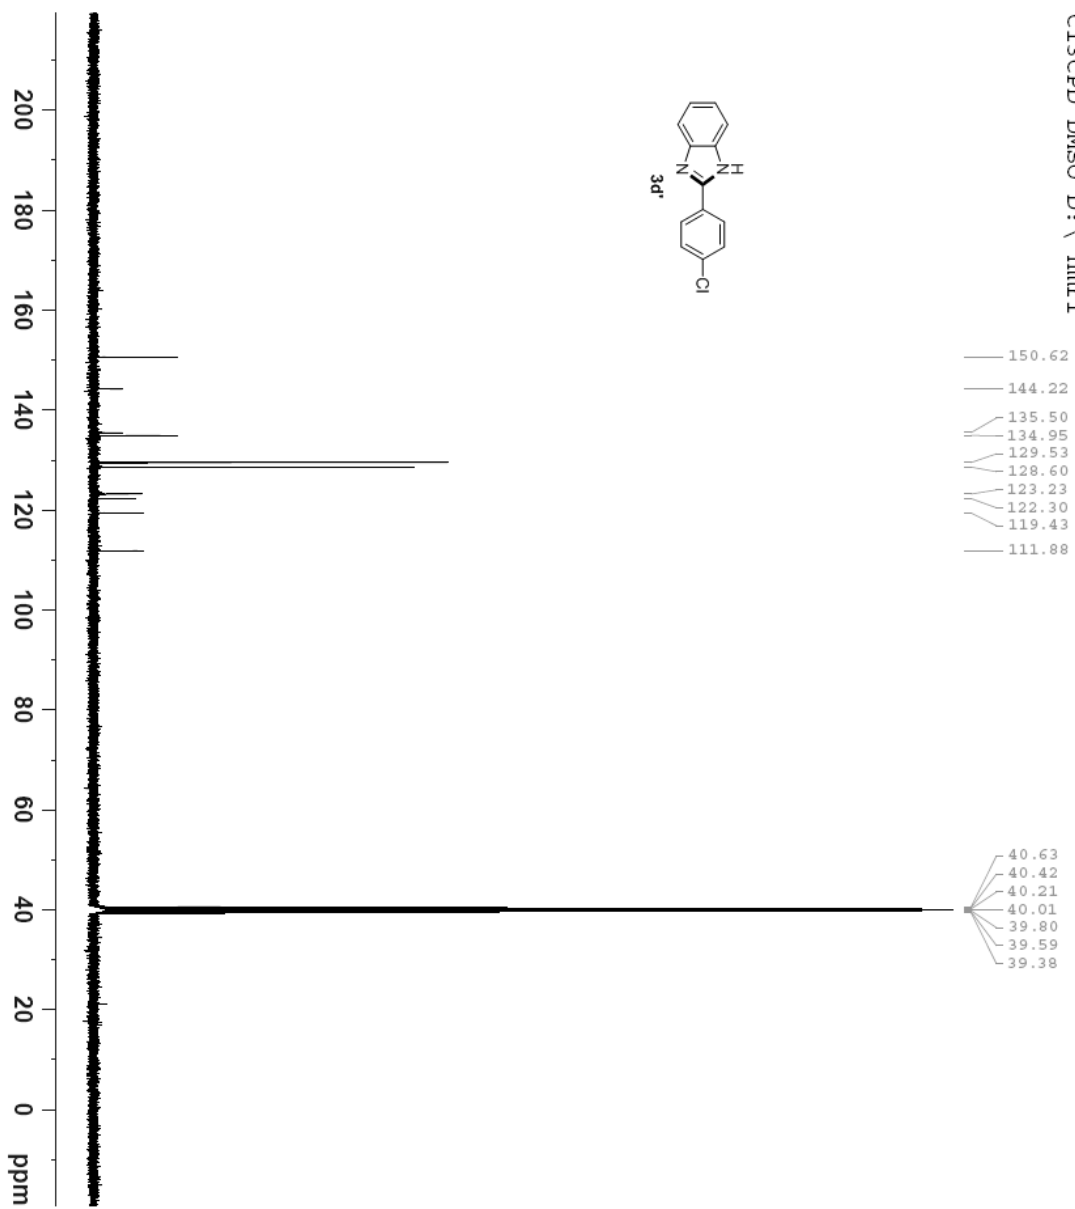

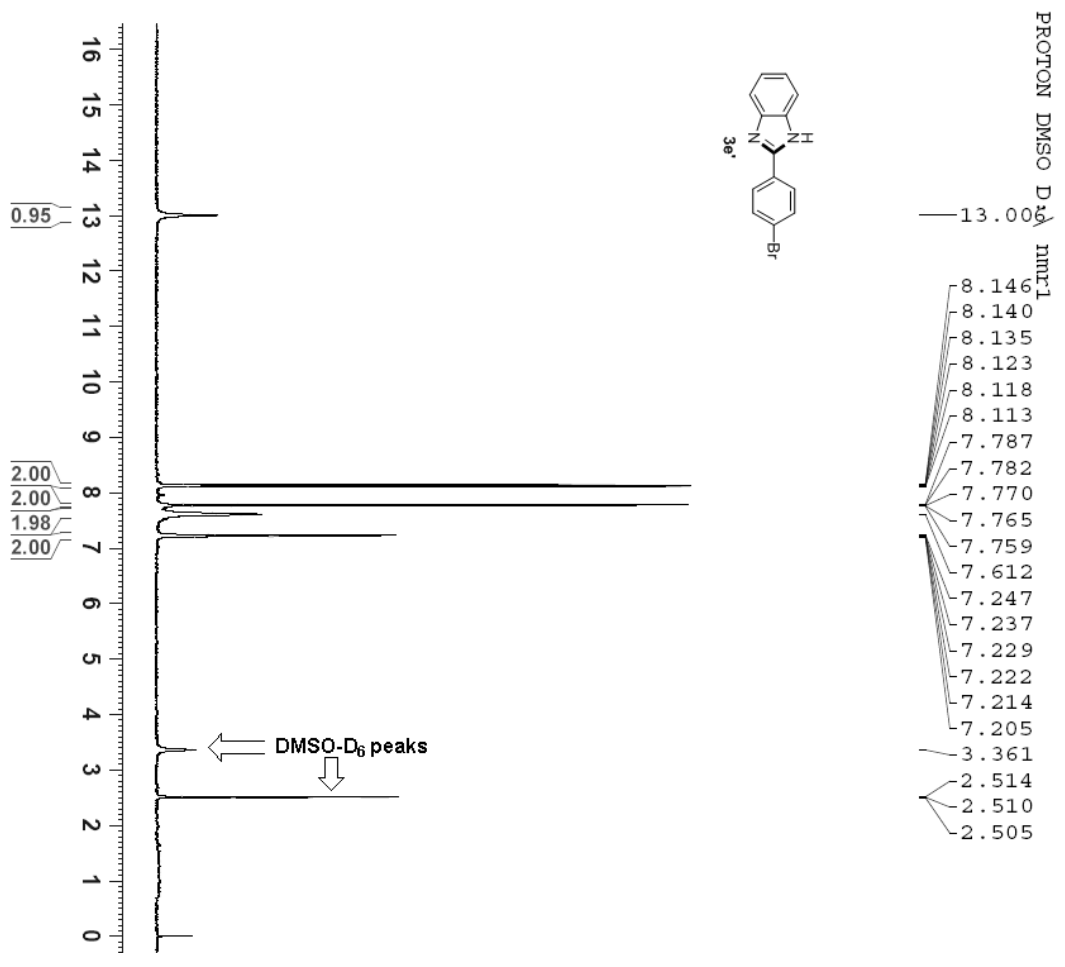

C13CPD DMSO D: \ nmr1

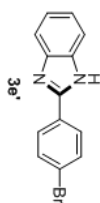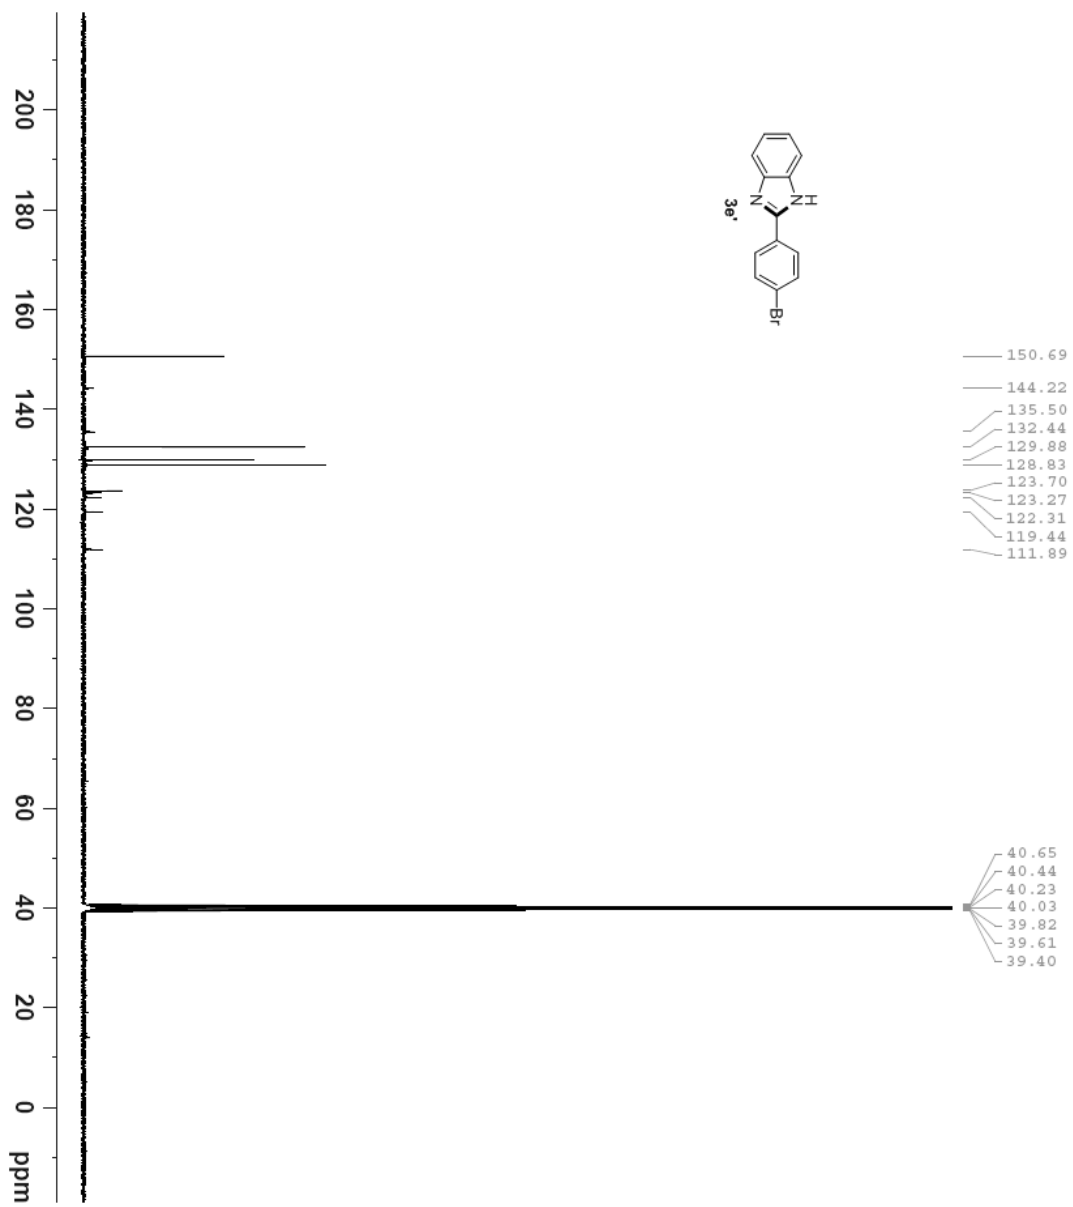



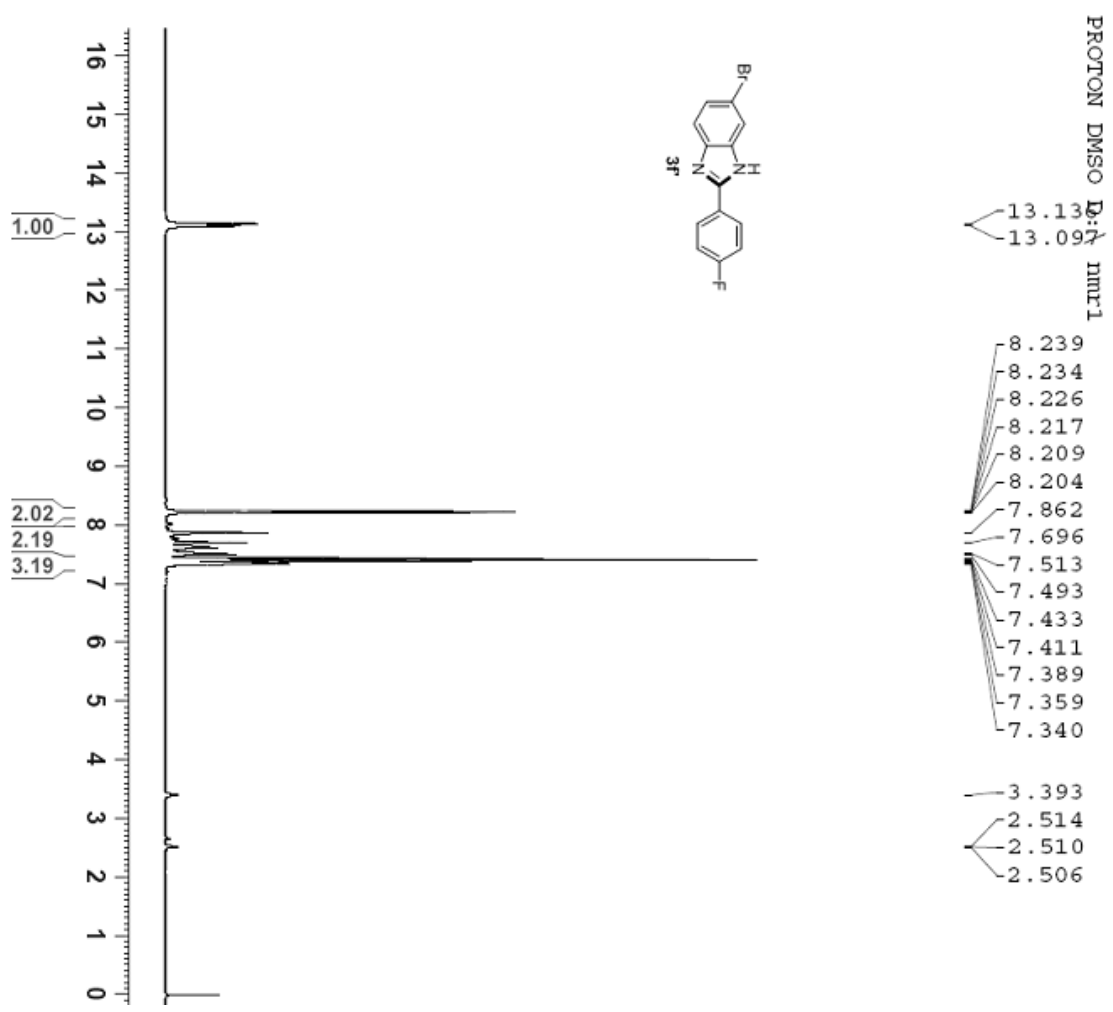

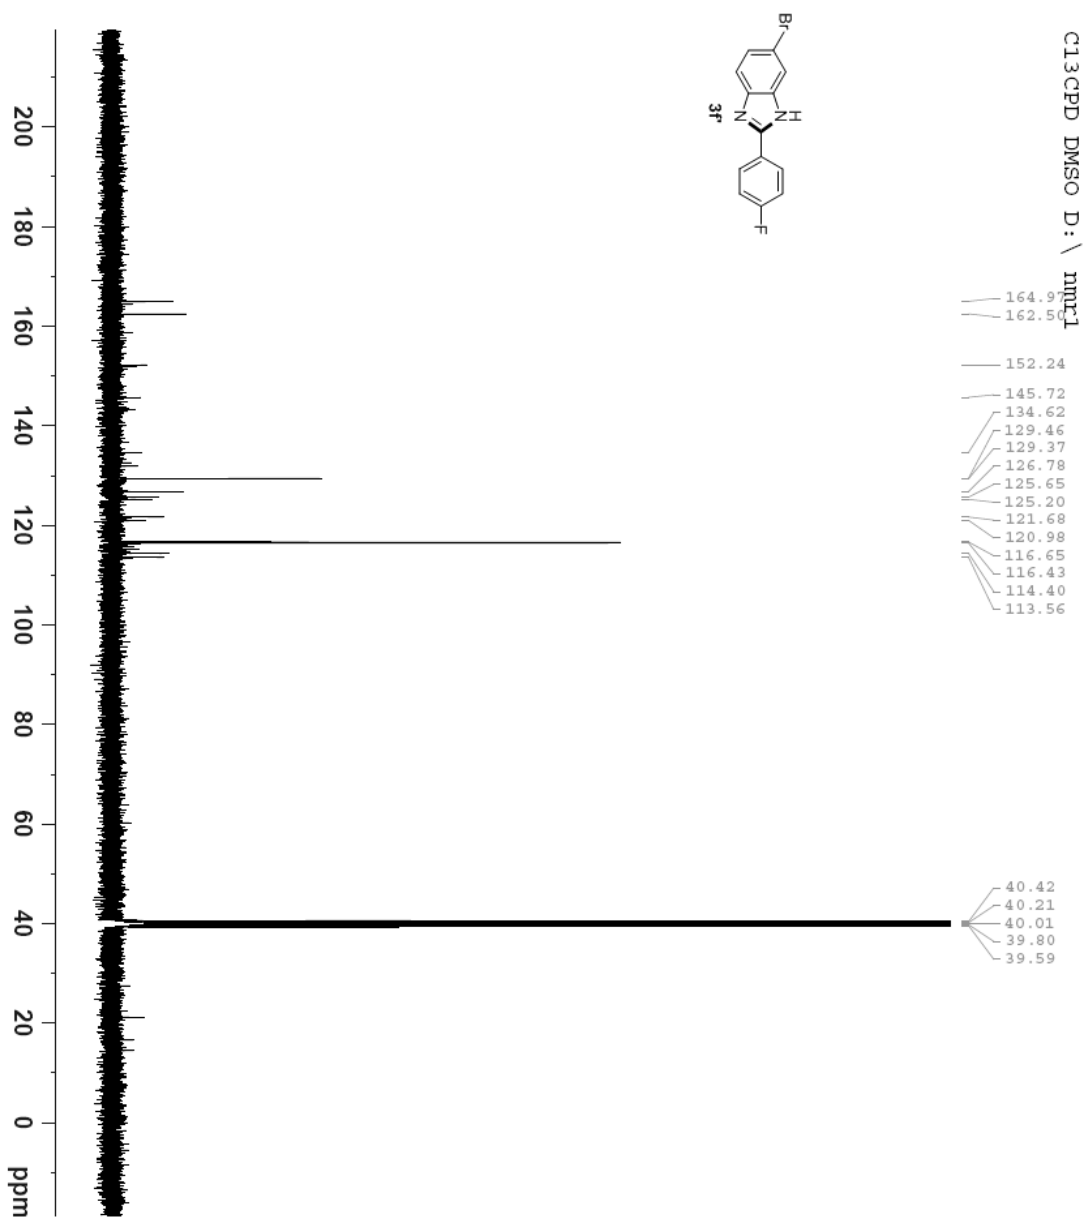

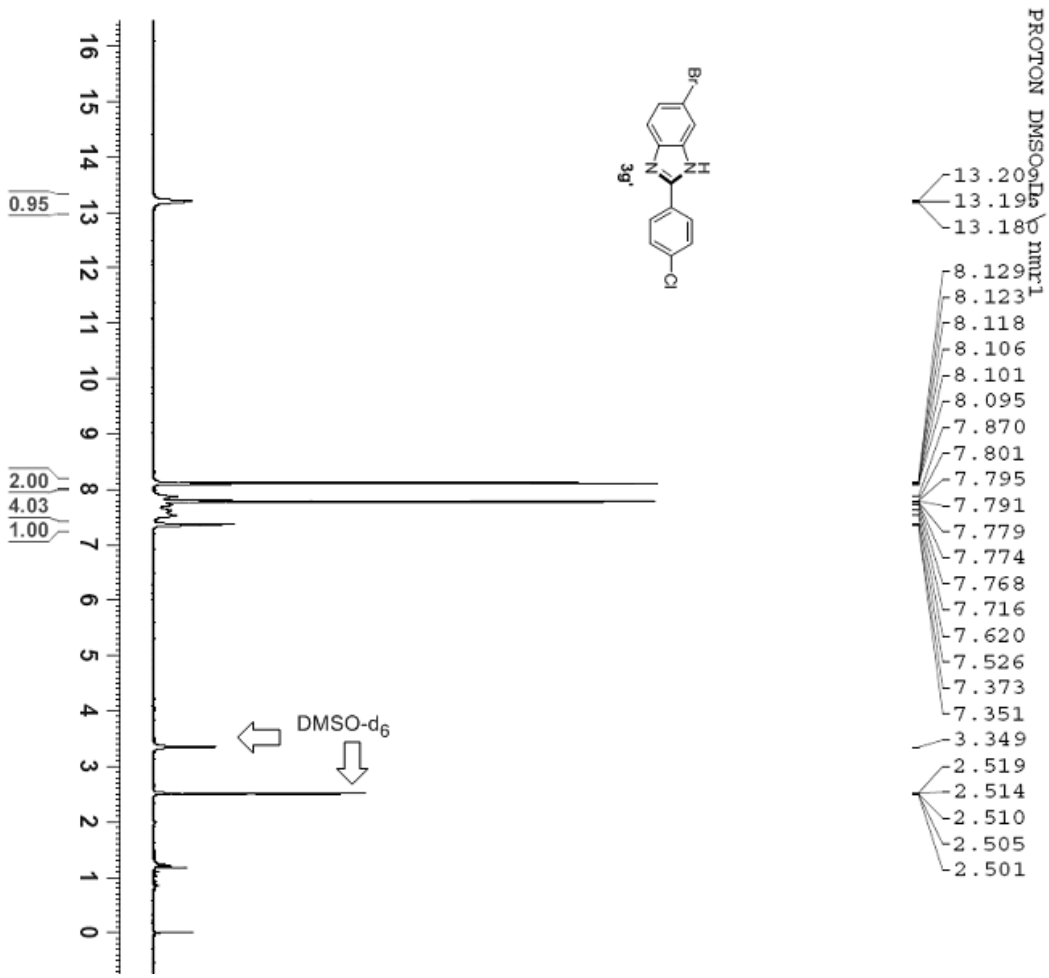

C13CPD DMSO D: \ nmr1

152.09  
132.46  
129.38  
128.97  
125.84  
125.34  
124.15  
121.82  
121.10  
114.53  
113.64

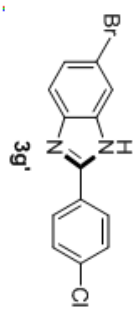

40.68  
40.47  
40.26  
40.05  
39.84  
39.64  
39.43

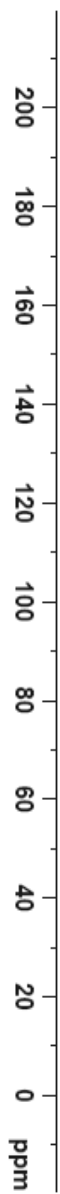

Supplement: c4ra00559g1.pdf [file c4ra00559g1.pdf]
